# Supplementary material for: Theoretical investigation of the effect of radical substituents on the open-shell character of polycyclic aromatic hydrocarbons
Source: Royal Society of Chemistry journal article supplement (doi:10.1039/d4nj00555d), 2024-01-01
Supplement: d4nj00555d1.pdf [file d4nj00555d1.pdf]

## Theoretical investigation on the effect of radical substituents on the open-shell character of polycyclic aromatic hydrocarbon

Tomohito Shinozuka,<sup>a</sup> Daiki Shimizu<sup>\*a</sup> and Kenji Matsuda<sup>\*a,b</sup>

a. Department of Synthetic Chemistry and Biological Chemistry, Graduate School of Engineering, Kyoto University, Katsura, Nishikyo-ku, Kyoto 615-8510, Japan.

b. Fukui Institute for Fundamental Chemistry (FIFC), Kyoto University, Sakyo-ku, Kyoto 606-8103, Japan.

### Contents

|                                                                                                                        |              |
|------------------------------------------------------------------------------------------------------------------------|--------------|
| <b>1. The effect of Mt/Allyl type radicals on PAH's orbital energies</b>                                               | <b>p. 2</b>  |
| <b>2. Plots of <math>y_0</math> vs. UDFT HOMO–LUMO gap</b>                                                             | <b>p. 4</b>  |
| <b>3. Calculated values shown in Fig. 5,7,8 (plots of <math>y_0</math> vs. R(O)DFT HOMO–LUMO gap) in the main text</b> | <b>p. 6</b>  |
| <b>4. Calculated values shown in Fig. S2 (plots of <math>y_0</math> vs. UDFT HOMO–LUMO gap)</b>                        | <b>p. 16</b> |
| <b>5. All optimized structures of PAHs with various substituents dealt with in this work</b>                           | <b>p. 26</b> |

# 1. The effect of Mt/Allyl type radicals on PAH's orbital energies

**Table S1** The effect of Mt and Allyl radical substituents on orbital energies of five PAHs subjected in this work. These orbital energies were obtained by simple Hückel molecular orbital theory.

| PAH | PAH with Mt<br>HOMO/LUMO                                                     |  | With no Radical<br>HOMO/LUMO                                                 |  | PAH with Allyl<br>HOMO/LUMO                                                  |
|-----|------------------------------------------------------------------------------|--|------------------------------------------------------------------------------|--|------------------------------------------------------------------------------|
| An  | $\varepsilon_L = \alpha - 0.68\beta$<br>$\varepsilon_H = \alpha + 0.68\beta$ |  | $\varepsilon_L = \alpha - 0.41\beta$<br>$\varepsilon_H = \alpha + 0.41\beta$ |  | $\varepsilon_L = \alpha - 0.38\beta$<br>$\varepsilon_H = \alpha + 0.38\beta$ |
| Pn  | $\varepsilon_L = \alpha - 0.49\beta$<br>$\varepsilon_H = \alpha + 0.49\beta$ |  | $\varepsilon_L = \alpha - 0.22\beta$<br>$\varepsilon_H = \alpha + 0.22\beta$ |  | $\varepsilon_L = \alpha - 0.21\beta$<br>$\varepsilon_H = \alpha + 0.21\beta$ |
| Hp  | $\varepsilon_L = \alpha - 0.38\beta$<br>$\varepsilon_H = \alpha + 0.38\beta$ |  | $\varepsilon_L = \alpha - 0.13\beta$<br>$\varepsilon_H = \alpha + 0.13\beta$ |  | $\varepsilon_L = \alpha - 0.13\beta$<br>$\varepsilon_H = \alpha + 0.13\beta$ |
| Nn  | $\varepsilon_L = \alpha - 0.31\beta$<br>$\varepsilon_H = \alpha + 0.31\beta$ |  | $\varepsilon_L = \alpha - 0.09\beta$<br>$\varepsilon_H = \alpha + 0.09\beta$ |  | $\varepsilon_L = \alpha - 0.09\beta$<br>$\varepsilon_H = \alpha + 0.09\beta$ |
| Tri | $\varepsilon_L = \alpha - 0.39\beta$<br>$\varepsilon_H = \alpha + 0.39\beta$ |  | $\varepsilon_L = \alpha - 0.00\beta$<br>$\varepsilon_H = \alpha + 0.00\beta$ |  | $\varepsilon_L = \alpha - 0.00\beta$<br>$\varepsilon_H = \alpha + 0.00\beta$ |

**Table S2** The effect of Mt and Allyl radical substituents on orbital energies of five PAHs subjected in this work. These orbital energies were obtained by LC-R(O)BLYP( $\mu=0.33$ )/6-311G(d,p) level.

| PAH | R = Mt<br>HOMO/LUMO<br>(eV)                          |  | R = H<br>HOMO/LUMO<br>(eV)                           |  | R = Allyl<br>HOMO/LUMO<br>(eV)                       |
|-----|------------------------------------------------------|--|------------------------------------------------------|--|------------------------------------------------------|
| An  | $\varepsilon_L = -0.210$<br>$\varepsilon_H = -7.932$ |  | $\varepsilon_L = -0.409$<br>$\varepsilon_H = -7.561$ |  | $\varepsilon_L = -0.452$<br>$\varepsilon_H = -7.433$ |
| Pn  | $\varepsilon_L = -0.719$<br>$\varepsilon_H = -7.563$ |  | $\varepsilon_L = -1.213$<br>$\varepsilon_H = -6.779$ |  | $\varepsilon_L = -1.238$<br>$\varepsilon_H = -6.700$ |
| Hp  | $\varepsilon_L = -0.938$<br>$\varepsilon_H = -7.314$ |  | $\varepsilon_L = -1.769$<br>$\varepsilon_H = -6.253$ |  | $\varepsilon_L = -1.796$<br>$\varepsilon_H = -6.190$ |
| Nn  | $\varepsilon_L = -1.104$<br>$\varepsilon_H = -7.054$ |  | $\varepsilon_L = -2.084$<br>$\varepsilon_H = -5.955$ |  | $\varepsilon_L = -2.099$<br>$\varepsilon_H = -5.911$ |
| Tri | $\varepsilon_L = -0.964$<br>$\varepsilon_H = -7.208$ |  | $\varepsilon_L = -2.609$<br>$\varepsilon_H = -5.446$ |  | $\varepsilon_L = -2.586$<br>$\varepsilon_H = -5.208$ |

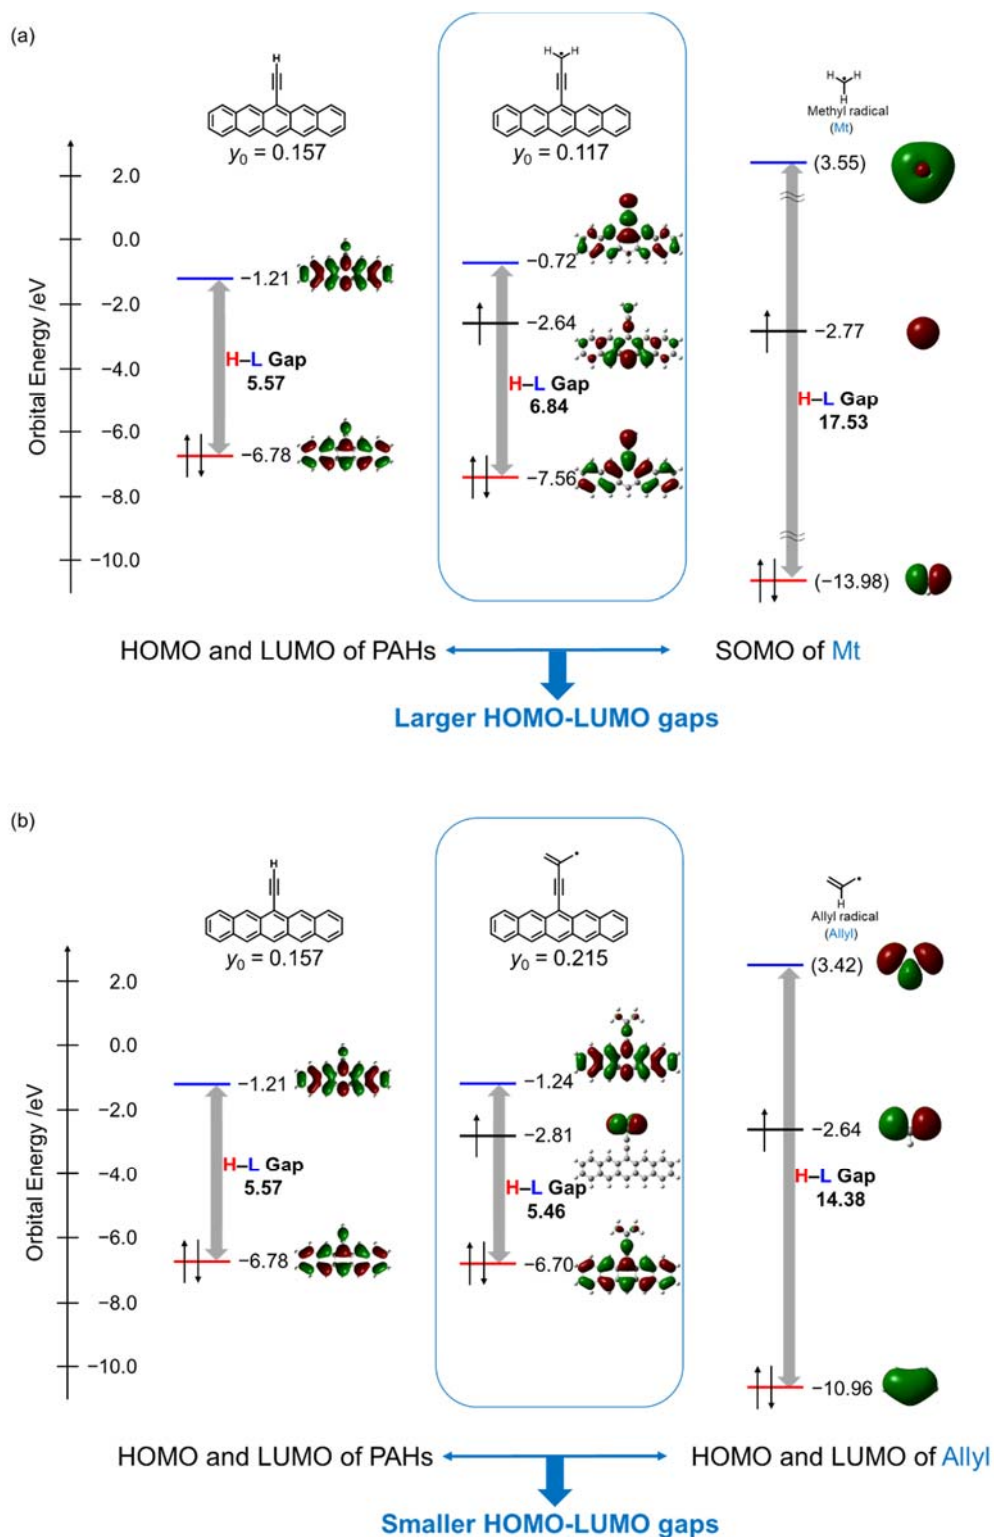

**Fig S1.** The effect of (a)Mt and (b)Allyl radical substituents on orbital energies of PAHs from the viewpoints of Kohn-Sham energies. The results of pentacenes are displayed as a representative of five PAHs. These orbital energies were obtained by LC-R(O)BLYP( $\mu=0.33$ )/6-311G(d,p) level of theory.

## 2. Plots of $y_0$ vs. UDFT HOMO–LUMO gap

Fig. S2 shows a scatter plot of  $y_0$  and HOMO–LUMO gaps calculated by unrestricted DFT. Unlike the correlation between  $y_0$  and the HOMO–LUMO gap calculated by restricted/restricted-open DFT shown in Fig. 7 in the main text, no clear correlation between the two values were observed.

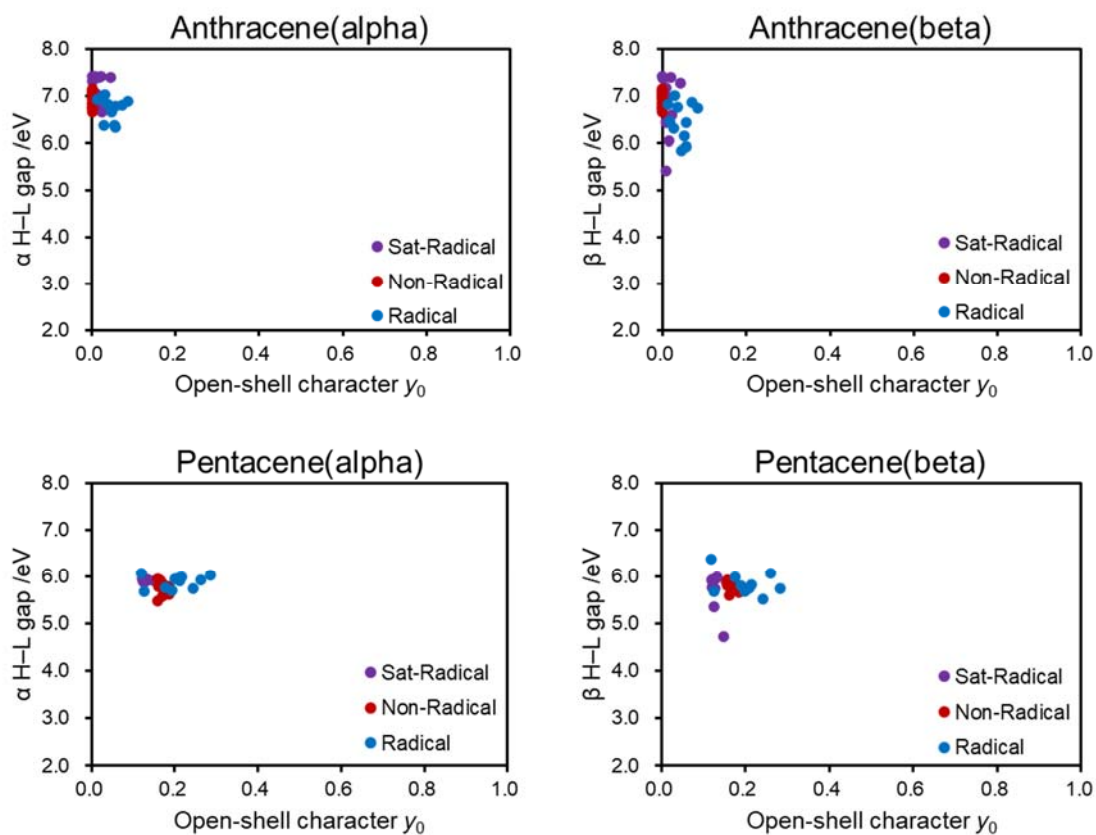

**Fig S2-1.** The scatter plot of  $y_0$  and HOMO–LUMO gaps in **An** and **Pn** systems, which were obtained by LC-UBLYP( $\mu=0.33$ )/6-311G(d,p) level of theory.

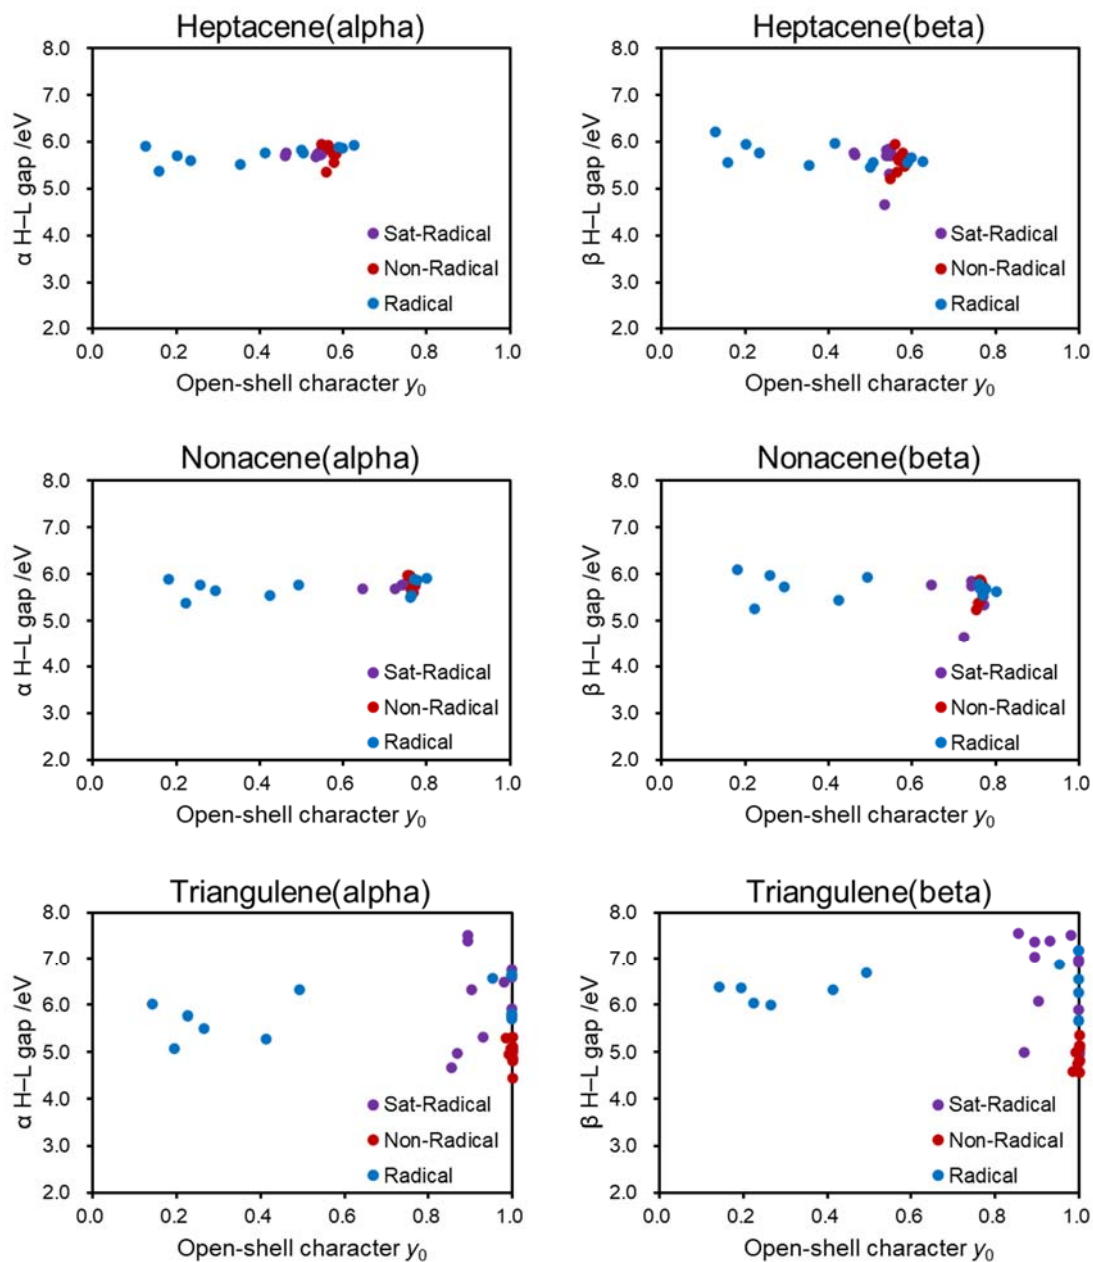

**Fig S2-2.** The scatter plot of  $y_0$  and HOMO–LUMO gaps in **Hp**, **Nn** and **Tri** systems, which were obtained by LC-UBLYP( $\mu=0.33$ )/6-311G(d,p) level of theory.

### 3. Calculated values shown in Fig. 5,7,8 (plots of $y_0$ vs. R(O)DFT HOMO–LUMO gap) in the main text

**Table S3** Calculated open-shell character  $y_0$ , orbital energies, H–L gaps, and S–T gaps of **Non-Radical** substituted anthracenes (**An**). Open-shell character  $y_0$ , orbital energies and S–T gaps were obtained by LC-UBLYP( $\mu=0.33$ )/6-311G(d,p), LC-RBLYP( $\mu=0.33$ )/6-311G(d,p) and RAS(4,4)-SF/cc-PVTZ, respectively.

| <b>An</b>         | $y_0$ | HOMO<br>/eV | SOMO<br>/eV | LUMO<br>/eV | H–L gap<br>/eV | S–T gap<br>/eV |
|-------------------|-------|-------------|-------------|-------------|----------------|----------------|
| NO <sub>2</sub>   | 0.000 | -8.068      | -           | -1.333      | 6.735          | 2.272          |
| CN                | 0.000 | -7.976      | -           | -1.047      | 6.929          | 2.323          |
| Cl                | 0.000 | -7.580      | -           | -0.478      | 7.102          | 2.361          |
| H                 | 0.000 | -7.561      | -           | -0.409      | 7.152          | 2.364          |
| CHO               | 0.000 | -7.835      | -           | -0.985      | 6.850          | 2.302          |
| SiMe <sub>3</sub> | 0.000 | -7.489      | -           | -0.423      | 7.067          | 2.338          |
| OMe               | 0.000 | -7.199      | -           | -0.149      | 7.050          | 2.349          |
| NH <sub>2</sub>   | 0.000 | -7.031      | -           | -0.071      | 6.960          | 2.340          |
| Ph                | 0.000 | -7.341      | -           | -0.506      | 6.834          | 2.123          |
| BzTh              | 0.000 | -7.340      | -           | -0.672      | 6.668          | 2.081          |
| Th                | 0.000 | -7.304      | -           | -0.559      | 6.745          | 2.089          |

**Table S4** Calculated open-shell character  $y_0$ , orbital energies, H–L gaps, and D–Q gaps of **Radical** substituted anthracenes (**An**). Open-shell character  $y_0$ , orbital energies and D–Q gaps were obtained by LC-UBLYP( $\mu=0.33$ )/6-311G(d,p), LC-ROBLYP( $\mu=0.33$ )/6-311G(d,p) and RAS(5,5)-SF/cc-PVTZ, respectively.

| <b>An</b> | $y_0$ | HOMO<br>/eV | SOMO<br>/eV | LUMO<br>/eV | H–L gap<br>/eV | D–Q<br>gap/eV |
|-----------|-------|-------------|-------------|-------------|----------------|---------------|
| Mt        | 0.070 | -7.932      | -2.714      | -0.210      | 7.722          | 2.718         |
| DCM       | 0.055 | -8.599      | -3.623      | -1.124      | 7.475          | 2.918         |
| DPM       | 0.056 | -7.633      | -2.644      | -0.342      | 7.290          | 2.627         |
| Flu       | 0.052 | -7.754      | -2.866      | -0.519      | 7.235          | 2.496         |
| PhO       | 0.045 | -7.940      | -3.328      | -0.807      | 7.133          | 2.584         |
| NO        | 0.035 | -7.647      | -2.826      | -0.345      | 7.302          | 2.396         |
| Allyl     | 0.028 | -7.433      | -2.807      | -0.452      | 6.981          | 2.285         |
| IN        | 0.012 | -7.544      | -2.770      | -0.630      | 6.914          | 2.317         |
| Phen      | 0.026 | -7.352      | -2.637      | -0.523      | 6.829          | 2.091         |
| Ver       | 0.018 | -7.519      | -3.025      | -0.633      | 6.886          | 2.083         |
| NN        | 0.083 | -7.361      | -2.540      | -0.682      | 6.680          | 1.939         |

**Table S5** Calculated open-shell character  $y_0$ , orbital energies, and H–L gaps of **Sat-Radical** substituted anthracenes (**An**). Open-shell character  $y_0$  and orbital energies were obtained by LC-UBLYP( $\mu=0.33$ )/6-311G(d,p) and LC-ROBLYP( $\mu=0.33$ )/6-311G(d,p), respectively.

| <b>An</b> | $y_0$ | HOMO<br>/eV | SOMO<br>/eV | LUMO<br>/eV | H–L gap<br>/eV |
|-----------|-------|-------------|-------------|-------------|----------------|
| Sat-H     | 0.000 | -7.462      | -           | -0.044      | 7.417          |
| Sat-Mt    | 0.001 | -7.502      | -2.512      | -0.071      | 7.431          |
| Sat-DCM   | 0.007 | -7.869      | -4.083      | -0.448      | 7.420          |
| Sat-DPM   | 0.011 | -7.503      | -2.449      | -0.088      | 7.415          |
| Sat-Flu   | 0.008 | -7.575      | -2.794      | -0.156      | 7.419          |
| Sat-PhO   | 0.015 | -7.730      | -3.394      | -0.316      | 7.413          |
| Sat-NO    | 0.001 | -7.583      | -2.351      | -0.149      | 7.434          |
| Sat-Allyl | 0.020 | -7.497      | -2.664      | -0.091      | 7.405          |
| Sat-IN    | 0.007 | -7.426      | -2.828      | -0.018      | 7.408          |
| Sat-Phen  | 0.022 | -7.517      | -2.559      | -0.118      | 7.399          |
| Sat-Ver   | 0.012 | -7.517      | -3.012      | -0.113      | 7.404          |
| Sat-NN    | 0.043 | -7.401      | -2.597      | -0.005      | 7.396          |

**Table S6** Calculated open-shell character  $y_0$ , orbital energies, H–L gaps, and S–T gaps of **Non-Radical** substituted pentacenes (**Pn**). Open-shell character  $y_0$ , orbital energies and S–T gaps were obtained by LC-UBLYP( $\mu=0.33$ )/6-311G(d,p), LC-RBLYP( $\mu=0.33$ )/6-311G(d,p) and RAS(4,4)-SF/cc-PVTZ, respectively.

| <b>Pn</b>         | $y_0$ | HOMO<br>/eV | SOMO<br>/eV | LUMO<br>/eV | H–L gap<br>/eV | S–T gap<br>/eV |
|-------------------|-------|-------------|-------------|-------------|----------------|----------------|
| NO <sub>2</sub>   | 0.156 | -7.188      | -           | -1.814      | 5.374          | 1.487          |
| CN                | 0.161 | -7.127      | -           | -1.678      | 5.449          | 1.136          |
| Cl                | 0.158 | -6.808      | -           | -1.266      | 5.541          | 1.165          |
| H                 | 0.157 | -6.779      | -           | -1.213      | 5.567          | 1.169          |
| CHO               | 0.169 | -7.008      | -           | -1.591      | 5.417          | 1.109          |
| SiMe <sub>3</sub> | 0.164 | -6.736      | -           | -1.214      | 5.523          | 1.154          |
| OMe               | 0.167 | -6.530      | -           | -1.016      | 5.514          | 1.153          |
| NH <sub>2</sub>   | 0.176 | -6.420      | -           | -0.954      | 5.466          | 1.134          |
| Ph                | 0.176 | -6.663      | -           | -1.245      | 5.417          | 1.133          |
| BzTh              | 0.183 | -6.692      | -           | -1.342      | 5.350          | 1.123          |
| Th                | 0.184 | -6.651      | -           | -1.275      | 5.376          | 1.124          |

**Table S7** Calculated open-shell character  $y_0$ , orbital energies, H–L gaps, and D–Q gaps of **Radical** substituted pentacenes (**Pn**). Open-shell character  $y_0$ , orbital energies and D–Q gaps were obtained by LC-UBLYP( $\mu=0.33$ )/6-311G(d,p), LC-ROBLYP( $\mu=0.33$ )/6-311G(d,p) and RAS(5,5)-SF/cc-PVTZ, respectively.

| <b>Pn</b> | $y_0$ | HOMO<br>/eV | SOMO<br>/eV | LUMO<br>/eV | H–L gap<br>/eV | D–Q gap<br>/eV |
|-----------|-------|-------------|-------------|-------------|----------------|----------------|
| Mt        | 0.117 | -7.563      | -2.638      | -0.719      | 6.844          | 1.880          |
| DCM       | 0.124 | -8.122      | -3.223      | -1.893      | 6.230          | 2.058          |
| DPM       | 0.175 | -7.065      | -2.604      | -1.046      | 6.019          | 1.595          |
| Flu       | 0.190 | -7.159      | -2.740      | -1.360      | 5.798          | 1.681          |
| PhO       | 0.241 | -7.180      | -3.169      | -1.634      | 5.546          | 1.383          |
| NO        | 0.259 | -6.828      | -2.811      | -1.219      | 5.609          | 1.284          |
| Allyl     | 0.215 | -6.700      | -2.810      | -1.238      | 5.462          | 1.117          |
| IN        | 0.197 | -6.764      | -2.773      | -1.324      | 5.440          | 1.124          |
| Phen      | 0.210 | -6.669      | -2.641      | -1.261      | 5.408          | 1.109          |
| Ver       | 0.207 | -6.774      | -3.020      | -1.343      | 5.431          | 1.111          |
| NN        | 0.284 | -6.647      | -2.537      | -1.348      | 5.298          | 0.940          |



**Table S8** Calculated open-shell character  $y_0$ , orbital energies, and H–L gaps of **Sat-Radical** substituted pentacenes (**Pn**). Open-shell character  $y_0$  and orbital energies were obtained by LC-UBLYP( $\mu=0.33$ )/6-311G(d,p) and LC-ROBLYP( $\mu=0.33$ )/6-311G(d,p), respectively.

| <b>Pn</b> | $y_0$ | HOMO<br>/eV | SOMO<br>/eV | LUMO<br>/eV | H–L gap<br>/eV |
|-----------|-------|-------------|-------------|-------------|----------------|
| Sat-H     | 0.120 | -6.680      | -           | -0.975      | 5.706          |
| Sat-Mt    | 0.131 | -6.713      | -2.523      | -0.996      | 5.717          |
| Sat-DCM   | 0.147 | -6.995      | -4.063      | -1.308      | 5.687          |
| Sat-DPM   | 0.128 | -6.709      | -2.462      | -1.002      | 5.707          |
| Sat-Flu   | 0.128 | -6.772      | -2.803      | -1.063      | 5.709          |
| Sat-PhO   | 0.125 | -6.907      | -3.394      | -1.203      | 5.704          |
| Sat-NO    | 0.133 | -6.763      | -2.370      | -1.047      | 5.717          |
| Sat-Allyl | 0.122 | -6.711      | -2.676      | -1.011      | 5.700          |
| Sat-IN    | 0.121 | -6.628      | -2.856      | -0.928      | 5.700          |
| Sat-Phen  | 0.121 | -6.730      | -2.566      | -1.032      | 5.698          |
| Sat-Ver   | 0.121 | -6.718      | -3.022      | -1.018      | 5.700          |
| Sat-NN    | 0.125 | -6.603      | -2.620      | -0.908      | 5.695          |

**Table S9** Calculated open-shell character  $y_0$ , orbital energies, H–L gaps, and S–T gaps of **Non-Radical** substituted heptacenes (**Hp**). Open-shell character  $y_0$ , orbital energies and S–T gaps were obtained by LC-UBLYP( $\mu=0.33$ )/6-311G(d,p), LC-RBLYP( $\mu=0.33$ )/6-311G(d,p) and RAS(4,4)-SF/cc-PVTZ, respectively.

| <b>Hp</b>         | $y_0$ | HOMO<br>/eV | SOMO<br>/eV | LUMO<br>/eV | H–L gap<br>/eV | S–T gap<br>/eV |
|-------------------|-------|-------------|-------------|-------------|----------------|----------------|
| NO <sub>2</sub>   | 0.548 | -6.633      | -           | -2.222      | 4.412          | 0.619          |
| CN                | 0.559 | -6.572      | -           | -2.143      | 4.429          | 0.602          |
| Cl                | 0.567 | -6.281      | -           | -1.813      | 4.468          | 0.462          |
| H                 | 0.567 | -6.253      | -           | -1.769      | 4.484          | 0.463          |
| CHO               | 0.563 | -6.470      | -           | -2.057      | 4.412          | 0.459          |
| SiMe <sub>3</sub> | 0.571 | -6.221      | -           | -1.766      | 4.455          | 0.456          |
| OMe               | 0.576 | -6.045      | -           | -1.603      | 4.443          | 0.449          |
| NH <sub>2</sub>   | 0.582 | -5.956      | -           | -1.547      | 4.409          | 0.436          |
| Ph                | 0.578 | -6.170      | -           | -1.786      | 4.385          | 0.443          |
| BzTh              | 0.582 | -6.204      | -           | -1.861      | 4.343          | 0.438          |
| Th                | 0.583 | -6.163      | -           | -1.808      | 4.355          | 0.436          |

**Table S10** Calculated open-shell character  $y_0$ , orbital energies, H–L gaps, and D–Q gaps of **Radical** substituted heptacenes (**Hp**). Open-shell character  $y_0$ , orbital energies and D–Q gaps were obtained by LC-UBLYP( $\mu=0.33$ )/6-311G(d,p), LC-ROBLYP( $\mu=0.33$ )/6-311G(d,p) and RAS(5,5)-SF/cc-PVTZ, respectively.

| <b>Hp</b> | $y_0$ | HOMO<br>/eV | SOMO<br>/eV | LUMO<br>/eV | H–L gap<br>/eV | D–Q gap<br>/eV |
|-----------|-------|-------------|-------------|-------------|----------------|----------------|
| Mt        | 0.127 | -7.314      | -2.631      | -0.938      | 6.377          | 1.801          |
| DCM       | 0.159 | -7.862      | -3.037      | -2.116      | 5.746          | 1.733          |
| DPM       | 0.202 | -6.918      | -2.603      | -1.210      | 5.708          | 1.410          |
| Flu       | 0.234 | -7.015      | -2.694      | -1.535      | 5.480          | 1.320          |
| PhO       | 0.354 | -7.194      | -2.893      | -2.044      | 5.150          | 1.106          |
| NO        | 0.414 | -6.878      | -2.666      | -1.392      | 5.486          | 0.668          |
| Allyl     | 0.598 | -6.190      | -2.800      | -1.796      | 4.394          | 0.419          |
| IN        | 0.500 | -6.326      | -2.763      | -1.747      | 4.579          | 0.605          |
| Phen      | 0.505 | -6.262      | -2.641      | -1.700      | 4.562          | 0.600          |
| Ver       | 0.589 | -6.261      | -3.003      | -1.873      | 4.388          | 0.425          |
| NN        | 0.625 | -6.155      | -2.512      | -1.860      | 4.295          | 0.404          |

**Table S11** Calculated open-shell character  $y_0$ , orbital energies, and H–L gaps of **Sat-Radical** substituted heptacenes (**Hp**). Open-shell character  $y_0$  and orbital energies were obtained by LC-UBLYP( $\mu=0.33$ )/6-311G(d,p) and LC-ROBLYP( $\mu=0.33$ )/6-311G(d,p), respectively.

| <b>Hp</b> | $y_0$ | HOMO<br>/eV | SOMO<br>/eV | LUMO<br>/eV | H–L gap<br>/eV |
|-----------|-------|-------------|-------------|-------------|----------------|
| Sat-H     | 0.549 | -6.159      | -           | -1.585      | 4.574          |
| Sat-Mt    | 0.545 | -6.186      | -2.525      | -1.605      | 4.581          |
| Sat-DCM   | 0.534 | -6.451      | -4.028      | -1.859      | 4.592          |
| Sat-DPM   | 0.539 | -6.189      | -2.468      | -1.602      | 4.587          |
| Sat-Flu   | 0.539 | -6.244      | -2.804      | -1.655      | 4.589          |
| Sat-PhO   | 0.546 | -6.361      | -3.385      | -1.785      | 4.576          |
| Sat-NO    | 0.545 | -6.224      | -2.380      | -1.643      | 4.581          |
| Sat-Allyl | 0.548 | -6.186      | -2.679      | -1.614      | 4.572          |
| Sat-IN    | 0.460 | -6.194      | -2.867      | -1.444      | 4.750          |
| Sat-Phen  | 0.548 | -6.203      | -2.569      | -1.634      | 4.569          |
| Sat-Ver   | 0.548 | -6.191      | -3.025      | -1.619      | 4.572          |
| Sat-NN    | 0.462 | -6.169      | -2.630      | -1.421      | 4.747          |

**Table S12** Calculated open-shell character  $y_0$ , orbital energies, H–L gaps, and S–T gaps of **Non-Radical** substituted nonacenes (**Nn**). Open-shell character  $y_0$ , orbital energies and S–T gaps were obtained by LC-UBLYP( $\mu=0.33$ )/6-311G(d,p), LC-RBLYP( $\mu=0.33$ )/6-311G(d,p) and RAS(4,4)-SF/cc-PVTZ, respectively.

| <b>Nn</b>         | $y_0$ | HOMO<br>/eV | SOMO<br>/eV | LUMO<br>/eV | H–L gap<br>/eV | S–T gap<br>/eV |
|-------------------|-------|-------------|-------------|-------------|----------------|----------------|
| NO <sub>2</sub>   | 0.753 | -6.294      | -           | -2.476      | 3.818          | 0.264          |
| CN                | 0.759 | -6.243      | -           | -2.414      | 3.830          | 0.188          |
| Cl                | 0.763 | -5.982      | -           | -2.123      | 3.859          | 0.190          |
| H                 | 0.763 | -5.955      | -           | -2.084      | 3.871          | 0.192          |
| CHO               | 0.760 | -6.151      | -           | -2.332      | 3.819          | 0.187          |
| SiMe <sub>3</sub> | 0.765 | -5.930      | -           | -2.079      | 3.850          | 0.187          |
| OMe               | 0.768 | -5.776      | -           | -1.936      | 3.840          | 0.184          |
| NH <sub>2</sub>   | 0.772 | -5.701      | -           | -1.884      | 3.817          | 0.176          |
| Ph                | 0.768 | -5.893      | -           | -2.092      | 3.800          | 0.179          |
| BzTh              | 0.770 | -5.927      | -           | -2.155      | 3.771          | 0.177          |
| Th                | 0.771 | -5.889      | -           | -2.109      | 3.780          | 0.177          |

**Table S13** Calculated open-shell character  $y_0$ , orbital energies, H–L gaps, and D–Q gaps of **Radical** substituted nonacenes (**Nn**). Open-shell character  $y_0$ , orbital energies and D–Q gaps were obtained by LC-UBLYP( $\mu=0.33$ )/6-311G(d,p), LC-ROBLYP( $\mu=0.33$ )/6-311G(d,p) and RAS(5,5)-SF/cc-PVTZ, respectively..

| <b>Nn</b> | $y_0$ | HOMO<br>/eV | SOMO<br>/eV | LUMO<br>/eV | H–L gap<br>/eV | D–Q gap<br>/eV |
|-----------|-------|-------------|-------------|-------------|----------------|----------------|
| Mt        | 0.182 | -7.054      | -2.639      | -1.104      | 5.951          | 2.000          |
| DCM       | 0.223 | -7.385      | -2.961      | -2.216      | 5.169          | 1.390          |
| DPM       | 0.258 | -6.775      | -2.615      | -1.330      | 5.445          | 1.284          |
| Flu       | 0.293 | -6.873      | -2.688      | -1.638      | 5.234          | 1.516          |
| PhO       | 0.424 | -7.052      | -2.850      | -2.139      | 4.913          | 1.013          |
| NO        | 0.493 | -6.738      | -2.669      | -1.518      | 5.219          | 1.267          |
| Allyl     | 0.776 | -5.911      | -2.796      | -2.099      | 3.812          | 0.170          |
| IN        | 0.769 | -5.957      | -2.746      | -2.143      | 3.814          | 0.177          |
| Phen      | 0.764 | -5.898      | -2.634      | -2.108      | 3.790          | 0.166          |
| Ver       | 0.761 | -5.974      | -2.994      | -2.167      | 3.807          | 0.169          |
| NN        | 0.801 | -5.865      | -2.522      | -2.147      | 3.718          | 0.141          |

**Table S14** Calculated open-shell character  $y_0$ , orbital energies, and H–L gaps of **Sat-Radical** substituted nonacenes (**Nn**). Open-shell character  $y_0$  and orbital energies were obtained by LC-UBLYP( $\mu=0.33$ )/6-311G(d,p) and LC-ROBLYP( $\mu=0.33$ )/6-311G(d,p), respectively.

| <b>Nn</b> | $y_0$ | HOMO<br>/eV | SOMO<br>/eV | LUMO<br>/eV | H–L gap<br>/eV |
|-----------|-------|-------------|-------------|-------------|----------------|
| Sat-H     | 0.757 | -5.863      | -           | -1.935      | 3.928          |
| Sat-Mt    | 0.646 | -6.005      | -2.530      | -1.823      | 4.182          |
| Sat-DCM   | 0.723 | -6.134      | -4.028      | -2.164      | 3.970          |
| Sat-DPM   | 0.742 | -5.889      | -2.470      | -1.952      | 3.936          |
| Sat-Flu   | 0.741 | -5.938      | -2.803      | -2.000      | 3.938          |
| Sat-PhO   | 0.772 | -6.018      | -3.376      | -2.148      | 3.870          |
| Sat-NO    | 0.761 | -5.769      | -2.575      | -2.149      | 3.620          |
| Sat-Allyl | 0.757 | -5.887      | -2.680      | -1.962      | 3.926          |
| Sat-IN    | 0.757 | -5.813      | -2.870      | -1.888      | 3.926          |
| Sat-Phen  | 0.756 | -5.904      | -2.569      | -1.979      | 3.925          |
| Sat-Ver   | 0.756 | -5.891      | -3.026      | -1.965      | 3.926          |
| Sat-NN    | 0.757 | -5.791      | -2.634      | -1.868      | 3.923          |

**Table S15** Calculated open-shell character  $y_0$ , orbital energies, H–L gaps, and S–T gaps of **Non-Radical** substituted triangulenes (**Tri**). Open-shell character  $y_0$ , orbital energies and S–T gaps were obtained by LC-UBLYP( $\mu=0.33$ )/6-311G(d,p), LC-RBLYP( $\mu=0.33$ )/6-311G(d,p) and RAS(4,4)-SF/cc-PVTZ, respectively.

| <b>Tri</b>        | $y_0$ | HOMO<br>/eV | SOMO<br>/eV | LUMO<br>/eV | H–L gap<br>/eV | S–T gap<br>/eV |
|-------------------|-------|-------------|-------------|-------------|----------------|----------------|
| NO <sub>2</sub>   | 1.000 | -6.081      | -           | -3.006      | 3.076          | 0.364          |
| CN                | 1.000 | -5.955      | -           | -2.957      | 2.998          | 0.340          |
| Cl                | 1.000 | -5.265      | -           | -2.719      | 2.546          | 0.336          |
| H                 | 1.000 | -5.446      | -           | -2.609      | 2.837          | 0.339          |
| CHO               | 0.986 | -5.839      | -           | -2.863      | 2.976          | 0.346          |
| SiMe <sub>3</sub> | 1.000 | -5.459      | -           | -2.634      | 2.825          | 0.335          |
| OMe               | 0.991 | -5.160      | -           | -2.365      | 2.795          | 0.335          |
| NH <sub>2</sub>   | 1.000 | -5.015      | -           | -2.266      | 2.749          | 0.328          |
| Ph                | 1.000 | -5.415      | -           | -2.669      | 2.746          | 0.331          |
| BzTh              | 0.997 | -5.502      | -           | -2.753      | 2.749          | 0.305          |
| Th                | 0.998 | -5.412      | -           | -2.689      | 2.724          | 0.313          |

**Table S16** Calculated open-shell character  $y_0$ , orbital energies, H–L gaps, and D–Q gaps of **Radical** substituted triangulenes (**Tri**). Open-shell character  $y_0$ , orbital energies and D–Q gaps were obtained by LC-UBLYP( $\mu=0.33$ )/6-311G(d,p), LC-ROBLYP( $\mu=0.33$ )/6-311G(d,p) and RAS(5,5)-SF/cc-PVTZ, respectively.

| <b>Tri</b> | $y_0$ | HOMO<br>/eV | SOMO<br>/eV | LUMO<br>/eV | H–L gap<br>/eV | D–Q gap<br>/eV |
|------------|-------|-------------|-------------|-------------|----------------|----------------|
| Mt         | 0.143 | -7.208      | -2.603      | -0.964      | 6.244          | 1.909          |
| DCM        | 0.194 | -7.917      | -2.985      | -2.320      | 5.597          | 1.214          |
| DPM        | 0.225 | -6.796      | -2.579      | -1.232      | 5.563          | 1.209          |
| Flu        | 0.265 | -6.911      | -2.663      | -1.584      | 5.327          | 1.298          |
| PhO        | 0.412 | -7.154      | -2.842      | -2.162      | 4.992          | 0.903          |
| NO         | 0.492 | -6.772      | -2.645      | -1.441      | 5.331          | 0.422          |
| Allyl      | 0.999 | -5.208      | -3.176      | -2.586      | 2.622          | 0.016          |
| IN         | 0.953 | -4.846      | -3.418      | -2.592      | 2.254          | 0.003          |
| Phen       | 0.999 | -4.769      | -3.139      | -2.687      | 2.082          | 0.025          |
| Ver        | 0.999 | -5.229      | -3.324      | -2.693      | 2.536          | 0.008          |
| NN         | 0.998 | -5.157      | -2.909      | -2.672      | 2.485          | 0.030          |

**Table S17** Calculated open-shell character  $y_0$ , orbital energies, and H–L gaps of **Sat-Radical** substituted triangulenes (**Tri**). Open-shell character  $y_0$  and orbital energies were obtained by LC-UBLYP( $\mu=0.33$ )/6-311G(d,p) and LC-ROBLYP( $\mu=0.33$ )/6-311G(d,p), respectively.

| <b>Tri</b> | $y_0$ | HOMO<br>/eV | SOMO<br>/eV | LUMO<br>/eV | H–L gap<br>/eV |
|------------|-------|-------------|-------------|-------------|----------------|
| Sat-H      | 1.000 | -5.190      | -           | -2.404      | 2.786          |
| Sat-Mt     | 0.894 | -5.629      | -2.570      | -2.076      | 3.553          |
| Sat-DCM    | 0.855 | -6.414      | -3.192      | -3.126      | 3.288          |
| Sat-DPM    | 0.904 | -5.210      | -2.666      | -2.384      | 2.826          |
| Sat-Flu    | 0.870 | -5.495      | -2.718      | -2.592      | 2.903          |
| Sat-PhO    | 0.930 | -5.720      | -2.971      | -3.132      | 2.588          |
| Sat-NO     | 0.894 | -5.574      | -2.551      | -2.150      | 3.424          |
| Sat-Allyl  | 0.998 | -5.222      | -2.934      | -2.420      | 2.802          |
| Sat-IN     | 0.980 | -5.255      | -2.699      | -2.627      | 2.628          |
| Sat-Phen   | 0.999 | -5.346      | -2.392      | -2.534      | 2.813          |
| Sat-Ver    | 0.998 | -5.195      | -3.226      | -2.430      | 2.764          |
| Sat-NN     | 0.998 | -5.211      | -2.504      | -2.394      | 2.817          |

#### 4. Calculated values shown in Fig. S2 (plots of $y_0$ vs. UDFT HOMO–LUMO gap)

**Table S18** Calculated open-shell character  $y_0$ , orbital energies, H–L gaps of **Non-Radical** substituted anthracenes (**An**). All values were obtained by LC-UBLYP( $\mu=0.33$ )/6-311G(d,p).

| <b>An</b>         | $y_0$ | $\alpha$ HOMO<br>/eV | $\alpha$ LUMO<br>/eV | $\alpha$ H–L gap<br>/eV | $\beta$ HOMO<br>/eV | $\beta$ LUMO<br>/eV | $\beta$ H–L gap<br>/eV |
|-------------------|-------|----------------------|----------------------|-------------------------|---------------------|---------------------|------------------------|
| NO <sub>2</sub>   | 0.000 | -8.068               | -1.333               | 6.735                   | -8.068              | -1.333              | 6.735                  |
| CN                | 0.000 | -7.976               | -1.047               | 6.929                   | -7.976              | -1.047              | 6.929                  |
| Cl                | 0.000 | -7.580               | -0.478               | 7.102                   | -7.580              | -0.478              | 7.102                  |
| H                 | 0.000 | -7.561               | -0.409               | 7.152                   | -7.561              | -0.409              | 7.152                  |
| CHO               | 0.000 | -7.835               | -0.985               | 6.850                   | -7.835              | -0.985              | 6.850                  |
| SiMe <sub>3</sub> | 0.000 | -7.489               | -0.423               | 7.067                   | -7.489              | -0.423              | 7.067                  |
| OMe               | 0.000 | -7.199               | -0.149               | 7.050                   | -7.199              | -0.149              | 7.050                  |
| NH <sub>2</sub>   | 0.000 | -7.031               | -0.071               | 6.960                   | -7.031              | -0.071              | 6.960                  |
| Ph                | 0.000 | -7.341               | -0.506               | 6.834                   | -7.341              | -0.506              | 6.834                  |
| BzTh              | 0.000 | -7.340               | -0.672               | 6.668                   | -7.340              | -0.672              | 6.668                  |
| Th                | 0.000 | -7.304               | -0.559               | 6.745                   | -7.304              | -0.559              | 6.745                  |

**Table S19** Calculated open-shell character  $y_0$ , orbital energies, H–L gaps of **Radical** substituted anthracenes (**An**). All values were obtained by LC-UBLYP( $\mu=0.33$ )/6-311G(d,p).

| <b>An</b>         | $y_0$ | $\alpha$ HOMO<br>/eV | $\alpha$ LUMO<br>/eV | $\alpha$ H–L gap<br>/eV | $\beta$ HOMO<br>/eV | $\beta$ LUMO<br>/eV | $\beta$ H–L gap<br>/eV |
|-------------------|-------|----------------------|----------------------|-------------------------|---------------------|---------------------|------------------------|
| NO <sub>2</sub>   | 0.070 | -6.997               | -0.196               | 6.801                   | -7.935              | -1.060              | 6.874                  |
| CN                | 0.055 | -7.932               | -1.144               | 6.788                   | -8.530              | -2.614              | 5.916                  |
| Cl                | 0.056 | -6.677               | -0.346               | 6.331                   | -7.655              | -1.226              | 6.428                  |
| H                 | 0.052 | -6.893               | -0.519               | 6.374                   | -7.764              | -1.608              | 6.155                  |
| CHO               | 0.045 | -7.464               | -0.798               | 6.666                   | -7.911              | -2.070              | 5.842                  |
| SiMe <sub>3</sub> | 0.035 | -7.171               | -0.355               | 6.816                   | -7.634              | -0.879              | 6.755                  |
| OMe               | 0.028 | -7.499               | -0.471               | 7.028                   | -7.394              | -0.395              | 6.998                  |
| NH <sub>2</sub>   | 0.012 | -7.575               | -0.645               | 6.930                   | -7.506              | -0.676              | 6.830                  |
| Ph                | 0.026 | -6.912               | -0.546               | 6.366                   | -7.316              | -0.995              | 6.321                  |
| BzTh              | 0.018 | -7.591               | -0.654               | 6.937                   | -7.484              | -1.022              | 6.462                  |
| Th                | 0.083 | -7.543               | -0.667               | 6.876                   | -7.247              | -0.509              | 6.738                  |



**Table S20** Calculated open-shell character  $y_0$ , orbital energies, H–L gaps of **Sat-Radical** substituted anthracenes (**An**). All values were obtained by LC-UBLYP( $\mu=0.33$ )/6-311G(d,p).

| <b>An</b>         | $y_0$ | $\alpha$ HOMO<br>/eV | $\alpha$ LUMO<br>/eV | $\alpha$ H–L gap<br>/eV | $\beta$ HOMO<br>/eV | $\beta$ LUMO<br>/eV | $\beta$ H–L gap<br>/eV |
|-------------------|-------|----------------------|----------------------|-------------------------|---------------------|---------------------|------------------------|
| NO <sub>2</sub>   | 0.000 | -7.462               | -0.044               | 7.417                   | -7.462              | -0.044              | 7.417                  |
| CN                | 0.001 | -7.438               | -0.075               | 7.362                   | -7.497              | -0.119              | 7.378                  |
| Cl                | 0.007 | -7.837               | -0.445               | 7.392                   | -7.852              | -2.428              | 5.424                  |
| H                 | 0.011 | -6.885               | -0.090               | 6.796                   | -7.498              | -0.504              | 6.995                  |
| CHO               | 0.008 | -7.192               | -0.152               | 7.039                   | -7.566              | -1.127              | 6.438                  |
| SiMe <sub>3</sub> | 0.015 | -7.693               | -0.305               | 7.388                   | -7.714              | -1.674              | 6.040                  |
| OMe               | 0.001 | -7.477               | -0.153               | 7.324                   | -7.578              | -0.200              | 7.378                  |
| NH <sub>2</sub>   | 0.020 | -7.498               | -0.091               | 7.407                   | -7.494              | -0.088              | 7.406                  |
| Ph                | 0.007 | -7.423               | -0.016               | 7.407                   | -7.421              | -0.243              | 7.178                  |
| BzTh              | 0.022 | -6.770               | -0.118               | 6.651                   | -7.514              | -0.904              | 6.610                  |
| Th                | 0.012 | -7.522               | -0.116               | 7.406                   | -7.517              | -1.050              | 6.467                  |

**Table S21** Calculated open-shell character  $y_0$ , orbital energies, H–L gaps of **Non-Radical** substituted pentacenes (**Pn**). All values were obtained by LC-UBLYP( $\mu=0.33$ )/6-311G(d,p).

| <b>Pn</b>         | $y_0$ | $\alpha$ HOMO<br>/eV | $\alpha$ LUMO<br>/eV | $\alpha$ H–L gap<br>/eV | $\beta$ HOMO<br>/eV | $\beta$ LUMO<br>/eV | $\beta$ H–L gap<br>/eV |
|-------------------|-------|----------------------|----------------------|-------------------------|---------------------|---------------------|------------------------|
| NO <sub>2</sub>   | 0.156 | -7.284               | -1.809               | 5.475                   | -7.388              | -1.523              | 5.865                  |
| CN                | 0.161 | -7.325               | -1.398               | 5.927                   | -7.238              | -1.634              | 5.604                  |
| Cl                | 0.158 | -6.950               | -1.164               | 5.786                   | -6.975              | -1.049              | 5.926                  |
| H                 | 0.157 | -6.952               | -1.003               | 5.949                   | -6.918              | -1.104              | 5.813                  |
| CHO               | 0.169 | -7.130               | -1.543               | 5.587                   | -7.210              | -1.303              | 5.907                  |
| SiMe <sub>3</sub> | 0.164 | -6.907               | -0.989               | 5.917                   | -6.887              | -1.105              | 5.781                  |
| OMe               | 0.167 | -6.718               | -0.872               | 5.846                   | -6.671              | -0.826              | 5.845                  |
| NH <sub>2</sub>   | 0.176 | -6.550               | -0.767               | 5.783                   | -6.635              | -0.792              | 5.844                  |
| Ph                | 0.176 | -6.846               | -1.146               | 5.699                   | -6.818              | -0.995              | 5.823                  |
| BzTh              | 0.183 | -6.883               | -1.259               | 5.624                   | -6.847              | -1.065              | 5.782                  |
| Th                | 0.184 | -6.806               | -1.011               | 5.795                   | -6.846              | -1.175              | 5.671                  |

**Table S22** Calculated open-shell character  $y_0$ , orbital energies, H–L gaps of **Radical** substituted pentacenes (**Pn**). All values were obtained by LC-UBLYP( $\mu=0.33$ )/6-311G(d,p).

| <b>Pn</b>         | $y_0$ | $\alpha$ HOMO<br>/eV | $\alpha$ LUMO<br>/eV | $\alpha$ H–L gap<br>/eV | $\beta$ HOMO<br>/eV | $\beta$ LUMO<br>/eV | $\beta$ H–L gap<br>/eV |
|-------------------|-------|----------------------|----------------------|-------------------------|---------------------|---------------------|------------------------|
| NO <sub>2</sub>   | 0.117 | -6.796               | -0.718               | 6.078                   | -7.503              | -1.122              | 6.381                  |
| CN                | 0.124 | -7.430               | -1.742               | 5.688                   | -8.041              | -2.355              | 5.686                  |
| Cl                | 0.175 | -6.646               | -0.882               | 5.764                   | -7.209              | -1.207              | 6.002                  |
| H                 | 0.190 | -6.803               | -1.097               | 5.706                   | -7.323              | -1.519              | 5.804                  |
| CHO               | 0.241 | -7.136               | -1.396               | 5.740                   | -7.454              | -1.937              | 5.517                  |
| SiMe <sub>3</sub> | 0.259 | -6.884               | -0.947               | 5.937                   | -7.142              | -1.062              | 6.080                  |
| OMe               | 0.215 | -6.953               | -0.970               | 5.983                   | -6.883              | -1.050              | 5.834                  |
| NH <sub>2</sub>   | 0.197 | -6.987               | -1.032               | 5.955                   | -6.909              | -1.214              | 5.695                  |
| Ph                | 0.210 | -6.898               | -0.987               | 5.911                   | -6.862              | -1.095              | 5.767                  |
| BzTh              | 0.207 | -7.025               | -1.061               | 5.964                   | -6.947              | -1.194              | 5.753                  |
| Th                | 0.284 | -7.000               | -0.967               | 6.034                   | -6.835              | -1.081              | 5.754                  |

**Table S23** Calculated open-shell character  $y_0$ , orbital energies, H–L gaps of **Sat-Radical** substituted pentacenes (**Pn**). All values were obtained by LC-UBLYP( $\mu=0.33$ )/6-311G(d,p).

| <b>Pn</b>         | $y_0$ | $\alpha$ HOMO<br>/eV | $\alpha$ LUMO<br>/eV | $\alpha$ H–L gap<br>/eV | $\beta$ HOMO<br>/eV | $\beta$ LUMO<br>/eV | $\beta$ H–L gap<br>/eV |
|-------------------|-------|----------------------|----------------------|-------------------------|---------------------|---------------------|------------------------|
| NO <sub>2</sub>   | 0.120 | -6.802               | -0.847               | 5.955                   | -6.798              | -0.862              | 5.935                  |
| CN                | 0.131 | -6.817               | -0.877               | 5.939                   | -6.845              | -0.870              | 5.975                  |
| Cl                | 0.147 | -7.096               | -1.192               | 5.904                   | -7.149              | -2.423              | 4.726                  |
| H                 | 0.128 | -6.767               | -0.887               | 5.880                   | -6.836              | -0.885              | 5.951                  |
| CHO               | 0.128 | -6.858               | -0.946               | 5.911                   | -6.898              | -1.160              | 5.738                  |
| SiMe <sub>3</sub> | 0.125 | -7.000               | -1.089               | 5.912                   | -7.030              | -1.679              | 5.351                  |
| OMe               | 0.133 | -6.859               | -0.932               | 5.927                   | -6.902              | -0.916              | 5.986                  |
| NH <sub>2</sub>   | 0.122 | -6.836               | -0.878               | 5.957                   | -6.826              | -0.899              | 5.928                  |
| Ph                | 0.121 | -6.750               | -0.794               | 5.956                   | -6.741              | -0.822              | 5.919                  |
| BzTh              | 0.121 | -6.783               | -0.898               | 5.885                   | -6.845              | -0.922              | 5.923                  |
| Th                | 0.121 | -6.847               | -0.885               | 5.962                   | -6.834              | -1.065              | 5.769                  |

**Table S24** Calculated open-shell character  $y_0$ , orbital energies, H–L gaps of **Non-Radical** substituted heptacenes (**Hp**). All values were obtained by LC-UBLYP( $\mu=0.33$ )/6-311G(d,p).

| <b>Hp</b>         | $y_0$ | $\alpha$ HOMO<br>/eV | $\alpha$ LUMO<br>/eV | $\alpha$ H–L gap<br>/eV | $\beta$ HOMO<br>/eV | $\beta$ LUMO<br>/eV | $\beta$ H–L gap<br>/eV |
|-------------------|-------|----------------------|----------------------|-------------------------|---------------------|---------------------|------------------------|
| NO <sub>2</sub>   | 0.548 | -7.317               | -1.362               | 5.955                   | -7.105              | -1.897              | 5.208                  |
| CN                | 0.559 | -7.085               | -1.727               | 5.359                   | -7.263              | -1.310              | 5.953                  |
| Cl                | 0.567 | -6.938               | -1.081               | 5.857                   | -6.881              | -1.269              | 5.612                  |
| H                 | 0.567 | -6.918               | -1.048               | 5.870                   | -6.852              | -1.214              | 5.638                  |
| CHO               | 0.563 | -7.157               | -1.226               | 5.931                   | -6.999              | -1.639              | 5.360                  |
| SiMe <sub>3</sub> | 0.571 | -6.875               | -1.032               | 5.843                   | -6.832              | -1.214              | 5.618                  |
| OMe               | 0.576 | -6.730               | -0.990               | 5.740                   | -6.652              | -0.933              | 5.720                  |
| NH <sub>2</sub>   | 0.582 | -6.684               | -0.911               | 5.773                   | -6.534              | -0.894              | 5.640                  |
| Ph                | 0.578 | -6.819               | -1.256               | 5.563                   | -6.793              | -1.028              | 5.765                  |
| BzTh              | 0.582 | -6.820               | -1.066               | 5.754                   | -6.850              | -1.363              | 5.487                  |
| Th                | 0.583 | -6.781               | -1.036               | 5.745                   | -6.824              | -1.281              | 5.542                  |

**Table S25** Calculated open-shell character  $y_0$ , orbital energies, H–L gaps of **Radical** substituted heptacenes (**Hp**). All values were obtained by LC-UBLYP( $\mu=0.33$ )/6-311G(d,p).

| <b>Hp</b>         | $y_0$ | $\alpha$ HOMO<br>/eV | $\alpha$ LUMO<br>/eV | $\alpha$ H–L gap<br>/eV | $\beta$ HOMO<br>/eV | $\beta$ LUMO<br>/eV | $\beta$ H–L gap<br>/eV |
|-------------------|-------|----------------------|----------------------|-------------------------|---------------------|---------------------|------------------------|
| NO <sub>2</sub>   | 0.127 | -6.794               | -0.878               | 5.916                   | -7.322              | -1.095              | 6.227                  |
| CN                | 0.159 | -7.249               | -1.862               | 5.386                   | -7.807              | -2.241              | 5.565                  |
| Cl                | 0.202 | -6.724               | -1.017               | 5.707                   | -7.086              | -1.127              | 5.958                  |
| H                 | 0.234 | -6.843               | -1.233               | 5.609                   | -7.200              | -1.430              | 5.771                  |
| CHO               | 0.354 | -7.055               | -1.527               | 5.528                   | -7.348              | -1.852              | 5.496                  |
| SiMe <sub>3</sub> | 0.414 | -6.856               | -1.080               | 5.776                   | -7.046              | -1.074              | 5.972                  |
| OMe               | 0.598 | -6.906               | -1.029               | 5.877                   | -6.834              | -1.176              | 5.658                  |
| NH <sub>2</sub>   | 0.500 | -6.897               | -1.064               | 5.832                   | -6.798              | -1.327              | 5.472                  |
| Ph                | 0.505 | -6.824               | -1.057               | 5.767                   | -6.794              | -1.225              | 5.569                  |
| BzTh              | 0.589 | -6.969               | -1.078               | 5.890                   | -6.876              | -1.313              | 5.564                  |
| Th                | 0.625 | -6.921               | -0.990               | 5.930                   | -6.785              | -1.208              | 5.577                  |

**Table S26** Calculated open-shell character  $y_0$ , orbital energies, H–L gaps of **Sat-Radical** substituted heptacenes (**Hp**). All values were obtained by LC-UBLYP( $\mu=0.33$ )/6-311G(d,p).

| <b>Hp</b>         | $y_0$ | $\alpha$ HOMO<br>/eV | $\alpha$ LUMO<br>/eV | $\alpha$ H–L gap<br>/eV | $\beta$ HOMO<br>/eV | $\beta$ LUMO<br>/eV | $\beta$ H–L gap<br>/eV |
|-------------------|-------|----------------------|----------------------|-------------------------|---------------------|---------------------|------------------------|
| NO <sub>2</sub>   | 0.549 | -6.783               | -0.959               | 5.824                   | -6.767              | -0.991              | 5.776                  |
| CN                | 0.545 | -6.784               | -1.011               | 5.773                   | -6.817              | -0.976              | 5.841                  |
| Cl                | 0.534 | -6.985               | -1.304               | 5.681                   | -7.085              | -2.425              | 4.660                  |
| H                 | 0.539 | -6.773               | -1.019               | 5.754                   | -6.804              | -0.980              | 5.825                  |
| CHO               | 0.539 | -6.822               | -1.076               | 5.746                   | -6.863              | -1.151              | 5.712                  |
| SiMe <sub>3</sub> | 0.546 | -6.927               | -1.208               | 5.719                   | -6.993              | -1.682              | 5.311                  |
| OMe               | 0.545 | -6.810               | -1.059               | 5.751                   | -6.861              | -1.004              | 5.857                  |
| NH <sub>2</sub>   | 0.548 | -6.813               | -0.981               | 5.831                   | -6.788              | -1.026              | 5.762                  |
| Ph                | 0.460 | -6.682               | -0.965               | 5.717                   | -6.693              | -0.929              | 5.764                  |
| BzTh              | 0.548 | -6.793               | -1.051               | 5.742                   | -6.827              | -0.996              | 5.831                  |
| Th                | 0.548 | -6.820               | -0.983               | 5.837                   | -6.791              | -1.078              | 5.713                  |

**Table S27** Calculated open-shell character  $y_0$ , orbital energies, H–L gaps of **Non-Radical** substituted nonacenes (**Nn**). All values were obtained by LC-UBLYP( $\mu=0.33$ )/6-311G(d,p).

| <b>Nn</b>         | $y_0$ | $\alpha$ HOMO<br>/eV | $\alpha$ LUMO<br>/eV | $\alpha$ H–L gap<br>/eV | $\beta$ HOMO<br>/eV | $\beta$ LUMO<br>/eV | $\beta$ H–L gap<br>/eV |
|-------------------|-------|----------------------|----------------------|-------------------------|---------------------|---------------------|------------------------|
| NO <sub>2</sub>   | 0.753 | -7.268               | -1.285               | 5.983                   | -7.087              | -1.856              | 5.231                  |
| CN                | 0.759 | -7.229               | -1.260               | 5.969                   | -7.073              | -1.689              | 5.384                  |
| Cl                | 0.763 | -6.903               | -1.261               | 5.642                   | -6.951              | -1.078              | 5.873                  |
| H                 | 0.763 | -6.877               | -1.210               | 5.668                   | -6.932              | -1.051              | 5.881                  |
| CHO               | 0.760 | -7.131               | -1.186               | 5.945                   | -6.998              | -1.608              | 5.390                  |
| SiMe <sub>3</sub> | 0.765 | -6.861               | -1.210               | 5.651                   | -6.894              | -1.036              | 5.858                  |
| OMe               | 0.768 | -6.781               | -1.010               | 5.771                   | -6.697              | -0.958              | 5.739                  |
| NH <sub>2</sub>   | 0.772 | -6.748               | -0.940               | 5.808                   | -6.588              | -0.928              | 5.661                  |
| Ph                | 0.768 | -6.854               | -1.250               | 5.604                   | -6.824              | -1.032              | 5.791                  |
| BzTh              | 0.770 | -6.846               | -1.061               | 5.785                   | -6.880              | -1.351              | 5.529                  |
| Th                | 0.771 | -6.811               | -1.038               | 5.773                   | -6.859              | -1.274              | 5.585                  |

**Table S28** Calculated open-shell character  $y_0$ , orbital energies, H–L gaps of **Radical** substituted nonacenes (**Nn**). All values were obtained by LC-UBLYP( $\mu=0.33$ )/6-311G(d,p).

| <b>Nn</b>         | $y_0$ | $\alpha$ HOMO<br>/eV | $\alpha$ LUMO<br>/eV | $\alpha$ H–L gap<br>/eV | $\beta$ HOMO<br>/eV | $\beta$ LUMO<br>/eV | $\beta$ H–L gap<br>/eV |
|-------------------|-------|----------------------|----------------------|-------------------------|---------------------|---------------------|------------------------|
| NO <sub>2</sub>   | 0.182 | -6.837               | -0.936               | 5.901                   | -7.164              | -1.074              | 6.091                  |
| CN                | 0.223 | -7.197               | -1.816               | 5.381                   | -7.483              | -2.224              | 5.259                  |
| Cl                | 0.258 | -6.805               | -1.044               | 5.761                   | -7.038              | -1.058              | 5.980                  |
| H                 | 0.293 | -6.896               | -1.238               | 5.658                   | -7.143              | -1.409              | 5.734                  |
| CHO               | 0.424 | -7.050               | -1.508               | 5.542                   | -7.280              | -1.843              | 5.437                  |
| SiMe <sub>3</sub> | 0.493 | -6.883               | -1.102               | 5.781                   | -7.014              | -1.072              | 5.942                  |
| OMe               | 0.776 | -6.917               | -1.037               | 5.880                   | -6.863              | -1.179              | 5.684                  |
| NH <sub>2</sub>   | 0.769 | -6.928               | -1.032               | 5.896                   | -6.853              | -1.311              | 5.542                  |
| Ph                | 0.764 | -6.857               | -1.314               | 5.543                   | -6.783              | -1.085              | 5.698                  |
| BzTh              | 0.761 | -6.894               | -1.393               | 5.501                   | -6.888              | -1.100              | 5.788                  |
| Th                | 0.801 | -6.901               | -0.988               | 5.913                   | -6.825              | -1.196              | 5.630                  |

**Table S29** Calculated open-shell character  $y_0$ , orbital energies, H–L gaps of **Sat-Radical** substituted nonacenes (**Nn**). All values were obtained by LC-UBLYP( $\mu=0.33$ )/6-311G(d,p).

| <b>Nn</b>         | $y_0$ | $\alpha$ HOMO<br>/eV | $\alpha$ LUMO<br>/eV | $\alpha$ H–L gap<br>/eV | $\beta$ HOMO<br>/eV | $\beta$ LUMO<br>/eV | $\beta$ H–L gap<br>/eV |
|-------------------|-------|----------------------|----------------------|-------------------------|---------------------|---------------------|------------------------|
| NO <sub>2</sub>   | 0.757 | -6.822               | -0.980               | 5.841                   | -6.807              | -1.014              | 5.794                  |
| CN                | 0.646 | -6.768               | -1.072               | 5.696                   | -6.798              | -1.033              | 5.766                  |
| Cl                | 0.723 | -6.976               | -1.297               | 5.679                   | -7.081              | -2.433              | 4.649                  |
| H                 | 0.742 | -6.819               | -1.038               | 5.781                   | -6.840              | -0.996              | 5.844                  |
| CHO               | 0.741 | -6.856               | -1.089               | 5.767                   | -6.894              | -1.151              | 5.743                  |
| SiMe <sub>3</sub> | 0.772 | -6.950               | -1.207               | 5.742                   | -7.019              | -1.687              | 5.332                  |
| OMe               | 0.761 | -6.845               | -1.069               | 5.776                   | -6.890              | -1.014              | 5.876                  |
| NH <sub>2</sub>   | 0.757 | -6.849               | -0.999               | 5.850                   | -6.825              | -1.045              | 5.780                  |
| Ph                | 0.757 | -6.760               | -0.931               | 5.829                   | -6.756              | -0.968              | 5.788                  |
| BzTh              | 0.756 | -6.801               | -1.012               | 5.790                   | -6.838              | -1.065              | 5.773                  |
| Th                | 0.756 | -6.827               | -1.053               | 5.774                   | -6.850              | -1.088              | 5.762                  |

**Table S30** Calculated open-shell character  $y_0$ , orbital energies, H–L gaps of **Non-Radical** substituted triangulenes (**Tri**). All values were obtained by LC-UBLYP( $\mu=0.33$ )/6-311G(d,p).

| <b>Tri</b>        | $y_0$ | $\alpha$ HOMO<br>/eV | $\alpha$ LUMO<br>/eV | $\alpha$ H–L gap<br>/eV | $\beta$ HOMO<br>/eV | $\beta$ LUMO<br>/eV | $\beta$ H–L gap<br>/eV |
|-------------------|-------|----------------------|----------------------|-------------------------|---------------------|---------------------|------------------------|
| NO <sub>2</sub>   | 1.000 | -6.776               | -2.332               | 4.444                   | -7.037              | -1.669              | 5.368                  |
| CN                | 1.000 | -6.951               | -1.629               | 5.321                   | -6.737              | -2.170              | 4.567                  |
| Cl                | 1.000 | -6.472               | -1.655               | 4.817                   | -6.529              | -1.393              | 5.136                  |
| H                 | 1.000 | -6.433               | -1.593               | 4.840                   | -6.503              | -1.359              | 5.144                  |
| CHO               | 0.986 | -6.831               | -1.531               | 5.300                   | -6.644              | -2.062              | 4.582                  |
| SiMe <sub>3</sub> | 1.000 | -6.455               | -1.331               | 5.124                   | -6.417              | -1.585              | 4.832                  |
| OMe               | 0.991 | -6.175               | -1.219               | 4.955                   | -6.302              | -1.303              | 4.999                  |
| NH <sub>2</sub>   | 1.000 | -6.038               | -1.164               | 4.874                   | -6.261              | -1.192              | 5.068                  |
| Ph                | 1.000 | -6.366               | -1.309               | 5.057                   | -6.419              | -1.611              | 4.808                  |
| BzTh              | 0.997 | -6.416               | -1.344               | 5.072                   | -6.471              | -1.726              | 4.745                  |
| Th                | 0.998 | -6.363               | -1.312               | 5.050                   | -6.437              | -1.635              | 4.801                  |

**Table S31** Calculated open-shell character  $y_0$ , orbital energies, H–L gaps of **Radical** substituted triangulenes (**Tri**). All values were obtained by LC-UBLYP( $\mu=0.33$ )/6-311G(d,p).

| <b>Tri</b>        | $y_0$ | $\alpha$ HOMO<br>/eV | $\alpha$ LUMO<br>/eV | $\alpha$ H–L gap<br>/eV | $\beta$ HOMO<br>/eV | $\beta$ LUMO<br>/eV | $\beta$ H–L gap<br>/eV |
|-------------------|-------|----------------------|----------------------|-------------------------|---------------------|---------------------|------------------------|
| NO <sub>2</sub>   | 0.143 | -6.793               | -0.776               | 6.017                   | -7.391              | -1.002              | 6.390                  |
| CN                | 0.194 | -7.344               | -2.269               | 5.075                   | -8.252              | -1.888              | 6.364                  |
| Cl                | 0.225 | -6.784               | -1.011               | 5.773                   | -6.988              | -0.952              | 6.036                  |
| H                 | 0.265 | -6.904               | -1.394               | 5.510                   | -7.160              | -1.159              | 6.002                  |
| CHO               | 0.412 | -7.113               | -1.838               | 5.274                   | -7.814              | -1.493              | 6.321                  |
| SiMe <sub>3</sub> | 0.492 | -6.890               | -0.567               | 6.323                   | -7.690              | -0.993              | 6.697                  |
| OMe               | 0.999 | -6.865               | -0.236               | 6.630                   | -8.301              | -1.114              | 7.187                  |
| NH <sub>2</sub>   | 0.953 | -6.902               | -0.336               | 6.566                   | -8.210              | -1.342              | 6.868                  |
| Ph                | 0.999 | -6.775               | -1.057               | 5.717                   | -6.896              | -1.223              | 5.673                  |
| BzTh              | 0.999 | -6.916               | -1.092               | 5.824                   | -7.889              | -1.345              | 6.544                  |
| Th                | 0.998 | -6.710               | -0.067               | 6.643                   | -7.652              | -1.393              | 6.259                  |



**Table S32** Calculated open-shell character  $y_0$ , orbital energies, H–L gaps of **Sat-Radical** substituted triangulenes (**Tri**). All values were obtained by LC-UBLYP( $\mu=0.33$ )/6-311G(d,p).

| <b>Tri</b>        | $y_0$ | $\alpha$ HOMO<br>/eV | $\alpha$ LUMO<br>/eV | $\alpha$ H–L gap<br>/eV | $\beta$ HOMO<br>/eV | $\beta$ LUMO<br>/eV | $\beta$ H–L gap<br>/eV |
|-------------------|-------|----------------------|----------------------|-------------------------|---------------------|---------------------|------------------------|
| NO <sub>2</sub>   | 1.000 | -6.317               | -1.315               | 5.002                   | -6.283              | -1.316              | 4.967                  |
| CN                | 0.894 | -6.826               | 0.567                | 7.394                   | -8.206              | -0.842              | 7.363                  |
| Cl                | 0.855 | -7.089               | -2.417               | 4.672                   | -8.754              | -1.209              | 7.545                  |
| H                 | 0.904 | -6.820               | -0.485               | 6.335                   | -6.934              | -0.859              | 6.075                  |
| CHO               | 0.870 | -6.391               | -1.417               | 4.974                   | -6.380              | -1.382              | 4.998                  |
| SiMe <sub>3</sub> | 0.930 | -6.998               | -1.676               | 5.322                   | -8.462              | -1.065              | 7.397                  |
| OMe               | 0.894 | -6.871               | 0.645                | 7.516                   | -7.967              | -0.922              | 7.045                  |
| NH <sub>2</sub>   | 0.998 | -6.819               | -0.058               | 6.761                   | -8.042              | -0.862              | 7.180                  |
| Ph                | 0.980 | -6.744               | -0.254               | 6.489                   | -8.310              | -0.799              | 7.511                  |
| BzTh              | 0.999 | -6.838               | -0.919               | 5.919                   | -6.782              | -0.885              | 5.897                  |
| Th                | 0.998 | -6.838               | -1.067               | 5.771                   | -7.858              | -0.886              | 6.972                  |



|    |   |   |            |           |           |
|----|---|---|------------|-----------|-----------|
| 44 | 1 | 0 | 7.384542   | 2.489703  | -0.000001 |
| 45 | 1 | 0 | 4.919059   | -2.492031 | 0.000004  |
| 46 | 1 | 0 | 4.919059   | 2.492031  | 0.000004  |
| 47 | 1 | 0 | 2.458208   | -2.493314 | 0.000008  |
| 48 | 1 | 0 | 2.458208   | 2.493314  | 0.000008  |
| 49 | 1 | 0 | 0.000000   | -2.493601 | 0.000010  |
| 50 | 1 | 0 | 0.000000   | 2.493601  | 0.000009  |
| 51 | 1 | 0 | -2.458208  | -2.493314 | 0.000008  |
| 52 | 1 | 0 | -2.458208  | 2.493314  | 0.000008  |
| 53 | 1 | 0 | -4.919059  | -2.492031 | 0.000004  |
| 54 | 1 | 0 | -4.919059  | 2.492031  | 0.000004  |
| 55 | 1 | 0 | -7.384542  | -2.489703 | -0.000002 |
| 56 | 1 | 0 | -7.384542  | 2.489703  | -0.000001 |
| 57 | 1 | 0 | -9.857548  | -2.490310 | -0.000008 |
| 58 | 1 | 0 | -11.981288 | -1.244387 | -0.000014 |
| 59 | 1 | 0 | -11.981288 | 1.244387  | -0.000014 |
| 60 | 1 | 0 | -9.857548  | 2.490310  | -0.000008 |

## Triangulene

| Center Number | Atomic Number | Atomic Type | Coordinates (Angstroms) |           |           |
|---------------|---------------|-------------|-------------------------|-----------|-----------|
|               |               |             | X                       | Y         | Z         |
| 1             | 6             | 0           | 0.309235                | 4.230513  | -0.000003 |
| 2             | 6             | 0           | 1.464973                | 3.458626  | -0.000002 |
| 3             | 6             | 0           | 1.392702                | 2.041038  | 0.000000  |
| 4             | 6             | 0           | 0.103697                | 1.418664  | 0.000001  |
| 5             | 6             | 0           | -1.081097               | 2.221858  | 0.000000  |
| 6             | 6             | 0           | -0.946453               | 3.634888  | -0.000002 |
| 7             | 6             | 0           | 0.000000                | 0.000001  | 0.000001  |
| 8             | 6             | 0           | -1.280448               | -0.619531 | 0.000000  |
| 9             | 6             | 0           | -2.463940               | 0.185601  | 0.000002  |
| 10            | 6             | 0           | -2.337639               | 1.587505  | 0.000001  |
| 11            | 6             | 0           | -1.383634               | -2.047190 | -0.000001 |
| 12            | 6             | 0           | -2.674677               | -2.637097 | -0.000004 |
| 13            | 6             | 0           | -3.818347               | -1.847444 | 0.000000  |
| 14            | 6             | 0           | -3.727746               | -0.460608 | 0.000006  |
| 15            | 6             | 0           | 2.543641                | 1.230701  | 0.000001  |
| 16            | 6             | 0           | 2.464739                | -0.174668 | 0.000001  |
| 17            | 6             | 0           | 1.176750                | -0.799145 | 0.000000  |
| 18            | 6             | 0           | 1.071233                | -2.226633 | 0.000000  |
| 19            | 6             | 0           | -0.206002               | -2.818209 | -0.000001 |
| 20            | 6             | 0           | 3.621137                | -0.997789 | 0.000002  |
| 21            | 6             | 0           | 3.509109                | -2.383059 | 0.000001  |
| 22            | 6             | 0           | 2.262768                | -2.998015 | 0.000000  |
| 23            | 1             | 0           | 0.388294                | 5.312045  | -0.000005 |
| 24            | 1             | 0           | 2.439691                | 3.933898  | -0.000003 |
| 25            | 1             | 0           | -1.841697               | 4.246849  | -0.000003 |
| 26            | 1             | 0           | -3.235459               | 2.197215  | 0.000004  |
| 27            | 1             | 0           | -2.757045               | -3.718380 | -0.000009 |
| 28            | 1             | 0           | -4.794511               | -2.319744 | -0.000002 |
| 29            | 1             | 0           | -4.626706               | 0.145882  | 0.000006  |
| 30            | 1             | 0           | 3.520582                | 1.703365  | 0.000003  |
| 31            | 1             | 0           | -0.285127               | -3.900600 | -0.000003 |
| 32            | 1             | 0           | 4.598738                | -0.528476 | 0.000002  |
| 33            | 1             | 0           | 4.406206                | -2.992303 | 0.000001  |
| 34            | 1             | 0           | 2.187023                | -4.079784 | -0.000001 |





|    |    |   |           |           |           |
|----|----|---|-----------|-----------|-----------|
| 9  | 6  | 0 | -1.397576 | 1.237176  | 0.000002  |
| 10 | 6  | 0 | -0.785288 | -0.046023 | 0.000002  |
| 11 | 6  | 0 | -3.438393 | 2.628272  | 0.000004  |
| 12 | 6  | 0 | -2.676509 | 3.762150  | 0.000004  |
| 13 | 6  | 0 | -1.258263 | 3.666588  | 0.000002  |
| 14 | 6  | 0 | -0.640954 | 2.445227  | 0.000001  |
| 15 | 6  | 0 | 0.627005  | -0.153154 | 0.000004  |
| 16 | 6  | 0 | 1.837118  | -0.249658 | 0.000005  |
| 17 | 6  | 0 | 3.236353  | -0.347916 | 0.000004  |
| 18 | 6  | 0 | 4.023908  | -1.481099 | 0.000018  |
| 19 | 6  | 0 | 5.413897  | -1.200332 | 0.000012  |
| 20 | 6  | 0 | 5.687611  | 0.139300  | -0.000006 |
| 21 | 16 | 0 | 4.244675  | 1.092983  | -0.000016 |
| 22 | 1  | 0 | -1.362486 | -4.630070 | -0.000003 |
| 23 | 1  | 0 | -3.844129 | -4.418224 | -0.000011 |
| 24 | 1  | 0 | -4.892185 | -2.186196 | -0.000009 |
| 25 | 1  | 0 | 0.058956  | -2.628384 | 0.000002  |
| 26 | 1  | 0 | -4.686661 | 0.250616  | 0.000000  |
| 27 | 1  | 0 | -4.521497 | 2.690352  | 0.000007  |
| 28 | 1  | 0 | -3.148011 | 4.738311  | 0.000007  |
| 29 | 1  | 0 | -0.662638 | 4.572450  | 0.000000  |
| 30 | 1  | 0 | 0.439809  | 2.380483  | -0.000001 |
| 31 | 1  | 0 | 3.602887  | -2.477031 | 0.000032  |
| 32 | 1  | 0 | 6.181684  | -1.962472 | 0.000022  |
| 33 | 1  | 0 | 6.650889  | 0.625748  | -0.000013 |

---







|    |   |   |           |           |           |    |   |   |           |           |           |
|----|---|---|-----------|-----------|-----------|----|---|---|-----------|-----------|-----------|
| 32 | 1 | 0 | -6.466959 | -2.440649 | -0.149713 | 16 | 6 | 0 | -0.653498 | -0.000002 | -0.000002 |
| 33 | 1 | 0 | -1.496423 | -2.503751 | -0.170321 | 17 | 6 | 0 | -2.044046 | -0.000001 | -0.000002 |
| 34 | 1 | 0 | -6.446555 | -0.000002 | -0.000006 | 18 | 7 | 0 | -2.822642 | -1.115535 | -0.030790 |
| 35 | 1 | 0 | -6.466963 | 2.440645  | 0.149702  | 19 | 6 | 0 | -4.276153 | -0.763055 | 0.182930  |
| 36 | 1 | 0 | -5.252454 | 4.582243  | 0.288709  | 20 | 6 | 0 | -4.276153 | 0.763054  | -0.182928 |
| 37 | 1 | 0 | -2.761992 | 4.604390  | 0.299827  | 21 | 7 | 0 | -2.822641 | 1.115534  | 0.030788  |
| 38 | 1 | 0 | -1.496427 | 2.503753  | 0.170330  | 22 | 8 | 0 | -2.418232 | 2.315108  | 0.050967  |
| 39 | 1 | 0 | 1.682666  | -2.120714 | 0.334654  | 23 | 8 | 0 | -2.418234 | -2.315110 | -0.050969 |
| 40 | 1 | 0 | 1.682667  | 2.120718  | -0.334646 | 24 | 6 | 0 | -4.566436 | -1.055817 | 1.664796  |
| 41 | 1 | 0 | 3.833363  | -3.349476 | 0.523025  | 25 | 6 | 0 | -5.144079 | -1.653917 | -0.703159 |
| 42 | 1 | 0 | 6.304664  | -3.339464 | 0.521650  | 26 | 6 | 0 | -4.566439 | 1.055817  | -1.664794 |
| 43 | 1 | 0 | 7.551935  | -1.230869 | 0.192218  | 27 | 6 | 0 | -5.144076 | 1.653917  | 0.703162  |
| 44 | 1 | 0 | 7.551935  | 1.230868  | -0.192229 | 28 | 1 | 0 | 2.183447  | 4.611995  | 0.077926  |
| 45 | 1 | 0 | 6.304665  | 3.339464  | -0.521656 | 29 | 1 | 0 | 4.673493  | 4.592656  | 0.077391  |
| 46 | 1 | 0 | 3.833364  | 3.349478  | -0.523023 | 30 | 1 | 0 | 5.893364  | 2.449403  | 0.041323  |

R=Ver

| Center Number | Atomic Number | Atomic Type | Coordinates (Angstroms) |           |           |    |   |   |           |           |           |
|---------------|---------------|-------------|-------------------------|-----------|-----------|----|---|---|-----------|-----------|-----------|
|               |               |             | X                       | Y         | Z         |    |   |   |           |           |           |
| 1             | 6             | 0           | 3.965205                | -3.664761 | 0.057000  | 31 | 1 | 0 | 0.916121  | 2.511625  | 0.043138  |
| 2             | 6             | 0           | 5.386833                | -3.653815 | 0.043952  | 32 | 1 | 0 | 5.871463  | 0.000002  | 0.000002  |
| 3             | 6             | 0           | 6.062344                | -2.466458 | 0.035238  | 33 | 1 | 0 | 5.893367  | -2.449399 | -0.041318 |
| 4             | 6             | 0           | 5.361487                | -1.221764 | 0.038610  | 34 | 1 | 0 | 4.673498  | -4.592653 | -0.077387 |
| 5             | 6             | 0           | 3.922229                | -1.233848 | 0.049546  | 35 | 1 | 0 | 2.183452  | -4.611996 | -0.077928 |
| 6             | 6             | 0           | 3.256041                | -2.494333 | 0.059392  | 36 | 1 | 0 | 0.916124  | -2.511627 | -0.043143 |
| 7             | 6             | 0           | 6.039713                | 0.000001  | 0.032239  | 37 | 1 | 0 | -5.617117 | -0.875275 | 1.899622  |
| 8             | 6             | 0           | 5.361485                | 1.221765  | 0.038642  | 38 | 1 | 0 | -4.340085 | -2.105272 | 1.858889  |
| 9             | 6             | 0           | 3.922227                | 1.233846  | 0.049582  | 39 | 1 | 0 | -3.949504 | -0.446084 | 2.327510  |
| 10            | 6             | 0           | 3.218997                | -0.000002 | 0.051637  | 40 | 1 | 0 | -4.977627 | -2.695248 | -0.427598 |
| 11            | 6             | 0           | 6.062340                | 2.466460  | 0.035311  | 41 | 1 | 0 | -6.200321 | -1.417239 | -0.554246 |
| 12            | 6             | 0           | 5.386827                | 3.653816  | 0.044061  | 42 | 1 | 0 | -4.904684 | -1.545760 | -1.760228 |
| 13            | 6             | 0           | 3.965199                | 3.664759  | 0.057108  | 43 | 1 | 0 | -5.617121 | 0.875275  | -1.899618 |
| 14            | 6             | 0           | 3.256037                | 2.494330  | 0.059464  | 44 | 1 | 0 | -4.340089 | 2.105272  | -1.858886 |
| 15            | 6             | 0           | 1.801743                | -0.000003 | 0.054383  | 45 | 1 | 0 | -3.949509 | 0.446083  | -2.327509 |
| 16            | 6             | 0           | 0.592470                | -0.000003 | 0.054268  | 46 | 1 | 0 | -4.977624 | 2.695248  | 0.427600  |
| 17            | 6             | 0           | -0.832818               | -0.000001 | 0.057352  | 47 | 1 | 0 | -6.200318 | 1.417239  | 0.554254  |
| 18            | 7             | 0           | -1.425296               | -1.194565 | 0.066453  | 48 | 1 | 0 | -4.904678 | 1.545761  | 1.760231  |
| 19            | 7             | 0           | -2.789228               | -1.173200 | 0.069382  |    |   |   |           |           |           |
| 20            | 6             | 0           | -3.560972               | 0.000001  | 0.025964  |    |   |   |           |           |           |
| 21            | 7             | 0           | -2.789226               | 1.173201  | 0.069369  |    |   |   |           |           |           |
| 22            | 7             | 0           | -1.425294               | 1.194564  | 0.066441  |    |   |   |           |           |           |
| 23            | 8             | 0           | -4.768271               | 0.000002  | -0.039850 |    |   |   |           |           |           |
| 24            | 6             | 0           | -3.408537               | 2.468463  | -0.011417 |    |   |   |           |           |           |
| 25            | 6             | 0           | -3.408542               | -2.468461 | -0.011385 |    |   |   |           |           |           |
| 26            | 6             | 0           | -2.758934               | -3.466176 | -0.742479 |    |   |   |           |           |           |
| 27            | 6             | 0           | -3.311232               | -4.739888 | -0.812842 |    |   |   |           |           |           |
| 28            | 6             | 0           | -4.507489               | -5.026730 | -0.158846 |    |   |   |           |           |           |
| 29            | 6             | 0           | -5.146465               | -4.028026 | 0.571882  |    |   |   |           |           |           |
| 30            | 6             | 0           | -4.605247               | -2.748693 | 0.652791  |    |   |   |           |           |           |
| 31            | 6             | 0           | -2.758926               | 3.466166  | -0.742526 |    |   |   |           |           |           |
| 32            | 6             | 0           | -3.311222               | 4.739878  | -0.812909 |    |   |   |           |           |           |
| 33            | 6             | 0           | -4.507480               | 5.026731  | -0.158921 |    |   |   |           |           |           |
| 34            | 6             | 0           | -5.146459               | 4.028040  | 0.571822  |    |   |   |           |           |           |
| 35            | 6             | 0           | -4.605243               | 2.748706  | 0.652751  |    |   |   |           |           |           |
| 36            | 1             | 0           | 3.439884                | -4.613060 | 0.066415  |    |   |   |           |           |           |
| 37            | 1             | 0           | 5.929708                | -4.592109 | 0.042010  |    |   |   |           |           |           |
| 38            | 1             | 0           | 7.146977                | -2.447329 | 0.026441  |    |   |   |           |           |           |
| 39            | 1             | 0           | 2.173252                | -2.509979 | 0.071761  |    |   |   |           |           |           |
| 40            | 1             | 0           | 7.125341                | 0.000002  | 0.023391  |    |   |   |           |           |           |
| 41            | 1             | 0           | 7.146974                | 2.447333  | 0.026514  |    |   |   |           |           |           |
| 42            | 1             | 0           | 5.929700                | 4.592110  | 0.042148  |    |   |   |           |           |           |
| 43            | 1             | 0           | 3.439877                | 4.613056  | 0.066551  |    |   |   |           |           |           |
| 44            | 1             | 0           | 2.173248                | 2.509973  | 0.071833  |    |   |   |           |           |           |
| 45            | 1             | 0           | -1.825262               | -3.236237 | -1.236283 |    |   |   |           |           |           |
| 46            | 1             | 0           | -2.804076               | -5.508299 | -1.384842 |    |   |   |           |           |           |
| 47            | 1             | 0           | -4.937301               | -6.019950 | -0.217243 |    |   |   |           |           |           |
| 48            | 1             | 0           | -6.074734               | -4.241516 | 1.089068  |    |   |   |           |           |           |
| 49            | 1             | 0           | -5.111226               | -1.979036 | 1.214538  |    |   |   |           |           |           |
| 50            | 1             | 0           | -1.825253               | 3.236217  | -1.236324 |    |   |   |           |           |           |
| 51            | 1             | 0           | -2.804062               | 5.508278  | -1.384920 |    |   |   |           |           |           |
| 52            | 1             | 0           | -4.937290               | 6.019951  | -0.217333 |    |   |   |           |           |           |
| 53            | 1             | 0           | -6.074729               | 4.241538  | 1.089001  |    |   |   |           |           |           |
| 54            | 1             | 0           | -5.111224               | 1.979058  | 1.214508  |    |   |   |           |           |           |

R=NN

| Center Number | Atomic Number | Atomic Type | Coordinates (Angstroms) |           |           |
|---------------|---------------|-------------|-------------------------|-----------|-----------|
|               |               |             | X                       | Y         | Z         |
| 1             | 6             | 0           | 2.709828                | 3.664487  | 0.061758  |
| 2             | 6             | 0           | 4.131299                | 3.654044  | 0.061503  |
| 3             | 6             | 0           | 4.808659                | 2.467456  | 0.041488  |
| 4             | 6             | 0           | 4.108337                | 1.222925  | 0.020450  |
| 5             | 6             | 0           | 2.669733                | 1.236285  | 0.020528  |
| 6             | 6             | 0           | 1.999715                | 2.494135  | 0.042095  |
| 7             | 6             | 0           | 4.785742                | 0.000001  | 0.000001  |
| 8             | 6             | 0           | 4.108339                | -1.222923 | -0.020449 |
| 9             | 6             | 0           | 2.669735                | -1.236285 | -0.020529 |
| 10            | 6             | 0           | 1.968924                | 0.000000  | -0.000001 |
| 11            | 6             | 0           | 4.808662                | -2.467453 | -0.041485 |
| 12            | 6             | 0           | 4.131303                | -3.654042 | -0.061501 |
| 13            | 6             | 0           | 2.709833                | -3.664487 | -0.061760 |
| 14            | 6             | 0           | 1.999718                | -2.494136 | -0.042098 |
| 15            | 6             | 0           | 0.558229                | -0.000001 | -0.000002 |







|    |   |   |           |           |           |
|----|---|---|-----------|-----------|-----------|
| 36 | 1 | 0 | 0.826454  | 2.558492  | 0.399573  |
| 37 | 1 | 0 | 0.080093  | -0.879933 | 1.156705  |
| 38 | 1 | 0 | 0.087643  | 0.862533  | 1.193834  |
| 39 | 1 | 0 | -0.274115 | 0.937199  | -1.288261 |
| 40 | 1 | 0 | -0.265433 | -0.841075 | -1.330106 |
| 41 | 1 | 0 | -5.074254 | -0.904858 | 2.177836  |
| 42 | 1 | 0 | -3.815350 | -2.122398 | 1.896828  |
| 43 | 1 | 0 | -3.360947 | -0.461777 | 2.295520  |
| 44 | 1 | 0 | -4.820509 | -2.722254 | -0.240446 |
| 45 | 1 | 0 | -6.082816 | -1.482012 | -0.123735 |
| 46 | 1 | 0 | -5.034493 | -1.566578 | -1.552539 |
| 47 | 1 | 0 | -4.636956 | 2.102299  | -1.716172 |
| 48 | 1 | 0 | -4.350908 | 0.450154  | -2.274208 |
| 49 | 1 | 0 | -5.875591 | 0.858124  | -1.464293 |
| 50 | 1 | 0 | -4.706498 | 2.686342  | 0.647494  |
| 51 | 1 | 0 | -5.868077 | 1.409924  | 1.055685  |
| 52 | 1 | 0 | -4.327745 | 1.536538  | 1.926701  |

---















|    |   |   |          |           |          |
|----|---|---|----------|-----------|----------|
| 64 | 1 | 0 | 5.794563 | -6.017279 | 0.226265 |
| 65 | 1 | 0 | 3.672012 | -5.499430 | 1.410367 |
| 66 | 1 | 0 | 2.691019 | -3.228180 | 1.257141 |

R=NN

| Center<br>Number | Atomic<br>Number | Atomic<br>Type | Coordinates (Angstroms) |           |           |
|------------------|------------------|----------------|-------------------------|-----------|-----------|
|                  |                  |                | X                       | Y         | Z         |
| 1                | 6                | 0              | -1.957632               | 3.686826  | -0.019705 |
| 2                | 6                | 0              | -3.406586               | 3.674828  | -0.019957 |
| 3                | 6                | 0              | -4.068611               | 2.454676  | -0.013295 |
| 4                | 6                | 0              | -3.371309               | 1.227165  | -0.006351 |
| 5                | 6                | 0              | -1.920800               | 1.242277  | -0.006036 |
| 6                | 6                | 0              | -1.259097               | 2.482634  | -0.012908 |
| 7                | 6                | 0              | -4.047315               | 0.000006  | 0.000000  |
| 8                | 6                | 0              | -3.371313               | -1.227156 | 0.006351  |
| 9                | 6                | 0              | -1.920804               | -1.242272 | 0.006036  |
| 10               | 6                | 0              | -1.217214               | 0.000001  | -0.000001 |
| 11               | 6                | 0              | -4.068619               | -2.454665 | 0.013295  |
| 12               | 6                | 0              | -3.406598               | -3.674819 | 0.019958  |
| 13               | 6                | 0              | -1.957644               | -3.686821 | 0.019705  |
| 14               | 6                | 0              | -1.259105               | -2.482632 | 0.012908  |
| 15               | 6                | 0              | -4.102147               | -4.927581 | 0.027287  |
| 16               | 6                | 0              | -3.418655               | -6.107443 | 0.033912  |
| 17               | 6                | 0              | -1.989441               | -6.119142 | 0.033736  |
| 18               | 6                | 0              | -1.285142               | -4.950665 | 0.026862  |
| 19               | 6                | 0              | -1.285124               | 4.950667  | -0.026862 |
| 20               | 6                | 0              | -1.989419               | 6.119146  | -0.033736 |
| 21               | 6                | 0              | -3.418633               | 6.107452  | -0.033912 |
| 22               | 6                | 0              | -4.102130               | 4.927592  | -0.027286 |
| 23               | 6                | 0              | 0.185812                | -0.000001 | -0.000001 |
| 24               | 6                | 0              | 1.399867                | -0.000003 | -0.000001 |
| 25               | 6                | 0              | 2.786760                | -0.000004 | -0.000001 |
| 26               | 7                | 0              | 3.568159                | 1.116181  | -0.010745 |
| 27               | 6                | 0              | 5.020318                | 0.758866  | 0.199526  |
| 28               | 6                | 0              | 5.020317                | -0.758880 | -0.199525 |
| 29               | 7                | 0              | 3.568157                | -1.116190 | 0.010744  |
| 30               | 8                | 0              | 3.163767                | -2.316372 | 0.007813  |
| 31               | 8                | 0              | 3.163770                | 2.316364  | -0.007813 |
| 32               | 6                | 0              | 5.307448                | 1.018181  | 1.688288  |
| 33               | 6                | 0              | 5.891690                | 1.667713  | -0.664640 |
| 34               | 6                | 0              | 5.307448                | -1.018195 | -1.688287 |
| 35               | 6                | 0              | 5.891686                | -1.667728 | 0.664641  |
| 36               | 1                | 0              | -5.154012               | 2.436478  | -0.013627 |
| 37               | 1                | 0              | -0.174769               | 2.503396  | -0.013304 |
| 38               | 1                | 0              | -5.132838               | 0.000007  | 0.000000  |
| 39               | 1                | 0              | -5.154020               | -2.436464 | 0.013628  |
| 40               | 1                | 0              | -0.174777               | -2.503397 | 0.013302  |
| 41               | 1                | 0              | -5.187072               | -4.917283 | 0.027516  |
| 42               | 1                | 0              | -3.956500               | -7.048796 | 0.039473  |
| 43               | 1                | 0              | -1.467431               | -7.069300 | 0.039246  |
| 44               | 1                | 0              | -0.200553               | -4.956646 | 0.026901  |
| 45               | 1                | 0              | -0.200535               | 4.956645  | -0.026902 |
| 46               | 1                | 0              | -1.467406               | 7.069302  | -0.039246 |
| 47               | 1                | 0              | -3.956475               | 7.048807  | -0.039472 |
| 48               | 1                | 0              | -5.187055               | 4.917298  | -0.027515 |
| 49               | 1                | 0              | 6.357634                | 0.832516  | 1.921400  |
| 50               | 1                | 0              | 5.080576                | 2.062980  | 1.905635  |
| 51               | 1                | 0              | 4.689102                | 0.393558  | 2.335650  |
| 52               | 1                | 0              | 5.727190                | 2.702960  | -0.365946 |
| 53               | 1                | 0              | 6.947170                | 1.425403  | -0.519383 |
| 54               | 1                | 0              | 5.653781                | 1.584004  | -1.724260 |
| 55               | 1                | 0              | 6.357633                | -0.832531 | -1.921399 |
| 56               | 1                | 0              | 5.080574                | -2.062994 | -1.905634 |
| 57               | 1                | 0              | 4.689101                | -0.393573 | -2.335650 |
| 58               | 1                | 0              | 5.727185                | -2.702974 | 0.365947  |
| 59               | 1                | 0              | 6.947167                | -1.425420 | 0.519384  |
| 60               | 1                | 0              | 5.653777                | -1.584019 | 1.724261  |





|    |   |   |           |           |           |    |   |   |           |           |           |
|----|---|---|-----------|-----------|-----------|----|---|---|-----------|-----------|-----------|
| 32 | 1 | 0 | -2.560174 | 1.546796  | 0.439784  | 21 | 7 | 0 | -2.833294 | -2.523276 | -0.666956 |
| 33 | 1 | 0 | -0.859397 | 2.282735  | 1.119674  | 22 | 6 | 0 | -4.558495 | -3.901353 | 0.417530  |
| 34 | 1 | 0 | 0.875763  | 2.165057  | 1.227535  | 23 | 6 | 0 | -4.974107 | -2.755994 | -1.766001 |
| 35 | 1 | 0 | 1.002706  | 2.319888  | -1.318771 | 24 | 6 | 0 | -5.948675 | -0.579287 | -0.074688 |
| 36 | 1 | 0 | -0.713313 | 2.754716  | -1.309751 | 25 | 6 | 0 | -4.629051 | -1.388703 | 1.895983  |
| 37 | 1 | 0 | 0.078991  | 6.140691  | -0.360673 | 26 | 8 | 0 | -3.360795 | 0.775431  | 0.217276  |
| 38 | 1 | 0 | -1.197181 | 5.079267  | -1.018940 | 27 | 6 | 0 | 3.343572  | -4.118052 | 0.219014  |
| 39 | 1 | 0 | -0.876533 | 5.120474  | 0.737022  | 28 | 6 | 0 | 4.499945  | -4.830697 | 0.115238  |
| 40 | 1 | 0 | -5.089868 | -3.322236 | -0.368116 | 29 | 6 | 0 | 5.753609  | -4.163189 | -0.065891 |
| 41 | 1 | 0 | -7.185106 | -2.040394 | -0.213182 | 30 | 6 | 0 | 5.809515  | -2.804277 | -0.138632 |
| 42 | 1 | 0 | -7.133699 | 0.419862  | 0.170246  | 31 | 6 | 0 | 1.288436  | 5.935209  | -0.224526 |
| 43 | 1 | 0 | -4.991728 | 1.603934  | 0.399629  | 32 | 6 | 0 | 0.144334  | 6.672902  | -0.176043 |
| 44 | 1 | 0 | 4.947685  | 1.258214  | 0.375868  | 33 | 6 | 0 | -1.126072 | 6.036215  | -0.000627 |
| 45 | 1 | 0 | 7.005639  | -0.073241 | 0.155936  | 34 | 6 | 0 | -1.211999 | 4.682132  | 0.123166  |
| 46 | 1 | 0 | 6.886651  | -2.534323 | -0.204362 | 35 | 1 | 0 | 4.450888  | 2.028612  | -0.256283 |
| 47 | 1 | 0 | 4.708690  | -3.670848 | -0.349346 | 36 | 1 | 0 | -1.083445 | 2.036128  | 0.332173  |

R=Sat-Allyl

| Center Number | Atomic Number | Atomic Type | Coordinates (Angstroms) |           |           |
|---------------|---------------|-------------|-------------------------|-----------|-----------|
|               |               |             | X                       | Y         | Z         |
| 1             | 6             | 0           | -1.226094               | -0.222175 | -0.211299 |
| 2             | 6             | 0           | -1.219206               | -1.654045 | 0.057263  |
| 3             | 6             | 0           | 0.000005                | -2.323561 | 0.179247  |
| 4             | 6             | 0           | 1.219214                | -1.654042 | 0.057262  |
| 5             | 6             | 0           | 1.226099                | -0.222172 | -0.211300 |
| 6             | 6             | 0           | 0.000002                | 0.474981  | -0.354484 |
| 7             | 6             | 0           | -2.489888               | 0.410579  | -0.312876 |
| 8             | 6             | 0           | -3.686810               | -0.277713 | -0.173745 |
| 9             | 6             | 0           | -3.668013               | -1.703938 | 0.086760  |
| 10            | 6             | 0           | -2.445448               | -2.344179 | 0.193196  |
| 11            | 6             | 0           | 2.445458                | -2.344173 | 0.193196  |
| 12            | 6             | 0           | 3.668022                | -1.703929 | 0.086760  |
| 13            | 6             | 0           | 3.686815                | -0.277703 | -0.173743 |
| 14            | 6             | 0           | 2.489892                | 0.410585  | -0.312875 |
| 15            | 6             | 0           | -0.000001               | 1.964961  | -0.621064 |
| 16            | 6             | 0           | -0.000006               | 2.817644  | 0.674423  |
| 17            | 6             | 0           | -0.000017               | 4.309519  | 0.383317  |
| 18            | 6             | 0           | 1.211188                | 4.971851  | 0.239415  |
| 19            | 6             | 0           | -1.211232               | 4.971838  | 0.239438  |
| 20            | 6             | 0           | 4.918340                | -2.393557 | 0.225142  |
| 21            | 6             | 0           | 6.101285                | -1.727524 | 0.115198  |
| 22            | 6             | 0           | 6.121630                | -0.319233 | -0.142047 |
| 23            | 6             | 0           | 4.958943                | 0.377032  | -0.280669 |
| 24            | 6             | 0           | -4.958939               | 0.377018  | -0.280672 |
| 25            | 6             | 0           | -6.121625               | -0.319249 | -0.142050 |
| 26            | 6             | 0           | -6.101276               | -1.727539 | 0.115196  |
| 27            | 6             | 0           | -4.918329               | -2.393569 | 0.225141  |
| 28            | 1             | 0           | 0.000007                | -3.390405 | 0.378971  |
| 29            | 1             | 0           | -2.543798               | 1.474359  | -0.503951 |
| 30            | 1             | 0           | -2.418081               | -3.411644 | 0.389679  |
| 31            | 1             | 0           | 2.418094                | -3.411637 | 0.389679  |
| 32            | 1             | 0           | 2.543799                | 1.474366  | -0.503948 |
| 33            | 1             | 0           | 0.865602                | 2.242303  | -1.225204 |
| 34            | 1             | 0           | -0.865602               | 2.242298  | -1.225211 |
| 35            | 1             | 0           | -0.876665               | 2.556313  | 1.273271  |
| 36            | 1             | 0           | 0.876659                | 2.556327  | 1.273268  |
| 37            | 1             | 0           | 1.247558                | 6.028123  | -0.000518 |
| 38            | 1             | 0           | 2.156052                | 4.459552  | 0.375861  |
| 39            | 1             | 0           | -1.247617               | 6.028108  | -0.000494 |
| 40            | 1             | 0           | -2.156085               | 4.459524  | 0.375899  |
| 41            | 1             | 0           | 4.900653                | -3.460740 | 0.420169  |
| 42            | 1             | 0           | 7.039643                | -2.259958 | 0.221793  |
| 43            | 1             | 0           | 7.075217                | 0.189679  | -0.226259 |
| 44            | 1             | 0           | 4.975627                | 1.444143  | -0.476743 |
| 45            | 1             | 0           | -4.975626               | 1.444129  | -0.476747 |
| 46            | 1             | 0           | -7.075212               | 0.189661  | -0.226263 |
| 47            | 1             | 0           | -7.039632               | -2.259976 | 0.221791  |
| 48            | 1             | 0           | -4.900640               | -3.460752 | 0.420169  |

R=Sat-Phen

| Center Number | Atomic Number | Atomic Type | Coordinates (Angstroms) |           |           |
|---------------|---------------|-------------|-------------------------|-----------|-----------|
|               |               |             | X                       | Y         | Z         |
| 1             | 6             | 0           | -2.263480               | 1.226200  | -0.204810 |
| 2             | 6             | 0           | -3.704307               | 1.219211  | 0.010551  |
| 3             | 6             | 0           | -4.377769               | -0.000006 | 0.108017  |
| 4             | 6             | 0           | -3.704302               | -1.219220 | 0.010548  |
| 5             | 6             | 0           | -2.263475               | -1.226204 | -0.204813 |
| 6             | 6             | 0           | -1.561435               | -0.000001 | -0.321109 |
| 7             | 6             | 0           | -1.627880               | 2.490146  | -0.283921 |
| 8             | 6             | 0           | -2.321119               | 3.687007  | -0.171008 |
| 9             | 6             | 0           | -3.755834               | 3.667995  | 0.037477  |
| 10            | 6             | 0           | -4.399226               | 2.445303  | 0.120794  |
| 11            | 6             | 0           | -4.399217               | -2.445315 | 0.120789  |
| 12            | 6             | 0           | -3.755820               | -3.668005 | 0.037470  |
| 13            | 6             | 0           | -2.321105               | -3.687011 | -0.171015 |
| 14            | 6             | 0           | -1.627871               | -2.490148 | -0.283926 |
| 15            | 6             | 0           | -0.062111               | 0.000002  | -0.527566 |
| 16            | 6             | 0           | 0.736500                | 0.000000  | 0.004317  |
| 17            | 6             | 0           | 2.232790                | 0.000002  | 0.584286  |
| 18            | 6             | 0           | 2.931601                | -1.201667 | 0.463878  |
| 19            | 6             | 0           | 4.325364                | -1.234199 | 0.217687  |
| 20            | 6             | 0           | 5.031825                | 0.000006  | 0.091208  |
| 21            | 6             | 0           | 4.325357                | 1.234209  | 0.217668  |
| 22            | 6             | 0           | 2.931595                | 1.201673  | 0.463859  |
| 23            | 6             | 0           | 6.438888                | 0.000008  | -0.155113 |
| 24            | 6             | 0           | 7.110351                | 1.241985  | -0.271704 |
| 25            | 6             | 0           | 6.415930                | 2.439641  | -0.146292 |
| 26            | 6             | 0           | 5.047070                | 2.447465  | 0.095500  |
| 27            | 6             | 0           | 5.047084                | -2.447454 | 0.095538  |
| 28            | 6             | 0           | 6.415943                | -2.439626 | -0.146254 |
| 29            | 6             | 0           | 7.110358                | -1.241967 | -0.271686 |
| 30            | 6             | 0           | -1.663403               | -4.959274 | -0.255400 |
| 31            | 6             | 0           | -2.364582               | -6.121826 | -0.142866 |
| 32            | 6             | 0           | -3.781197               | -6.101241 | 0.063524  |
| 33            | 6             | 0           | -4.450400               | -4.918153 | 0.150082  |
| 34            | 6             | 0           | -4.450418               | 4.918140  | 0.150091  |
| 35            | 6             | 0           | -3.781219               | 6.101231  | 0.063534  |
| 36            | 6             | 0           | -2.364604               | 6.121821  | -0.142856 |
| 37            | 6             | 0           | -1.663421               | 4.959272  | -0.255392 |
| 38            | 1             | 0           | -5.451199               | -0.000008 | 0.268568  |
| 39            | 1             | 0           | -0.558020               | 2.544441  | -0.437186 |
| 40            | 1             | 0           | -5.473179               | 2.417709  | 0.277878  |
| 41            | 1             | 0           | -5.473171               | -2.417725 | 0.277873  |
| 42            | 1             | 0           | -0.558011               | -2.544438 | -0.437190 |
| 43            | 1             | 0           | 0.240376                | -0.865446 | -1.119582 |
| 44            | 1             | 0           | 0.240374                | 0.865453  | -1.119579 |
| 45            | 1             | 0           | 0.447200                | 0.876568  | 1.390880  |
| 46            | 1             | 0           | 0.447203                | -0.876573 | 1.390875  |
| 47            | 1             | 0           | 2.401560                | -2.143387 | 0.570844  |











|    |    |   |           |           |           |    |   |   |           |          |           |
|----|----|---|-----------|-----------|-----------|----|---|---|-----------|----------|-----------|
| 30 | 6  | 0 | 7.480290  | -0.551861 | -0.000007 | 57 | 1 | 0 | -1.341203 | 7.501239 | -0.000074 |
| 31 | 6  | 0 | 0.0029250 | 0.792069  | 0.000002  |    |   |   |           |          |           |
| 32 | 6  | 0 | 0.002839  | 2.008763  | 0.000003  |    |   |   |           |          |           |
| 33 | 6  | 0 | -0.052495 | 3.406668  | 0.000003  |    |   |   |           |          |           |
| 34 | 6  | 0 | 0.987163  | 4.301528  | 0.000037  |    |   |   |           |          |           |
| 35 | 6  | 0 | 0.570569  | 5.668351  | 0.000026  |    |   |   |           |          |           |
| 36 | 6  | 0 | -0.840695 | 5.799357  | -0.000020 |    |   |   |           |          |           |
| 37 | 16 | 0 | -1.626236 | 4.232155  | -0.000047 |    |   |   |           |          |           |
| 38 | 6  | 0 | 1.357940  | 6.835281  | 0.000053  |    |   |   |           |          |           |
| 39 | 6  | 0 | 0.744053  | 8.075481  | 0.000035  |    |   |   |           |          |           |
| 40 | 6  | 0 | -0.657137 | 8.183668  | -0.000010 |    |   |   |           |          |           |
| 41 | 6  | 0 | -1.458906 | 7.050563  | -0.000038 |    |   |   |           |          |           |
| 42 | 1  | 0 | -9.461491 | -1.140383 | 0.000006  |    |   |   |           |          |           |
| 43 | 1  | 0 | -9.376584 | -3.627807 | 0.000005  |    |   |   |           |          |           |
| 44 | 1  | 0 | -7.212686 | -4.801371 | 0.000003  |    |   |   |           |          |           |
| 45 | 1  | 0 | -7.381829 | 0.177618  | 0.000005  |    |   |   |           |          |           |
| 46 | 1  | 0 | -4.740523 | -4.716154 | 0.000002  |    |   |   |           |          |           |
| 47 | 1  | 0 | -4.911422 | 0.262232  | 0.000004  |    |   |   |           |          |           |
| 48 | 1  | 0 | -2.266889 | -4.620775 | 0.000002  |    |   |   |           |          |           |
| 49 | 1  | 0 | -2.461485 | 0.351663  | 0.000003  |    |   |   |           |          |           |
| 50 | 1  | 0 | 0.158622  | -4.541835 | 0.000003  |    |   |   |           |          |           |
| 51 | 1  | 0 | 2.585035  | -4.504143 | 0.000003  |    |   |   |           |          |           |
| 52 | 1  | 0 | 2.539561  | 0.471769  | -0.000002 |    |   |   |           |          |           |
| 53 | 1  | 0 | 5.060003  | -4.480970 | 0.000002  |    |   |   |           |          |           |
| 54 | 1  | 0 | 4.993365  | 0.499515  | -0.000005 |    |   |   |           |          |           |
| 55 | 1  | 0 | 7.533378  | -4.448252 | -0.000001 |    |   |   |           |          |           |
| 56 | 1  | 0 | 9.638943  | -3.172926 | -0.000006 |    |   |   |           |          |           |
| 57 | 1  | 0 | 9.605085  | -0.684273 | -0.000010 |    |   |   |           |          |           |
| 58 | 1  | 0 | 7.465166  | 0.533023  | -0.000009 |    |   |   |           |          |           |
| 59 | 1  | 0 | 2.021904  | 3.986411  | 0.000070  |    |   |   |           |          |           |
| 60 | 1  | 0 | 2.439318  | 6.754652  | 0.000088  |    |   |   |           |          |           |
| 61 | 1  | 0 | 1.348068  | 8.975422  | 0.000056  |    |   |   |           |          |           |
| 62 | 1  | 0 | -1.119475 | 9.163944  | -0.000024 |    |   |   |           |          |           |
| 63 | 1  | 0 | -2.538986 | 7.137813  | -0.000073 |    |   |   |           |          |           |

R=Th

| Center Number | Atomic Number | Atomic Type | Coordinates (Angstroms) |           |           |
|---------------|---------------|-------------|-------------------------|-----------|-----------|
|               |               |             | X                       | Y         | Z         |
| 1             | 6             | 0           | 8.661089                | -0.458045 | -0.000009 |
| 2             | 6             | 0           | 8.677298                | -1.883483 | -0.000002 |
| 3             | 6             | 0           | 7.507516                | -2.590018 | 0.000002  |
| 4             | 6             | 0           | 6.243587                | -1.922364 | 0.000000  |
| 5             | 6             | 0           | 6.227307                | -0.474766 | -0.000007 |
| 6             | 6             | 0           | 7.475114                | 0.221394  | -0.000011 |
| 7             | 6             | 0           | 5.033794                | -2.616682 | 0.000003  |
| 8             | 6             | 0           | 3.794829                | -1.950268 | 0.000001  |
| 9             | 6             | 0           | 3.778339                | -0.498654 | -0.000004 |
| 10            | 6             | 0           | 5.001439                | 0.192687  | -0.000008 |
| 11            | 6             | 0           | 2.568042                | -2.634759 | 0.000001  |
| 12            | 6             | 0           | 1.336024                | -1.964883 | -0.000001 |
| 13            | 6             | 0           | 1.320184                | -0.507257 | 0.000001  |
| 14            | 6             | 0           | 2.538925                | 0.172174  | -0.000003 |
| 15            | 6             | 0           | 0.120689                | -2.668009 | -0.000006 |
| 16            | 6             | 0           | -1.123965               | -2.018223 | -0.000005 |
| 17            | 6             | 0           | -1.171287               | -0.561285 | 0.000007  |
| 18            | 6             | 0           | 0.059088                | 0.176459  | 0.000007  |
| 19            | 6             | 0           | -2.325799               | -2.740910 | -0.000013 |
| 20            | 6             | 0           | -3.581088               | -2.110210 | -0.000006 |
| 21            | 6             | 0           | -3.627459               | -0.659278 | 0.000013  |
| 22            | 6             | 0           | -2.418343               | 0.064682  | 0.000018  |
| 23            | 6             | 0           | -4.790080               | -2.829556 | -0.000015 |
| 24            | 6             | 0           | -6.028663               | -2.187980 | -0.000005 |
| 25            | 6             | 0           | -6.074881               | -0.741016 | 0.000016  |
| 26            | 6             | 0           | -4.879086               | -0.021047 | 0.000024  |
| 27            | 6             | 0           | -7.262620               | -2.909528 | -0.000013 |
| 28            | 6             | 0           | -8.461740               | -2.254017 | -0.000003 |
| 29            | 6             | 0           | -8.507051               | -0.829203 | 0.000018  |
| 30            | 6             | 0           | -7.351503               | -0.099214 | 0.000027  |
| 31            | 6             | 0           | 0.028016                | 1.582542  | 0.000013  |
| 32            | 6             | 0           | 0.004739                | 2.799137  | 0.000016  |
| 33            | 6             | 0           | -0.035796               | 4.198132  | 0.000018  |
| 34            | 6             | 0           | 1.014868                | 5.095571  | 0.000107  |
| 35            | 6             | 0           | 0.598090                | 6.449893  | 0.000078  |
| 36            | 6             | 0           | -0.762565               | 6.590356  | -0.000031 |
| 37            | 16            | 0           | -1.570029               | 5.060685  | -0.000103 |
| 38            | 1             | 0           | 9.599699                | 0.084440  | -0.000012 |
| 39            | 1             | 0           | 9.628097                | -2.404358 | 0.000000  |
| 40            | 1             | 0           | 7.519636                | -3.674950 | 0.000007  |
| 41            | 1             | 0           | 7.462351                | 1.306327  | -0.000016 |
| 42            | 1             | 0           | 5.046148                | -3.702288 | 0.000008  |
| 43            | 1             | 0           | 4.990345                | 1.278244  | -0.000013 |
| 44            | 1             | 0           | 2.571190                | -3.720179 | 0.000002  |
| 45            | 1             | 0           | 2.536122                | 1.255688  | -0.000004 |
| 46            | 1             | 0           | 0.144226                | -3.753014 | -0.000011 |
| 47            | 1             | 0           | -2.281861               | -3.825448 | -0.000023 |
| 48            | 1             | 0           | -2.463621               | 1.147232  | 0.000030  |
| 49            | 1             | 0           | -4.755601               | -3.914687 | -0.000030 |
| 50            | 1             | 0           | -4.914553               | 1.063933  | 0.000039  |
| 51            | 1             | 0           | -7.227990               | -3.993978 | -0.000029 |
| 52            | 1             | 0           | -9.389207               | -2.815405 | -0.000009 |
| 53            | 1             | 0           | -9.468184               | -0.327708 | 0.000026  |
| 54            | 1             | 0           | -7.385333               | 0.985235  | 0.000042  |
| 55            | 1             | 0           | 2.047483                | 4.775067  | 0.000191  |
| 56            | 1             | 0           | 1.280412                | 7.289407  | 0.000136  |

Radical

R=Mt

Table with columns: Center Number, Atomic Number, Atomic Type, Coordinates (X, Y, Z). Rows 1-52.

R=DCM

Table with columns: Center Number, Atomic Number, Atomic Type, Coordinates (X, Y, Z). Rows 1-31.

Table with columns: Center Number, Atomic Number, Atomic Type, Coordinates (X, Y, Z). Rows 32-54.

R=DPM

Table with columns: Center Number, Atomic Number, Atomic Type, Coordinates (X, Y, Z). Rows 1-67.









|    |   |   |           |          |           |
|----|---|---|-----------|----------|-----------|
| 64 | 1 | 0 | 2.705868  | 6.215854 | 0.329073  |
| 65 | 1 | 0 | 1.426776  | 7.432214 | 0.495830  |
| 66 | 1 | 0 | 1.605027  | 6.142668 | 1.702124  |
| 67 | 1 | 0 | -0.806967 | 6.832613 | 1.936394  |
| 68 | 1 | 0 | -2.037927 | 5.556181 | 1.932351  |
| 69 | 1 | 0 | -0.363004 | 5.162565 | 2.338720  |
| 70 | 1 | 0 | -2.705836 | 6.215874 | -0.329062 |
| 71 | 1 | 0 | -1.426735 | 7.432227 | -0.495809 |
| 72 | 1 | 0 | -1.604995 | 6.142692 | -1.702113 |

---









|    |   |   |           |           |           |
|----|---|---|-----------|-----------|-----------|
| 4  | 6 | 0 | -6.140261 | -2.944091 | -0.014301 |
| 5  | 6 | 0 | -6.151774 | -1.497171 | -0.014029 |
| 6  | 6 | 0 | -7.411558 | -0.824231 | -0.017649 |
| 7  | 6 | 0 | -4.916722 | -3.615960 | -0.011063 |
| 8  | 6 | 0 | -3.691825 | -2.925824 | -0.007630 |
| 9  | 6 | 0 | -3.704658 | -1.474754 | -0.007247 |
| 10 | 6 | 0 | -4.938205 | -0.805343 | -0.010432 |
| 11 | 6 | 0 | -2.450458 | -3.587230 | -0.004896 |
| 12 | 6 | 0 | -1.233505 | -2.892125 | -0.002084 |
| 13 | 6 | 0 | -1.251355 | -1.435739 | -0.001594 |
| 14 | 6 | 0 | -2.478082 | -0.776551 | -0.004179 |
| 15 | 6 | 0 | -0.000007 | -3.566897 | -0.000002 |
| 16 | 6 | 0 | 1.233493  | -2.892128 | 0.002078  |
| 17 | 6 | 0 | 1.251347  | -1.435742 | 0.001583  |
| 18 | 6 | 0 | -0.000003 | -0.727985 | -0.000008 |
| 19 | 6 | 0 | 2.450444  | -3.587236 | 0.004895  |
| 20 | 6 | 0 | 3.691812  | -2.925834 | 0.007630  |
| 21 | 6 | 0 | 3.704650  | -1.474763 | 0.007242  |
| 22 | 6 | 0 | 2.478075  | -0.776557 | 0.004169  |
| 23 | 6 | 0 | 4.916708  | -3.615973 | 0.011067  |
| 24 | 6 | 0 | 6.140249  | -2.944107 | 0.014307  |
| 25 | 6 | 0 | 6.151766  | -1.497187 | 0.014030  |
| 26 | 6 | 0 | 4.938198  | -0.805356 | 0.010428  |
| 27 | 6 | 0 | 7.390765  | -3.635639 | 0.018109  |
| 28 | 6 | 0 | 8.573933  | -2.950964 | 0.021498  |
| 29 | 6 | 0 | 8.584931  | -1.526062 | 0.021286  |
| 30 | 6 | 0 | 7.411551  | -0.824250 | 0.017653  |
| 31 | 6 | 0 | -0.000001 | 0.666354  | -0.000010 |
| 32 | 6 | 0 | 0.000002  | 1.883585  | -0.000010 |
| 33 | 6 | 0 | 0.000007  | 3.265514  | -0.000005 |
| 34 | 7 | 0 | -1.117005 | 4.050985  | -0.003473 |
| 35 | 6 | 0 | -0.756308 | 5.501624  | 0.208717  |
| 36 | 6 | 0 | 0.756335  | 5.501621  | -0.208711 |
| 37 | 7 | 0 | 1.117023  | 4.050977  | 0.003467  |
| 38 | 6 | 0 | 0.996013  | 5.783359  | -1.701845 |
| 39 | 6 | 0 | 1.674087  | 6.377867  | 0.640844  |
| 40 | 6 | 0 | -0.995985 | 5.783351  | 1.701852  |
| 41 | 6 | 0 | -1.674054 | 6.377883  | -0.640832 |
| 42 | 8 | 0 | -2.317004 | 3.647020  | 0.007876  |
| 43 | 8 | 0 | 2.317019  | 3.647004  | -0.007883 |
| 44 | 1 | 0 | -9.533574 | -1.001301 | -0.024072 |
| 45 | 1 | 0 | -9.514634 | -3.489954 | -0.024407 |
| 46 | 1 | 0 | -7.382618 | -4.720604 | -0.018310 |
| 47 | 1 | 0 | -7.418192 | 0.260641  | -0.017560 |
| 48 | 1 | 0 | -4.908769 | -4.701624 | -0.011382 |
| 49 | 1 | 0 | -4.944741 | 0.280037  | -0.010381 |
| 50 | 1 | 0 | -2.432523 | -4.672513 | -0.005315 |
| 51 | 1 | 0 | -2.499506 | 0.307836  | -0.004268 |
| 52 | 1 | 0 | -0.000008 | -4.652265 | -0.000001 |
| 53 | 1 | 0 | 2.432506  | -4.672519 | 0.005317  |
| 54 | 1 | 0 | 2.499502  | 0.307829  | 0.004254  |
| 55 | 1 | 0 | 4.908752  | -4.701637 | 0.011390  |
| 56 | 1 | 0 | 4.944737  | 0.280024  | 0.010374  |
| 57 | 1 | 0 | 7.382601  | -4.720623 | 0.018324  |
| 58 | 1 | 0 | 9.514620  | -3.489978 | 0.024423  |
| 59 | 1 | 0 | 9.533567  | -1.001326 | 0.024082  |
| 60 | 1 | 0 | 7.418188  | 0.260622  | 0.017560  |
| 61 | 1 | 0 | 0.807004  | 6.832624  | -1.936378 |
| 62 | 1 | 0 | 2.037952  | 5.556182  | -1.932347 |
| 63 | 1 | 0 | 0.363025  | 5.162583  | -2.338716 |
| 64 | 1 | 0 | 2.705868  | 6.215854  | 0.329073  |
| 65 | 1 | 0 | 1.426776  | 7.432214  | 0.495830  |
| 66 | 1 | 0 | 1.605027  | 6.142668  | 1.702124  |
| 67 | 1 | 0 | -0.806967 | 6.832613  | 1.936394  |
| 68 | 1 | 0 | -2.037927 | 5.556181  | 1.932351  |
| 69 | 1 | 0 | -0.363004 | 5.162565  | 2.338720  |
| 70 | 1 | 0 | -2.705836 | 6.215874  | -0.329062 |
| 71 | 1 | 0 | -1.426735 | 7.432227  | -0.495809 |
| 72 | 1 | 0 | -1.604995 | 6.142692  | -1.702113 |

---



|    |   |   |            |           |           |    |   |   |           |           |           |
|----|---|---|------------|-----------|-----------|----|---|---|-----------|-----------|-----------|
| 44 | 1 | 0 | 9.840389   | -3.021158 | 0.000004  | 4  | 6 | 0 | 8.551489  | -1.260622 | -0.000005 |
| 45 | 1 | 0 | 9.880761   | 1.959618  | 0.000016  | 5  | 6 | 0 | 8.570693  | 0.185850  | -0.000007 |
| 46 | 1 | 0 | 7.367627   | -3.000419 | -0.000002 | 6  | 6 | 0 | 9.834024  | 0.852468  | -0.000016 |
| 47 | 1 | 0 | 7.407967   | 1.978982  | 0.000010  | 7  | 6 | 0 | 7.323963  | -1.926210 | 0.000001  |
| 48 | 1 | 0 | 4.900721   | -2.982089 | -0.000007 | 8  | 6 | 0 | 6.102415  | -1.232575 | 0.000006  |
| 49 | 1 | 0 | 4.942935   | 2.002300  | 0.000005  | 9  | 6 | 0 | 6.122500  | 0.219981  | 0.000006  |
| 50 | 1 | 0 | 2.429696   | -2.950693 | -0.000012 | 10 | 6 | 0 | 7.360554  | 0.882554  | -0.000002 |
| 51 | 1 | 0 | 2.493642   | 2.027228  | 0.000001  | 11 | 6 | 0 | 4.858925  | -1.896398 | 0.000009  |
| 52 | 1 | 0 | 0.000000   | -2.932769 | -0.000017 | 12 | 6 | 0 | 3.647458  | -1.199998 | 0.000012  |
| 53 | 1 | 0 | -2.429695  | -2.950693 | -0.000018 | 13 | 6 | 0 | 3.668922  | 0.256204  | 0.000013  |
| 54 | 1 | 0 | -2.493642  | 2.027227  | 0.000004  | 14 | 6 | 0 | 4.897336  | 0.918183  | 0.000011  |
| 55 | 1 | 0 | -4.900720  | -2.982089 | -0.000017 | 15 | 6 | 0 | 2.396768  | -1.850929 | 0.000012  |
| 56 | 1 | 0 | -4.942934  | 2.002298  | 0.000011  | 16 | 6 | 0 | 1.185639  | -1.148450 | 0.000010  |
| 57 | 1 | 0 | -7.367626  | -3.000420 | -0.000012 | 17 | 6 | 0 | 1.210395  | 0.310465  | 0.000008  |
| 58 | 1 | 0 | -7.407965  | 1.978981  | 0.000019  | 18 | 6 | 0 | 2.442412  | 0.960258  | 0.000015  |
| 59 | 1 | 0 | -9.840388  | -3.021159 | -0.000005 | 19 | 6 | 0 | -0.051489 | -1.813572 | 0.000011  |
| 60 | 1 | 0 | -11.973798 | -1.792316 | 0.000010  | 20 | 6 | 0 | -1.280510 | -1.133197 | 0.000008  |
| 61 | 1 | 0 | -11.994259 | 0.696262  | 0.000027  | 21 | 6 | 0 | -1.287495 | 0.326006  | 0.000007  |
| 62 | 1 | 0 | -9.880760  | 1.959617  | 0.000028  | 22 | 6 | 0 | -0.034867 | 1.024477  | 0.000007  |

R=H

| Center Number | Atomic Number | Atomic Type | Coordinates (Angstroms) |           |           |
|---------------|---------------|-------------|-------------------------|-----------|-----------|
|               |               |             | X                       | Y         | Z         |
| 23            | 6             | 0           | -2.500128               | -1.820556 | 0.000007  |
| 24            | 6             | 0           | -3.743055               | -1.154918 | 0.000004  |
| 25            | 6             | 0           | -3.747761               | 0.301557  | 0.000005  |
| 26            | 6             | 0           | -2.511696               | 0.989160  | 0.000006  |
| 27            | 6             | 0           | -4.962588               | -1.837216 | 0.000000  |
| 28            | 6             | 0           | -6.198469               | -1.159694 | -0.000002 |
| 29            | 6             | 0           | -6.202269               | 0.292981  | 0.000002  |
| 30            | 6             | 0           | -4.968930               | 0.976657  | 0.000005  |
| 31            | 6             | 0           | -7.427828               | -1.839654 | -0.000008 |
| 32            | 6             | 0           | -8.647799               | -1.160640 | -0.000009 |
| 33            | 6             | 0           | -8.650915               | 0.286016  | -0.000004 |
| 34            | 6             | 0           | -7.433090               | 0.969018  | 0.000001  |
| 35            | 6             | 0           | -9.901802               | -1.845152 | -0.000015 |
| 36            | 6             | 0           | -11.081071              | -1.153731 | -0.000016 |
| 37            | 6             | 0           | -11.083964              | 0.271187  | -0.000010 |
| 38            | 6             | 0           | -9.906942               | 0.966436  | -0.000004 |
| 39            | 6             | 0           | -0.011704               | 2.429082  | 0.000004  |
| 40            | 6             | 0           | 0.065234                | 3.642948  | 0.000000  |
| 41            | 6             | 0           | 0.199952                | 5.068534  | -0.000005 |
| 42            | 8             | 0           | 1.269146                | 5.646831  | -0.000002 |
| 43            | 1             | 0           | 11.954783               | 0.663741  | -0.000030 |
| 44            | 1             | 0           | 11.922384               | -1.824435 | -0.000024 |
| 45            | 1             | 0           | 9.783821                | -3.043795 | -0.000008 |
| 46            | 1             | 0           | 9.847148                | 1.937281  | -0.000018 |
| 47            | 1             | 0           | 7.311528                | -3.011786 | 0.000003  |
| 48            | 1             | 0           | 7.374739                | 1.968002  | -0.000001 |
| 49            | 1             | 0           | 4.844391                | -2.981805 | 0.000012  |
| 50            | 1             | 0           | 4.910998                | 2.003368  | 0.000015  |
| 51            | 1             | 0           | 2.370968                | -2.935985 | 0.000019  |
| 52            | 1             | 0           | 2.468438                | 2.043662  | 0.000013  |
| 53            | 1             | 0           | -0.058356               | -2.898955 | 0.000015  |
| 54            | 1             | 0           | -2.487625               | -2.905821 | 0.000010  |
| 55            | 1             | 0           | -2.523171               | 2.072860  | 0.000006  |
| 56            | 1             | 0           | -4.960220               | -2.922695 | -0.000001 |
| 57            | 1             | 0           | -4.971675               | 2.062090  | 0.000007  |
| 58            | 1             | 0           | -7.427333               | -2.925285 | -0.000011 |
| 59            | 1             | 0           | -7.435789               | 2.054648  | 0.000005  |
| 60            | 1             | 0           | -9.899791               | -2.930082 | -0.000019 |
| 61            | 1             | 0           | -12.024789              | -1.687235 | -0.000021 |
| 62            | 1             | 0           | -12.029619              | 0.801152  | -0.000011 |
| 63            | 1             | 0           | -9.908327               | 2.051367  | 0.000000  |
| 64            | 1             | 0           | -0.755851               | 5.627173  | -0.000013 |

R=SiMe3

| Center Number | Atomic Number | Atomic Type | Coordinates (Angstroms) |           |           |
|---------------|---------------|-------------|-------------------------|-----------|-----------|
|               |               |             | X                       | Y         | Z         |
| 1             | 6             | 0           | -11.049640              | -0.328353 | -0.000005 |
| 2             | 6             | 0           | -11.038193              | -1.753035 | -0.000004 |
| 3             | 6             | 0           | -9.854246               | -2.436795 | -0.000002 |
| 4             | 6             | 0           | -8.604542               | -1.744708 | -0.000001 |
| 5             | 6             | 0           | -8.616276               | -0.298318 | -0.000002 |
| 6             | 6             | 0           | -9.876537               | 0.373951  | -0.000004 |
| 7             | 6             | 0           | -7.379916               | -2.415854 | 0.000001  |
| 8             | 6             | 0           | -6.154968               | -1.728366 | 0.000001  |
| 9             | 6             | 0           | -6.167121               | -0.275768 | 0.000000  |
| 10            | 6             | 0           | -7.402171               | 0.392092  | -0.000001 |
| 11            | 6             | 0           | -4.914487               | -2.398171 | 0.000003  |
| 12            | 6             | 0           | -3.699252               | -1.708625 | 0.000003  |
| 13            | 6             | 0           | -3.711535               | -0.252054 | 0.000002  |
| 14            | 6             | 0           | -4.937200               | 0.415030  | 0.000001  |
| 15            | 6             | 0           | -2.452426               | -2.367349 | 0.000003  |
| 16            | 6             | 0           | -1.236034               | -1.674227 | 0.000003  |
| 17            | 6             | 0           | -1.249181               | -0.214378 | 0.000002  |
| 18            | 6             | 0           | -2.479128               | 0.441924  | 0.000002  |
| 19            | 6             | 0           | -0.005051               | -2.350194 | 0.000003  |
| 20            | 6             | 0           | 1.226776                | -1.675779 | 0.000001  |
| 21            | 6             | 0           | 1.241592                | -0.215998 | 0.000000  |
| 22            | 6             | 0           | -0.003390               | 0.491717  | 0.000001  |
| 23            | 6             | 0           | 2.442381                | -2.370297 | 0.000002  |
| 24            | 6             | 0           | 3.689949                | -1.712944 | 0.000001  |
| 25            | 6             | 0           | 3.703841                | -0.256392 | 0.000000  |
| 26            | 6             | 0           | 2.472233                | 0.439039  | -0.000001 |
| 27            | 6             | 0           | 4.904448                | -2.403796 | 0.000001  |
| 28            | 6             | 0           | 6.145633                | -1.735281 | 0.000000  |
| 29            | 6             | 0           | 6.159328                | -0.282692 | -0.000001 |

R=CHO

| Center Number | Atomic Number | Atomic Type | Coordinates (Angstroms) |           |           |
|---------------|---------------|-------------|-------------------------|-----------|-----------|
|               |               |             | X                       | Y         | Z         |
| 1             | 6             | 0           | 11.003348               | 0.144234  | -0.000022 |
| 2             | 6             | 0           | 10.984625               | -1.280487 | -0.000020 |
| 3             | 6             | 0           | 9.797753                | -1.958941 | -0.000011 |







|    |    |   |            |           |           |
|----|----|---|------------|-----------|-----------|
| 33 | 6  | 0 | 8.669785   | -0.319522 | -0.000001 |
| 34 | 6  | 0 | 7.450732   | 0.362018  | -0.000001 |
| 35 | 6  | 0 | 9.923357   | -2.449001 | 0.000001  |
| 36 | 6  | 0 | 11.102250  | -1.756704 | 0.000001  |
| 37 | 6  | 0 | 11.103317  | -0.331915 | -0.000001 |
| 38 | 6  | 0 | 9.925198   | 0.361845  | -0.000001 |
| 39 | 6  | 0 | 0.034986   | 1.816555  | 0.000005  |
| 40 | 6  | 0 | 0.026802   | 3.033441  | 0.000007  |
| 41 | 6  | 0 | 0.003540   | 4.432731  | 0.000010  |
| 42 | 6  | 0 | 1.065408   | 5.316984  | 0.000069  |
| 43 | 6  | 0 | 0.665588   | 6.676318  | 0.000052  |
| 44 | 6  | 0 | -0.693286  | 6.833626  | -0.000020 |
| 45 | 16 | 0 | -1.519816  | 5.314308  | -0.000069 |
| 46 | 1  | 0 | -11.945071 | -0.017889 | 0.000018  |
| 47 | 1  | 0 | -11.898404 | -2.506208 | -0.000002 |
| 48 | 1  | 0 | -9.752128  | -3.712413 | -0.000014 |
| 49 | 1  | 0 | -9.845007  | 1.267625  | 0.000025  |
| 50 | 1  | 0 | -7.279642  | -3.665497 | -0.000016 |
| 51 | 1  | 0 | -7.372512  | 1.313116  | 0.000022  |
| 52 | 1  | 0 | -4.812786  | -3.620906 | -0.000017 |
| 53 | 1  | 0 | -4.907853  | 1.362650  | 0.000018  |
| 54 | 1  | 0 | -2.341181  | -3.561840 | -0.000015 |
| 55 | 1  | 0 | -2.459865  | 1.413419  | 0.000014  |
| 56 | 1  | 0 | 0.084280   | -3.519230 | -0.000009 |
| 57 | 1  | 0 | 2.510156   | -3.517499 | -0.000003 |
| 58 | 1  | 0 | 2.536781   | 1.459099  | -0.000001 |
| 59 | 1  | 0 | 4.982142   | -3.531551 | 0.000001  |
| 60 | 1  | 0 | 4.987268   | 1.452594  | -0.000002 |
| 61 | 1  | 0 | 7.449362   | -3.531640 | 0.000002  |
| 62 | 1  | 0 | 7.452603   | 1.447749  | -0.000002 |
| 63 | 1  | 0 | 9.922292   | -3.534011 | 0.000002  |
| 64 | 1  | 0 | 12.046506  | -2.289345 | 0.000001  |
| 65 | 1  | 0 | 12.048299  | 0.199409  | -0.000001 |
| 66 | 1  | 0 | 9.925486   | 1.446869  | -0.000002 |
| 67 | 1  | 0 | 2.093924   | 4.983571  | 0.000124  |
| 68 | 1  | 0 | 1.358256   | 7.507300  | 0.000092  |
| 69 | 1  | 0 | -1.260488  | 7.751683  | -0.000047 |

---



|    |   |   |            |           |           |    |   |   |            |           |           |
|----|---|---|------------|-----------|-----------|----|---|---|------------|-----------|-----------|
| 44 | 6 | 0 | 1.513524   | 5.616184  | -0.495313 | 50 | 6 | 0 | 3.453987   | 5.206465  | 0.000002  |
| 45 | 6 | 0 | 2.734110   | 6.270460  | -0.368338 | 51 | 6 | 0 | 3.020134   | 6.535730  | 0.000001  |
| 46 | 6 | 0 | 3.745943   | 5.728779  | 0.422633  | 52 | 6 | 0 | 1.657875   | 6.842345  | -0.000001 |
| 47 | 6 | 0 | 3.526593   | 4.521257  | 1.085051  | 53 | 6 | 0 | 0.733180   | 5.803806  | 0.000002  |
| 48 | 6 | 0 | 2.309824   | 3.862146  | 0.956484  | 54 | 1 | 0 | -12.004857 | -0.778848 | -0.000013 |
| 49 | 6 | 0 | -1.513501  | 5.616213  | 0.495256  | 55 | 1 | 0 | -11.970519 | -3.267244 | 0.000002  |
| 50 | 6 | 0 | -2.734084  | 6.270495  | 0.368283  | 56 | 1 | 0 | -9.831182  | -4.484675 | 0.000007  |
| 51 | 6 | 0 | -3.745937  | 5.728796  | -0.422649 | 57 | 1 | 0 | -9.898951  | 0.496502  | -0.000024 |
| 52 | 6 | 0 | -3.526611  | 4.521249  | -1.085030 | 58 | 1 | 0 | -7.358527  | -4.449581 | 0.000008  |
| 53 | 6 | 0 | -2.309845  | 3.862133  | -0.956466 | 59 | 1 | 0 | -7.426612  | 0.529170  | -0.000028 |
| 54 | 1 | 0 | 12.006365  | -0.688384 | -0.138976 | 60 | 1 | 0 | -4.889819  | -4.415842 | 0.000015  |
| 55 | 1 | 0 | 11.971946  | -3.176046 | -0.068583 | 61 | 1 | 0 | -4.962317  | 0.566938  | -0.000028 |
| 56 | 1 | 0 | 9.832307   | -4.391821 | -0.011730 | 62 | 1 | 0 | -2.411622  | -4.360767 | 0.000023  |
| 57 | 1 | 0 | 9.900590   | 0.587071  | -0.152151 | 63 | 1 | 0 | -2.514262  | 0.608200  | -0.000021 |
| 58 | 1 | 0 | 7.359493   | -4.355569 | 0.012058  | 64 | 1 | 0 | 0.000002   | -4.326949 | 0.000031  |
| 59 | 1 | 0 | 7.427968   | 0.621013  | -0.126030 | 65 | 1 | 0 | 2.411626   | -4.360768 | 0.000031  |
| 60 | 1 | 0 | 4.890863   | -4.320851 | 0.030551  | 66 | 1 | 0 | 2.514262   | 0.608199  | 0.000004  |
| 61 | 1 | 0 | 4.961979   | 0.660579  | -0.097962 | 67 | 1 | 0 | 4.889824   | -4.415842 | 0.000024  |
| 62 | 1 | 0 | 2.413015   | -4.265982 | 0.027818  | 68 | 1 | 0 | 4.962318   | 0.566939  | -0.000010 |
| 63 | 1 | 0 | 2.516050   | 0.703420  | -0.078225 | 69 | 1 | 0 | 7.358532   | -4.449579 | 0.000014  |
| 64 | 1 | 0 | -0.000001  | -4.231319 | -0.000061 | 70 | 1 | 0 | 7.426613   | 0.529172  | -0.000021 |
| 65 | 1 | 0 | -2.413018  | -4.265980 | -0.027927 | 71 | 1 | 0 | 9.831188   | -4.484671 | 0.000002  |
| 66 | 1 | 0 | -2.516049  | 0.703418  | 0.078282  | 72 | 1 | 0 | 11.970525  | -3.267238 | -0.000015 |
| 67 | 1 | 0 | -4.890866  | -4.320848 | -0.030643 | 73 | 1 | 0 | 12.004860  | -0.778842 | -0.000030 |
| 68 | 1 | 0 | -4.961978  | 0.660577  | 0.098048  | 74 | 1 | 0 | 9.898952   | 0.496506  | -0.000031 |
| 69 | 1 | 0 | -7.359496  | -4.355565 | -0.012127 | 75 | 1 | 0 | -1.332615  | 7.876952  | -0.000001 |
| 70 | 1 | 0 | -7.427967  | 0.621011  | 0.126142  | 76 | 1 | 0 | -3.750364  | 7.337075  | 0.000005  |
| 71 | 1 | 0 | -9.832309  | -4.391817 | 0.011686  | 77 | 1 | 0 | -4.516315  | 4.990129  | 0.000014  |
| 72 | 1 | 0 | -11.971947 | -3.176044 | 0.068606  | 78 | 1 | 0 | -2.873535  | 3.128849  | 0.000017  |
| 73 | 1 | 0 | -12.006364 | -0.688384 | 0.139089  | 79 | 1 | 0 | 2.873535   | 3.128860  | 0.000001  |
| 74 | 1 | 0 | -9.900588  | 0.587069  | 0.152289  | 80 | 1 | 0 | 4.516308   | 4.990144  | 0.000001  |
| 75 | 1 | 0 | 0.741399   | 6.039014  | -1.126158 | 81 | 1 | 0 | 3.750350   | 7.337088  | 0.000001  |
| 76 | 1 | 0 | 2.897718   | 7.204295  | -0.894652 | 82 | 1 | 0 | 1.332597   | 7.876957  | -0.000002 |
| 77 | 1 | 0 | 4.694383   | 6.243734  | 0.524633  |    |   |   |            |           |           |
| 78 | 1 | 0 | 4.302160   | 4.097357  | 1.713365  |    |   |   |            |           |           |
| 79 | 1 | 0 | 2.137054   | 2.933890  | 1.488280  |    |   |   |            |           |           |
| 80 | 1 | 0 | -0.741360  | 6.039058  | 1.126072  |    |   |   |            |           |           |
| 81 | 1 | 0 | -2.897674  | 7.204349  | 0.894568  |    |   |   |            |           |           |
| 82 | 1 | 0 | -4.694375  | 6.243755  | -0.524647 |    |   |   |            |           |           |
| 83 | 1 | 0 | -4.302193  | 4.097334  | -1.713315 |    |   |   |            |           |           |
| 84 | 1 | 0 | -2.137093  | 2.933857  | -1.488234 |    |   |   |            |           |           |

R=PhO

| Center Number | Atomic Number | Atomic Type | Coordinates (Angstroms) |           |           |
|---------------|---------------|-------------|-------------------------|-----------|-----------|
|               |               |             | X                       | Y         | Z         |
| 1             | 6             | 0           | -11.046295              | -0.617675 | -0.000047 |
| 2             | 6             | 0           | -11.032116              | -2.043065 | 0.000007  |
| 3             | 6             | 0           | -9.848391               | -2.725553 | 0.000037  |
| 4             | 6             | 0           | -8.599139               | -2.031082 | 0.000016  |
| 5             | 6             | 0           | -8.613927               | -0.584335 | -0.000038 |
| 6             | 6             | 0           | -9.875351               | 0.086711  | -0.000068 |
| 7             | 6             | 0           | -7.374887               | -2.700613 | 0.000045  |
| 8             | 6             | 0           | -6.150875               | -2.010583 | 0.000024  |
| 9             | 6             | 0           | -6.167274               | -0.558925 | -0.000028 |
| 10            | 6             | 0           | -7.401934               | 0.107997  | -0.000058 |
| 11            | 6             | 0           | -4.909096               | -2.678266 | 0.000051  |
| 12            | 6             | 0           | -3.697678               | -1.984626 | 0.000031  |
| 13            | 6             | 0           | -3.717315               | -0.530676 | -0.000017 |
| 14            | 6             | 0           | -4.937593               | 0.135033  | -0.000046 |
| 15            | 6             | 0           | -2.444599               | -2.635235 | 0.000049  |
| 16            | 6             | 0           | -1.234636               | -1.934971 | 0.000029  |
| 17            | 6             | 0           | -1.260224               | -0.476500 | 0.000000  |
| 18            | 6             | 0           | -2.479930               | 0.168124  | -0.000028 |
| 19            | 6             | 0           | 0.000000                | -2.607593 | 0.000028  |
| 20            | 6             | 0           | 1.234636                | -1.934971 | 0.000010  |
| 21            | 6             | 0           | 1.260224                | -0.476500 | 0.000006  |
| 22            | 6             | 0           | 0.000000                | 0.255729  | 0.000000  |
| 23            | 6             | 0           | 2.444598                | -2.635236 | 0.000001  |
| 24            | 6             | 0           | 3.697677                | -1.984626 | -0.000003 |
| 25            | 6             | 0           | 3.717314                | -0.530676 | 0.000007  |
| 26            | 6             | 0           | 2.479930                | 0.168124  | 0.000011  |
| 27            | 6             | 0           | 4.909095                | -2.678266 | -0.000014 |
| 28            | 6             | 0           | 6.150875                | -2.010583 | -0.000011 |
| 29            | 6             | 0           | 6.167274                | -0.558925 | 0.000004  |
| 30            | 6             | 0           | 4.937592                | 0.135032  | 0.000012  |
| 31            | 6             | 0           | 7.374886                | -2.700613 | -0.000022 |
| 32            | 6             | 0           | 8.599139                | -2.031083 | -0.000018 |
| 33            | 6             | 0           | 8.613927                | -0.584336 | -0.000002 |
| 34            | 6             | 0           | 7.401933                | 0.107997  | 0.000009  |
| 35            | 6             | 0           | 9.848391                | -2.725553 | -0.000030 |
| 36            | 6             | 0           | 11.032115               | -2.043066 | -0.000025 |
| 37            | 6             | 0           | 11.046295               | -0.617676 | -0.000008 |
| 38            | 6             | 0           | 9.875351                | 0.086711  | 0.000003  |
| 39            | 6             | 0           | 0.000000                | 1.624551  | -0.000003 |
| 40            | 6             | 0           | 0.000000                | 2.859707  | 0.000000  |
| 33            | 6             | 0           | 8.620128                | -1.253656 | -0.000014 |
| 34            | 6             | 0           | 7.410707                | -0.556403 | -0.000013 |
| 35            | 6             | 0           | 9.846339                | -3.399821 | -0.000004 |
| 36            | 6             | 0           | 11.033049               | -2.722772 | -0.000014 |
| 37            | 6             | 0           | 11.052844               | -1.297368 | -0.000023 |
| 38            | 6             | 0           | 9.884646                | -0.588371 | -0.000023 |
| 39            | 6             | 0           | 0.000001                | 0.985555  | 0.000000  |
| 40            | 6             | 0           | 0.000002                | 2.228380  | 0.000003  |
| 41            | 6             | 0           | -0.000001               | 3.577514  | 0.000006  |
| 42            | 6             | 0           | 1.173774                | 4.455886  | 0.000006  |
| 43            | 6             | 0           | -1.173779               | 4.455882  | 0.000006  |
| 44            | 6             | 0           | -0.733189               | 5.803803  | 0.000002  |
| 45            | 6             | 0           | -1.657888               | 6.842339  | 0.000002  |
| 46            | 6             | 0           | -3.020146               | 6.535719  | 0.000005  |
| 47            | 6             | 0           | -3.453995               | 5.206453  | 0.000011  |
| 48            | 6             | 0           | -2.534803               | 4.158594  | 0.000013  |
| 49            | 6             | 0           | 2.534799                | 4.158603  | 0.000004  |

|    |   |   |           |           |           |    |   |   |           |           |           |
|----|---|---|-----------|-----------|-----------|----|---|---|-----------|-----------|-----------|
| 58 | 1 | 0 | 0.000000  | -3.692689 | 0.000041  | 3  | 6 | 0 | -0.000001 | 4.938735  | -0.000003 |
| 59 | 1 | 0 | 2.419189  | -3.720224 | 0.000000  | 4  | 6 | 0 | 1.220695  | 5.618420  | -0.000167 |
| 60 | 1 | 0 | 2.504953  | 1.251705  | 0.000015  | 5  | 6 | 0 | 11.047480 | 0.043532  | 0.000016  |
| 61 | 1 | 0 | 4.897550  | -3.763624 | -0.000023 | 6  | 6 | 0 | 11.033539 | -1.381166 | 0.000008  |
| 62 | 1 | 0 | 4.949351  | 1.220418  | 0.000021  | 7  | 6 | 0 | 9.848460  | -2.062819 | 0.000001  |
| 63 | 1 | 0 | 7.365858  | -3.786143 | -0.000035 | 8  | 6 | 0 | 8.599910  | -1.368480 | 0.000002  |
| 64 | 1 | 0 | 7.412909  | 1.193537  | 0.000020  | 9  | 6 | 0 | 8.614205  | 0.077854  | 0.000011  |
| 65 | 1 | 0 | 9.838064  | -3.810376 | -0.000042 | 10 | 6 | 0 | 9.875653  | 0.747899  | 0.000018  |
| 66 | 1 | 0 | 11.971841 | -2.583537 | -0.000033 | 11 | 6 | 0 | 7.374180  | -2.037402 | -0.000004 |
| 67 | 1 | 0 | 11.996197 | -0.095470 | -0.000004 | 12 | 6 | 0 | 6.150468  | -1.347621 | -0.000003 |
| 68 | 1 | 0 | 9.885053  | 1.171539  | 0.000016  | 13 | 6 | 0 | 6.165288  | 0.104765  | 0.000005  |
| 69 | 1 | 0 | -2.165680 | 4.412244  | 0.000014  | 14 | 6 | 0 | 7.401281  | 0.770398  | 0.000012  |
| 70 | 1 | 0 | -2.167460 | 6.891856  | 0.000023  | 15 | 6 | 0 | 4.908678  | -2.015127 | -0.000009 |
| 71 | 1 | 0 | 2.167462  | 6.891854  | 0.000008  | 16 | 6 | 0 | 3.695065  | -1.323074 | -0.000007 |
| 72 | 1 | 0 | 2.165681  | 4.412243  | -0.000002 | 17 | 6 | 0 | 3.710206  | 0.132978  | 0.000000  |

R=NO

| Center Number | Atomic Number | Atomic Type | Coordinates (Angstroms) |           |           |
|---------------|---------------|-------------|-------------------------|-----------|-----------|
|               |               |             | X                       | Y         | Z         |
| 1             | 6             | 0           | -11.034804              | -0.014311 | 0.000008  |
| 2             | 6             | 0           | -11.016338              | -1.439337 | 0.000009  |
| 3             | 6             | 0           | -9.829723               | -2.117425 | 0.000007  |
| 4             | 6             | 0           | -8.582865               | -1.419013 | 0.000004  |
| 5             | 6             | 0           | -8.601905               | 0.027359  | 0.000003  |
| 6             | 6             | 0           | -9.865556               | 0.693690  | 0.000005  |
| 7             | 6             | 0           | -7.355716               | -2.083988 | 0.000002  |
| 8             | 6             | 0           | -6.134209               | -1.389596 | -0.000001 |
| 9             | 6             | 0           | -6.154432               | 0.062045  | -0.000002 |
| 10            | 6             | 0           | -7.391589               | 0.723994  | 0.000000  |
| 11            | 6             | 0           | -4.889952               | -2.052848 | -0.000002 |
| 12            | 6             | 0           | -3.680531               | -1.354873 | -0.000004 |
| 13            | 6             | 0           | -3.703235               | 0.099357  | -0.000005 |
| 14            | 6             | 0           | -4.926702               | 0.760615  | -0.000004 |
| 15            | 6             | 0           | -2.426535               | -2.003382 | -0.000004 |
| 16            | 6             | 0           | -1.217500               | -1.300453 | -0.000005 |
| 17            | 6             | 0           | -1.245730               | 0.157464  | -0.000006 |
| 18            | 6             | 0           | -2.468575               | 0.802545  | -0.000006 |
| 19            | 6             | 0           | 0.018915                | -1.970522 | -0.000004 |
| 20            | 6             | 0           | 1.252589                | -1.295252 | -0.000005 |
| 21            | 6             | 0           | 1.274421                | 0.163174  | -0.000006 |
| 22            | 6             | 0           | 0.013913                | 0.882977  | -0.000007 |
| 23            | 6             | 0           | 2.464912                | -1.992339 | -0.000004 |
| 24            | 6             | 0           | 3.716514                | -1.339305 | -0.000004 |
| 25            | 6             | 0           | 3.734414                | 0.115208  | -0.000005 |
| 26            | 6             | 0           | 2.495392                | 0.810774  | -0.000007 |
| 27            | 6             | 0           | 4.928644                | -2.032648 | -0.000002 |
| 28            | 6             | 0           | 6.170879                | -1.365824 | -0.000001 |
| 29            | 6             | 0           | 6.186865                | 0.085849  | -0.000002 |
| 30            | 6             | 0           | 4.956284                | 0.779385  | -0.000004 |
| 31            | 6             | 0           | 7.394549                | -2.056485 | 0.000002  |
| 32            | 6             | 0           | 8.619814                | -1.388159 | 0.000004  |
| 33            | 6             | 0           | 8.634762                | 0.058262  | 0.000003  |
| 34            | 6             | 0           | 7.422269                | 0.751085  | 0.000000  |
| 35            | 6             | 0           | 9.868618                | -2.083127 | 0.000007  |
| 36            | 6             | 0           | 11.053393               | -1.401889 | 0.000009  |
| 37            | 6             | 0           | 11.067842               | 0.023184  | 0.000008  |
| 38            | 6             | 0           | 9.896643                | 0.727943  | 0.000005  |
| 39            | 6             | 0           | -0.007347               | 2.258096  | -0.000005 |
| 40            | 6             | 0           | -0.086751               | 3.483630  | -0.000002 |
| 41            | 7             | 0           | -0.241095               | 4.788992  | 0.000003  |
| 42            | 8             | 0           | -1.395585               | 5.344792  | 0.000005  |
| 43            | 6             | 0           | 0.930525                | 5.684305  | 0.000003  |
| 44            | 1             | 0           | -11.986243              | 0.505320  | 0.000010  |
| 45            | 1             | 0           | -11.954203              | -1.983188 | 0.000011  |
| 46            | 1             | 0           | -9.815536               | -3.202334 | 0.000007  |
| 47            | 1             | 0           | -9.878707               | 1.778569  | 0.000005  |
| 48            | 1             | 0           | -7.342659               | -3.169618 | 0.000003  |
| 49            | 1             | 0           | -7.406121               | 1.809514  | -0.000001 |
| 50            | 1             | 0           | -4.874452               | -3.138309 | -0.000001 |
| 51            | 1             | 0           | -4.941045               | 1.845901  | -0.000005 |
| 52            | 1             | 0           | -2.398975               | -3.088480 | -0.000003 |
| 53            | 1             | 0           | -2.500245               | 1.886393  | -0.000007 |
| 54            | 1             | 0           | 0.021474                | -3.055746 | -0.000003 |
| 55            | 1             | 0           | 2.442183                | -3.077503 | -0.000003 |
| 56            | 1             | 0           | 2.519747                | 1.894770  | -0.000008 |
| 57            | 1             | 0           | 4.916627                | -3.118110 | -0.000001 |
| 58            | 1             | 0           | 4.969141                | 1.864981  | -0.000005 |
| 59            | 1             | 0           | 7.384531                | -3.142115 | 0.000003  |
| 60            | 1             | 0           | 7.434487                | 1.836782  | -0.000001 |
| 61            | 1             | 0           | 9.857354                | -3.168046 | 0.000008  |
| 62            | 1             | 0           | 11.992733               | -1.943124 | 0.000012  |
| 63            | 1             | 0           | 12.017852               | 0.545423  | 0.000010  |
| 64            | 1             | 0           | 9.907163                | 1.812909  | 0.000004  |
| 65            | 1             | 0           | 1.849110                | 5.099527  | 0.000012  |
| 66            | 1             | 0           | 0.872585                | 6.312098  | -0.889873 |
| 67            | 1             | 0           | 0.872574                | 6.312109  | 0.889870  |

R=IN

| Center Number | Atomic Number | Atomic Type | Coordinates (Angstroms) |           |           |
|---------------|---------------|-------------|-------------------------|-----------|-----------|
|               |               |             | X                       | Y         | Z         |
| 1             | 6             | 0           | -11.276279              | -0.623363 | 0.000495  |
| 2             | 6             | 0           | -11.324186              | -2.047369 | 0.008030  |
| 3             | 6             | 0           | -10.169990              | -2.780053 | 0.011838  |
| 4             | 6             | 0           | -8.892367               | -2.140734 | 0.008367  |
| 5             | 6             | 0           | -8.843903               | -0.695058 | 0.000697  |
| 6             | 6             | 0           | -10.075003              | 0.029355  | -0.003042 |
| 7             | 6             | 0           | -7.697023               | -2.862482 | 0.012106  |
| 8             | 6             | 0           | -6.444380               | -2.226613 | 0.008596  |
| 9             | 6             | 0           | -6.396365               | -0.774873 | 0.000847  |
| 10            | 6             | 0           | -7.602274               | -0.055815 | -0.002820 |
| 11            | 6             | 0           | -5.232927               | -2.947547 | 0.012283  |
| 12            | 6             | 0           | -3.990142               | -2.309038 | 0.008625  |
| 13            | 6             | 0           | -3.943113               | -0.853289 | 0.000819  |
| 14            | 6             | 0           | -5.139013               | -0.135300 | -0.002779 |
| 15            | 6             | 0           | -2.771403               | -3.019215 | 0.012054  |
| 16            | 6             | 0           | -1.527889               | -2.376524 | 0.008045  |
| 17            | 6             | 0           | -1.484192               | -0.917997 | 0.000312  |
| 18            | 6             | 0           | -2.682797               | -0.209911 | -0.002899 |
| 19            | 6             | 0           | -0.323141               | -3.100117 | 0.010932  |
| 20            | 6             | 0           | 0.936731                | -2.477741 | 0.006159  |
| 21            | 6             | 0           | 1.012248                | -1.020714 | -0.001140 |
| 22            | 6             | 0           | -0.207934               | -0.265457 | -0.003152 |
| 23            | 6             | 0           | 2.123502                | -3.220381 | 0.007821  |
| 24            | 6             | 0           | 3.395864                | -2.611293 | 0.001931  |

R=Allyl

| Center Number | Atomic Number | Atomic Type | Coordinates (Angstroms) |          |           |
|---------------|---------------|-------------|-------------------------|----------|-----------|
|               |               |             | X                       | Y        | Z         |
| 1             | 6             | 0           | 0.000000                | 3.510900 | -0.000002 |
| 2             | 6             | 0           | 0.000000                | 2.296064 | -0.000002 |



|    |   |   |            |           |           |    |   |   |            |           |           |
|----|---|---|------------|-----------|-----------|----|---|---|------------|-----------|-----------|
| 40 | 6 | 0 | -0.000001  | 1.292705  | 0.033411  | 40 | 6 | 0 | 0.000000   | 2.213140  | 0.000001  |
| 41 | 6 | 0 | 0.000003   | 2.713118  | 0.042475  | 41 | 6 | 0 | -0.000001  | 3.607204  | 0.000001  |
| 42 | 7 | 0 | 1.196215   | 3.307677  | 0.053666  | 42 | 7 | 0 | -1.115156  | 4.382430  | 0.003862  |
| 43 | 7 | 0 | 1.173323   | 4.671205  | 0.064797  | 43 | 6 | 0 | -0.757825  | 5.836629  | 0.204164  |
| 44 | 6 | 0 | 0.000013   | 5.443098  | 0.029813  | 44 | 6 | 0 | 0.757825   | 5.836627  | -0.204171 |
| 45 | 7 | 0 | -1.173303  | 4.671214  | 0.064813  | 45 | 7 | 0 | 1.115153   | 4.382430  | -0.003863 |
| 46 | 7 | 0 | -1.196203  | 3.307686  | 0.053685  | 46 | 6 | 0 | 1.009910   | 6.130220  | -1.692877 |
| 47 | 8 | 0 | 0.000018   | 6.650861  | -0.023655 | 47 | 6 | 0 | 1.673651   | 6.701884  | 0.658892  |
| 48 | 6 | 0 | -2.467373  | 5.292858  | -0.018708 | 48 | 6 | 0 | -1.009911  | 6.130228  | 1.692870  |
| 49 | 6 | 0 | -2.753599  | 6.476509  | 0.665383  | 49 | 6 | 0 | -1.673656  | 6.701884  | -0.658900 |
| 50 | 6 | 0 | -4.031056  | 7.021504  | 0.579712  | 50 | 8 | 0 | 2.315060   | 3.976859  | -0.020383 |
| 51 | 6 | 0 | -5.021545  | 6.398577  | -0.175696 | 51 | 8 | 0 | -2.315062  | 3.976859  | 0.020386  |
| 52 | 6 | 0 | -4.728564  | 5.215058  | -0.849899 | 52 | 1 | 0 | -11.988901 | -0.660784 | -0.016047 |
| 53 | 6 | 0 | -3.456493  | 4.659373  | -0.774811 | 53 | 1 | 0 | -11.976709 | -3.149226 | -0.016970 |
| 54 | 6 | 0 | 2.467397   | 5.292842  | -0.018740 | 54 | 1 | 0 | -9.847518  | -4.385223 | -0.013583 |
| 55 | 6 | 0 | 2.753642   | 6.476481  | 0.665363  | 55 | 1 | 0 | -9.870430  | 0.595048  | -0.011710 |
| 56 | 6 | 0 | 4.031100   | 7.021470  | 0.579677  | 56 | 1 | 0 | -7.374094  | -4.372852 | -0.009276 |
| 57 | 6 | 0 | 5.021571   | 6.398547  | -0.175758 | 57 | 1 | 0 | -7.396509  | 0.605271  | -0.007300 |
| 58 | 6 | 0 | 4.728571   | 5.215039  | -0.849974 | 58 | 1 | 0 | -4.905856  | -4.363023 | -0.005456 |
| 59 | 6 | 0 | 3.456498   | 4.659362  | -0.774869 | 59 | 1 | 0 | -4.929828  | 0.620522  | -0.003273 |
| 60 | 1 | 0 | -11.993672 | -1.623966 | 0.118314  | 60 | 1 | 0 | -2.434322  | -4.340920 | -0.002445 |
| 61 | 1 | 0 | -11.974179 | -4.111292 | 0.039494  | 61 | 1 | 0 | -2.488779  | 0.641650  | -0.000186 |
| 62 | 1 | 0 | -9.841502  | -5.339786 | -0.020012 | 62 | 1 | 0 | 0.000001   | -4.326200 | -0.000010 |
| 63 | 1 | 0 | -9.879704  | -0.361435 | 0.137267  | 63 | 1 | 0 | 2.434324   | -4.340919 | 0.002425  |
| 64 | 1 | 0 | -7.368880  | -5.319387 | -0.042036 | 64 | 1 | 0 | 2.488780   | 0.641651  | 0.000192  |
| 65 | 1 | 0 | -7.406836  | -0.342384 | 0.112989  | 65 | 1 | 0 | 4.905858   | -4.363022 | 0.005439  |
| 66 | 1 | 0 | -4.901845  | -5.301430 | -0.060633 | 66 | 1 | 0 | 4.929828   | 0.620522  | 0.003283  |
| 67 | 1 | 0 | -4.941535  | -0.319018 | 0.087887  | 67 | 1 | 0 | 7.374095   | -4.372851 | 0.009264  |
| 68 | 1 | 0 | -2.429805  | -5.269700 | -0.072496 | 68 | 1 | 0 | 7.396510   | 0.605272  | 0.007318  |
| 69 | 1 | 0 | -2.494433  | -0.292547 | 0.061563  | 69 | 1 | 0 | 9.847520   | -4.385222 | -0.013577 |
| 70 | 1 | 0 | -0.000008  | -5.249883 | -0.078586 | 70 | 1 | 0 | 11.976710  | -3.149224 | 0.016980  |
| 71 | 1 | 0 | 2.429790   | -5.269704 | -0.072492 | 71 | 1 | 0 | 11.988901  | -0.660782 | 0.016073  |
| 72 | 1 | 0 | 2.494426   | -0.292551 | 0.061565  | 72 | 1 | 0 | 9.870430   | 0.595049  | 0.011737  |
| 73 | 1 | 0 | 4.901829   | -5.301438 | -0.060625 | 73 | 1 | 0 | 0.823467   | 7.181560  | -1.920020 |
| 74 | 1 | 0 | 4.941527   | -0.319026 | 0.087892  | 74 | 1 | 0 | 2.053491   | 5.903823  | -1.916262 |
| 75 | 1 | 0 | 7.368864   | -5.319399 | -0.042024 | 75 | 1 | 0 | 0.381924   | 5.515129  | -2.340008 |
| 76 | 1 | 0 | 7.406828   | -0.342396 | 0.112997  | 76 | 1 | 0 | 2.706692   | 6.535775  | 0.353594  |
| 77 | 1 | 0 | 9.841486   | -5.339802 | -0.019995 | 77 | 1 | 0 | 1.433288   | 7.758570  | 0.519475  |
| 78 | 1 | 0 | 11.974165  | -4.111312 | 0.039512  | 78 | 1 | 0 | 1.595213   | 6.459721  | 1.717935  |
| 79 | 1 | 0 | 11.993662  | -1.623986 | 0.118331  | 79 | 1 | 0 | -0.823473  | 7.181571  | 1.920005  |
| 80 | 1 | 0 | 9.879696   | -0.361451 | 0.137279  | 80 | 1 | 0 | -2.053490  | 5.903826  | 1.916258  |
| 81 | 1 | 0 | -1.989641  | 6.969756  | 1.246172  | 81 | 1 | 0 | -0.381919  | 5.515144  | 2.340002  |
| 82 | 1 | 0 | -4.249647  | 7.939830  | 1.112256  | 82 | 1 | 0 | -2.706696  | 6.535770  | -0.353603 |
| 83 | 1 | 0 | -6.013210  | 6.831416  | -0.238055 | 83 | 1 | 0 | -1.433296  | 7.758570  | -0.519481 |
| 84 | 1 | 0 | -5.490347  | 4.721550  | -1.442387 | 84 | 1 | 0 | -1.595215  | 6.459724  | -1.717943 |
| 85 | 1 | 0 | -3.221120  | 3.735994  | -1.285379 |    |   |   |            |           |           |
| 86 | 1 | 0 | 1.989697   | 6.969725  | 1.246173  |    |   |   |            |           |           |
| 87 | 1 | 0 | 4.249707   | 7.939786  | 1.112229  |    |   |   |            |           |           |
| 88 | 1 | 0 | 6.013238   | 6.831380  | -0.238129 |    |   |   |            |           |           |
| 89 | 1 | 0 | 5.490340   | 4.721535  | -1.442482 |    |   |   |            |           |           |
| 90 | 1 | 0 | 3.221110   | 3.735991  | -1.285447 |    |   |   |            |           |           |

R=NN

| Center Number | Atomic Number | Atomic Type | Coordinates (Angstroms) |           |           |
|---------------|---------------|-------------|-------------------------|-----------|-----------|
|               |               |             | X                       | Y         | Z         |
| 1             | 6             | 0           | -11.041805              | -1.188309 | -0.014500 |
| 2             | 6             | 0           | -11.034710              | -2.612554 | -0.015033 |
| 3             | 6             | 0           | -9.852864               | -3.300225 | -0.013152 |
| 4             | 6             | 0           | -8.601591               | -2.612022 | -0.010633 |
| 5             | 6             | 0           | -8.608905               | -1.166726 | -0.010073 |
| 6             | 6             | 0           | -9.866309               | -0.489926 | -0.012087 |
| 7             | 6             | 0           | -7.377876               | -3.287115 | -0.008799 |
| 8             | 6             | 0           | -6.154126               | -2.603490 | -0.006501 |
| 9             | 6             | 0           | -6.162057               | -1.152884 | -0.005878 |
| 10            | 6             | 0           | -7.391606               | -0.480347 | -0.007669 |
| 11            | 6             | 0           | -4.910903               | -3.277384 | -0.004959 |
| 12            | 6             | 0           | -3.700710               | -2.592742 | -0.003067 |
| 13            | 6             | 0           | -3.710201               | -1.136100 | -0.002337 |
| 14            | 6             | 0           | -4.926357               | -0.464842 | -0.003667 |
| 15            | 6             | 0           | -2.448221               | -3.255482 | -0.002023 |
| 16            | 6             | 0           | -1.235703               | -2.567987 | -0.000734 |
| 17            | 6             | 0           | -1.250241               | -1.104363 | -0.000093 |
| 18            | 6             | 0           | -2.470920               | -0.442793 | -0.000720 |
| 19            | 6             | 0           | 0.000001                | -3.240789 | -0.000008 |
| 20            | 6             | 0           | 1.235704                | -2.567987 | 0.000723  |
| 21            | 6             | 0           | 1.250242                | -1.104363 | 0.000089  |
| 22            | 6             | 0           | 0.000000                | -0.405811 | 0.000000  |
| 23            | 6             | 0           | 2.448222                | -3.255482 | 0.002009  |
| 24            | 6             | 0           | 3.700712                | -2.592742 | 0.003058  |
| 25            | 6             | 0           | 3.710202                | -1.136099 | 0.002336  |
| 26            | 6             | 0           | 2.470921                | -0.442793 | 0.000720  |
| 27            | 6             | 0           | 4.910904                | -3.277383 | 0.004948  |
| 28            | 6             | 0           | 6.154127                | -2.603489 | 0.006496  |
| 29            | 6             | 0           | 6.162058                | -1.152883 | 0.005882  |
| 30            | 6             | 0           | 4.926357                | -0.464842 | 0.003671  |
| 31            | 6             | 0           | 7.377877                | -3.287113 | 0.008793  |
| 32            | 6             | 0           | 8.601592                | -2.612021 | 0.010636  |
| 33            | 6             | 0           | 8.608906                | -1.166725 | 0.010085  |
| 34            | 6             | 0           | 7.391607                | -0.480346 | 0.007681  |
| 35            | 6             | 0           | 9.852865                | -3.300223 | 0.013154  |
| 36            | 6             | 0           | 11.034711               | -2.612552 | 0.015044  |
| 37            | 6             | 0           | 11.041806               | -1.188307 | 0.014520  |
| 38            | 6             | 0           | 9.866309                | -0.489925 | 0.012107  |
| 39            | 6             | 0           | 0.000001                | 1.001398  | 0.000001  |













|    |   |   |            |           |           |
|----|---|---|------------|-----------|-----------|
| 24 | 6 | 0 | 3.663406   | -2.545635 | -0.034629 |
| 25 | 6 | 0 | 3.683947   | -1.095944 | -0.167667 |
| 26 | 6 | 0 | 2.459515   | -0.398414 | -0.280888 |
| 27 | 6 | 0 | 4.873438   | -3.236725 | 0.067609  |
| 28 | 6 | 0 | 6.117416   | -2.573234 | 0.050592  |
| 29 | 6 | 0 | 6.137809   | -1.125866 | -0.074985 |
| 30 | 6 | 0 | 4.913405   | -0.433626 | -0.179988 |
| 31 | 6 | 0 | 7.337518   | -3.261355 | 0.153366  |
| 32 | 6 | 0 | 8.565589   | -2.596129 | 0.138823  |
| 33 | 6 | 0 | 8.585627   | -1.155221 | 0.014733  |
| 34 | 6 | 0 | 7.376178   | -0.463983 | -0.088160 |
| 35 | 6 | 0 | 9.810433   | -3.288862 | 0.242920  |
| 36 | 6 | 0 | 10.997888  | -2.611035 | 0.226373  |
| 37 | 6 | 0 | 11.017566  | -1.191811 | 0.104325  |
| 38 | 6 | 0 | 9.849006   | -0.489069 | 0.002022  |
| 39 | 6 | 0 | -0.012110  | 1.148745  | -0.620186 |
| 40 | 6 | 0 | -0.001876  | 1.972913  | 0.697515  |
| 41 | 6 | 0 | 0.034098   | 3.426962  | 0.425365  |
| 42 | 7 | 0 | -1.052266  | 4.209040  | 0.287095  |
| 43 | 6 | 0 | -0.669767  | 5.667331  | 0.168960  |
| 44 | 6 | 0 | 0.849582   | 5.549388  | -0.222490 |
| 45 | 7 | 0 | 1.157621   | 4.137569  | 0.222452  |
| 46 | 8 | 0 | 2.346215   | 3.679421  | 0.231113  |
| 47 | 8 | 0 | -2.264091  | 3.834471  | 0.394718  |
| 48 | 6 | 0 | 1.118201   | 5.581321  | -1.735875 |
| 49 | 6 | 0 | 1.794367   | 6.515637  | 0.490025  |
| 50 | 6 | 0 | -0.922813  | 6.282564  | 1.555085  |
| 51 | 6 | 0 | -1.569817  | 6.339367  | -0.866195 |
| 52 | 1 | 0 | -12.012001 | -0.587594 | 0.061686  |
| 53 | 1 | 0 | -11.995427 | -3.067397 | 0.274419  |
| 54 | 1 | 0 | -9.864765  | -4.300699 | 0.309550  |
| 55 | 1 | 0 | -9.897286  | 0.661480  | -0.116358 |
| 56 | 1 | 0 | -7.393056  | -4.290915 | 0.227402  |
| 57 | 1 | 0 | -7.425354  | 0.670140  | -0.199727 |
| 58 | 1 | 0 | -4.926367  | -4.282727 | 0.152214  |
| 59 | 1 | 0 | -4.961392  | 0.683231  | -0.284320 |
| 60 | 1 | 0 | -2.452935  | -4.255023 | 0.098156  |
| 61 | 1 | 0 | -2.547973  | 0.698186  | -0.367665 |
| 62 | 1 | 0 | -0.034568  | -4.246034 | 0.071183  |
| 63 | 1 | 0 | 2.384054   | -4.272780 | 0.104852  |
| 64 | 1 | 0 | 2.516394   | 0.680026  | -0.363052 |
| 65 | 1 | 0 | 4.857537   | -4.317823 | 0.165624  |
| 66 | 1 | 0 | 4.927498   | 0.647857  | -0.272076 |
| 67 | 1 | 0 | 7.323885   | -4.342985 | 0.247219  |
| 68 | 1 | 0 | 7.391528   | 0.617628  | -0.180920 |
| 69 | 1 | 0 | 9.795224   | -4.369826 | 0.335993  |
| 70 | 1 | 0 | 11.934442  | -3.151303 | 0.306387  |
| 71 | 1 | 0 | 11.968754  | -0.671710 | 0.093221  |
| 72 | 1 | 0 | 9.863195   | 0.591912  | -0.090799 |
| 73 | 1 | 0 | 0.859931   | 1.429679  | -1.212068 |
| 74 | 1 | 0 | -0.883737  | 1.441228  | -1.207065 |
| 75 | 1 | 0 | -0.897988  | 1.755278  | 1.280988  |
| 76 | 1 | 0 | 0.880530   | 1.715223  | 1.286134  |
| 77 | 1 | 0 | 0.957030   | 6.582417  | -2.140035 |
| 78 | 1 | 0 | 2.157558   | 5.297877  | -1.906982 |
| 79 | 1 | 0 | 0.481001   | 4.879481  | -2.277062 |
| 80 | 1 | 0 | 2.821299   | 6.255784  | 0.232721  |
| 81 | 1 | 0 | 1.601309   | 7.540974  | 0.165844  |
| 82 | 1 | 0 | 1.698797   | 6.466144  | 1.573939  |
| 83 | 1 | 0 | -0.711143  | 7.353475  | 1.551780  |
| 84 | 1 | 0 | -1.973129  | 6.134578  | 1.810424  |
| 85 | 1 | 0 | -0.315284  | 5.808194  | 2.327826  |
| 86 | 1 | 0 | -2.605907  | 6.255988  | -0.538059 |
| 87 | 1 | 0 | -1.315641  | 7.398096  | -0.956602 |
| 88 | 1 | 0 | -1.492324  | 5.874631  | -1.848258 |







|    |   |   |           |           |           |    |    |   |           |           |           |
|----|---|---|-----------|-----------|-----------|----|----|---|-----------|-----------|-----------|
| 16 | 6 | 0 | -4.161474 | -1.242382 | 0.000004  | 5  | 6  | 0 | -0.051032 | 1.333171  | -0.000003 |
| 17 | 6 | 0 | -3.439959 | 0.000000  | 0.000002  | 6  | 6  | 0 | -0.661888 | 2.596842  | -0.000004 |
| 18 | 6 | 0 | -4.161472 | 1.242381  | 0.000003  | 7  | 6  | 0 | 2.042146  | -0.002756 | -0.000001 |
| 19 | 6 | 0 | -3.446146 | 2.440034  | -0.000001 | 8  | 6  | 0 | 1.277882  | -1.209390 | -0.000002 |
| 20 | 6 | 0 | -5.587277 | -1.208442 | 0.000006  | 9  | 6  | 0 | -0.151196 | -1.166955 | -0.000003 |
| 21 | 6 | 0 | -6.271824 | 0.000002  | 0.000008  | 10 | 6  | 0 | -0.821510 | 0.111971  | -0.000004 |
| 22 | 6 | 0 | -5.587278 | 1.208444  | 0.000007  | 11 | 6  | 0 | 1.950842  | -2.468401 | -0.000001 |
| 23 | 6 | 0 | 2.241218  | 0.000000  | -0.000002 | 12 | 6  | 0 | 1.183421  | -3.661059 | -0.000002 |
| 24 | 6 | 0 | 3.458698  | 0.000000  | 0.000000  | 13 | 6  | 0 | -0.196013 | -3.606241 | -0.000003 |
| 25 | 6 | 0 | 4.876128  | 0.000000  | 0.000002  | 14 | 6  | 0 | -0.861102 | -2.377803 | -0.000004 |
| 26 | 6 | 0 | 5.596196  | -1.211842 | -0.000090 | 15 | 6  | 0 | 3.558445  | 2.378671  | 0.000001  |
| 27 | 6 | 0 | 6.984546  | -1.206290 | -0.000087 | 16 | 6  | 0 | 4.224934  | 1.153225  | 0.000002  |
| 28 | 6 | 0 | 7.685211  | 0.000001  | 0.000007  | 17 | 6  | 0 | 3.453934  | -0.059332 | 0.000001  |
| 29 | 6 | 0 | 6.984546  | 1.206290  | 0.000098  | 18 | 6  | 0 | 4.125409  | -1.329664 | 0.000002  |
| 30 | 6 | 0 | 5.596195  | 1.211843  | 0.000096  | 19 | 6  | 0 | 3.362948  | -2.497822 | 0.000001  |
| 31 | 1 | 0 | 0.606966  | -4.628981 | 0.000033  | 20 | 6  | 0 | 5.648076  | 1.062068  | 0.000004  |
| 32 | 1 | 0 | -1.866208 | -4.622770 | 0.000023  | 21 | 6  | 0 | 6.283724  | -0.172820 | 0.000005  |
| 33 | 1 | 0 | 1.861929  | -2.503999 | 0.000019  | 22 | 6  | 0 | 5.551298  | -1.352842 | 0.000004  |
| 34 | 1 | 0 | -1.866208 | 4.622771  | -0.000031 | 23 | 6  | 0 | -2.217654 | 0.167524  | -0.000006 |
| 35 | 1 | 0 | 0.606965  | 4.628981  | -0.000053 | 24 | 6  | 0 | -3.436403 | 0.220198  | -0.000005 |
| 36 | 1 | 0 | 1.861928  | 2.504000  | -0.000039 | 25 | 6  | 0 | -4.831684 | 0.267550  | -0.000001 |
| 37 | 1 | 0 | -3.986926 | -3.380931 | 0.000004  | 26 | 6  | 0 | -5.662460 | 1.374375  | 0.000003  |
| 38 | 1 | 0 | -3.986923 | 3.380929  | -0.000004 | 27 | 6  | 0 | -7.039160 | 1.043933  | 0.000007  |
| 39 | 1 | 0 | -6.131146 | -2.146388 | 0.000016  | 28 | 6  | 0 | -7.265881 | -0.305788 | 0.000007  |
| 40 | 1 | 0 | -7.356276 | 0.000002  | 0.000010  | 29 | 16 | 0 | -5.791199 | -1.209902 | 0.000002  |
| 41 | 1 | 0 | -6.131145 | 2.146391  | -0.000001 | 30 | 1  | 0 | -0.403142 | 4.728878  | -0.000004 |
| 42 | 1 | 0 | 5.052619  | -2.148794 | -0.000166 | 31 | 1  | 0 | 2.067721  | 4.623102  | -0.000001 |
| 43 | 1 | 0 | 7.523819  | -2.146832 | -0.000159 | 32 | 1  | 0 | -1.742650 | 2.657072  | -0.000006 |
| 44 | 1 | 0 | 8.769086  | 0.000001  | 0.000009  | 33 | 1  | 0 | 1.697655  | -4.615797 | -0.000001 |
| 45 | 1 | 0 | 7.523818  | 2.146833  | 0.000172  | 34 | 1  | 0 | -0.774141 | -4.523458 | -0.000004 |
| 46 | 1 | 0 | 5.052618  | 2.148793  | 0.000171  | 35 | 1  | 0 | -1.943249 | -2.352687 | -0.000005 |
|    |   |   |           |           |           | 36 | 1  | 0 | 4.136615  | 3.297052  | 0.000003  |
|    |   |   |           |           |           | 37 | 1  | 0 | 3.865744  | -3.459539 | 0.000001  |
|    |   |   |           |           |           | 38 | 1  | 0 | 6.229113  | 1.977459  | -0.000005 |
|    |   |   |           |           |           | 39 | 1  | 0 | 7.367301  | -0.216236 | 0.000007  |
|    |   |   |           |           |           | 40 | 1  | 0 | 6.057147  | -2.311825 | 0.000005  |
|    |   |   |           |           |           | 41 | 1  | 0 | -5.276919 | 2.384500  | 0.000002  |
|    |   |   |           |           |           | 42 | 1  | 0 | -7.834002 | 1.777825  | 0.000010  |
|    |   |   |           |           |           | 43 | 1  | 0 | -8.211988 | -0.824864 | 0.000010  |

R=BzTh

| Center Number | Atomic Number | Atomic Type | Coordinates (Angstroms) |           |           |
|---------------|---------------|-------------|-------------------------|-----------|-----------|
|               |               |             | X                       | Y         | Z         |
| 1             | 6             | 0           | -0.958929               | -3.644824 | 0.000002  |
| 2             | 6             | 0           | -2.339369               | -3.660987 | 0.000001  |
| 3             | 6             | 0           | -3.073362               | -2.447563 | 0.000001  |
| 4             | 6             | 0           | -2.365632               | -1.207838 | 0.000001  |
| 5             | 6             | 0           | -0.936117               | -1.205441 | 0.000002  |
| 6             | 6             | 0           | -0.259986               | -2.435345 | 0.000002  |
| 7             | 6             | 0           | -3.095939               | 0.019603  | 0.000000  |
| 8             | 6             | 0           | -2.395868               | 1.264587  | 0.000001  |
| 9             | 6             | 0           | -0.966648               | 1.297071  | 0.000003  |
| 10            | 6             | 0           | -0.230371               | 0.054639  | 0.000003  |
| 11            | 6             | 0           | -3.133793               | 2.486664  | 0.000001  |
| 12            | 6             | 0           | -2.429641               | 3.717627  | 0.000001  |
| 13            | 6             | 0           | -1.049195               | 3.735102  | 0.000003  |
| 14            | 6             | 0           | -0.320829               | 2.543113  | 0.000004  |
| 15            | 6             | 0           | -4.485712               | -2.437795 | -0.000001 |
| 16            | 6             | 0           | -5.215364               | -1.248860 | -0.000002 |
| 17            | 6             | 0           | -4.508718               | 0.002319  | -0.000001 |
| 18            | 6             | 0           | -5.245799               | 1.235844  | -0.000002 |
| 19            | 6             | 0           | -4.545526               | 2.442315  | -0.000001 |
| 20            | 6             | 0           | -6.641305               | -1.232379 | -0.000003 |
| 21            | 6             | 0           | -7.340620               | -0.032459 | -0.000004 |
| 22            | 6             | 0           | -6.670886               | 1.184263  | -0.000004 |
| 23            | 6             | 0           | 1.165993                | 0.070755  | 0.000003  |
| 24            | 6             | 0           | 2.385957                | 0.089770  | 0.000003  |
| 25            | 6             | 0           | 3.781319                | 0.088093  | 0.000001  |
| 26            | 6             | 0           | 4.636470                | 1.163723  | 0.000000  |
| 27            | 6             | 0           | 6.017384                | 0.801146  | -0.000001 |
| 28            | 6             | 0           | 6.204182                | -0.604345 | -0.000001 |
| 29            | 16            | 0           | 4.669731                | -1.452342 | 0.000001  |
| 30            | 6             | 0           | 7.152675                | 1.634175  | -0.000002 |
| 31            | 6             | 0           | 8.415997                | 1.069742  | -0.000003 |
| 32            | 6             | 0           | 8.579401                | -0.326171 | -0.000004 |
| 33            | 6             | 0           | 7.478736                | -1.172269 | -0.000003 |
| 34            | 1             | 0           | -0.406530               | -4.577695 | 0.000003  |
| 35            | 1             | 0           | -2.879950               | -4.601052 | 0.000001  |
| 36            | 1             | 0           | 0.822441                | -2.440533 | 0.000003  |
| 37            | 1             | 0           | -2.992986               | 4.644226  | 0.000001  |
| 38            | 1             | 0           | -0.520222               | 4.681536  | 0.000003  |
| 39            | 1             | 0           | 0.761180                | 2.573354  | 0.000005  |
| 40            | 1             | 0           | -5.015028               | -3.385150 | -0.000001 |
| 41            | 1             | 0           | -5.097904               | 3.376409  | -0.000003 |
| 42            | 1             | 0           | -7.173609               | -2.176913 | -0.000004 |
| 43            | 1             | 0           | -8.424962               | -0.045726 | -0.000006 |
| 44            | 1             | 0           | -7.226245               | 2.115436  | -0.000005 |
| 45            | 1             | 0           | 4.280526                | 2.185144  | 0.000000  |
| 46            | 1             | 0           | 7.029233                | 2.711485  | -0.000002 |
| 47            | 1             | 0           | 9.291420                | 1.708765  | -0.000004 |
| 48            | 1             | 0           | 9.577164                | -0.749438 | -0.000005 |
| 49            | 1             | 0           | 7.608738                | -2.248033 | -0.000003 |

R=Th

| Center Number | Atomic Number | Atomic Type | Coordinates (Angstroms) |          |           |
|---------------|---------------|-------------|-------------------------|----------|-----------|
|               |               |             | X                       | Y        | Z         |
| 1             | 6             | 0           | 0.099405                | 3.768103 | -0.000003 |
| 2             | 6             | 0           | 1.478838                | 3.712512 | -0.000001 |
| 3             | 6             | 0           | 2.148465                | 2.462361 | -0.000001 |
| 4             | 6             | 0           | 1.376880                | 1.261191 | -0.000002 |





|                           |               |             |                         |           |           |                          |   |   |           |           |           |
|---------------------------|---------------|-------------|-------------------------|-----------|-----------|--------------------------|---|---|-----------|-----------|-----------|
| 15                        | 6             | 0           | -4.690262               | 2.338977  | 0.039010  | 48                       | 1 | 0 | -7.817657 | 2.139124  | -0.175694 |
| 16                        | 6             | 0           | -5.317106               | 1.081513  | 0.026336  | 49                       | 1 | 0 | 3.351621  | 2.076291  | 0.544915  |
| 17                        | 6             | 0           | -4.505218               | -0.098718 | 0.005327  | 50                       | 1 | 0 | 3.351623  | -2.076292 | -0.544909 |
| 18                        | 6             | 0           | -5.125607               | -1.389956 | -0.008207 | 51                       | 1 | 0 | 9.220809  | -1.205716 | -0.313407 |
| 19                        | 6             | 0           | -4.312521               | -2.535688 | -0.029259 | 52                       | 1 | 0 | 7.973597  | -3.271302 | -0.850532 |
| 20                        | 6             | 0           | -6.729657               | 0.940879  | 0.033560  | 53                       | 1 | 0 | 5.502492  | -3.281392 | -0.852984 |
| 21                        | 6             | 0           | -7.320197               | -0.316849 | 0.020524  | 54                       | 1 | 0 | 5.502489  | 3.281392  | 0.852988  |
| 22                        | 6             | 0           | -6.543014               | -1.468473 | -0.000048 | 55                       | 1 | 0 | 7.973594  | 3.271304  | 0.850535  |
| 23                        | 6             | 0           | 1.156079                | 0.329586  | -0.019538 | 56                       | 1 | 0 | 9.220808  | 1.205720  | 0.313411  |
| 24                        | 6             | 0           | 2.366199                | 0.383624  | -0.022183 | <hr/> <b>R=Ver</b> <hr/> |   |   |           |           |           |
| 25                        | 6             | 0           | 3.779331                | 0.370766  | -0.028229 |                          |   |   |           |           |           |
| 26                        | 7             | 0           | 4.446183                | -0.875796 | -0.063109 |                          |   |   |           |           |           |
| 27                        | 6             | 0           | 5.905575                | -0.637841 | 0.187474  |                          |   |   |           |           |           |
| 28                        | 6             | 0           | 5.966628                | 0.905175  | -0.141965 |                          |   |   |           |           |           |
| 29                        | 7             | 0           | 4.566364                | 1.389217  | -0.001685 |                          |   |   |           |           |           |
| 30                        | 6             | 0           | 6.870218                | 1.717701  | 0.790778  |                          |   |   |           |           |           |
| 31                        | 6             | 0           | 6.365829                | 1.192091  | -1.603301 |                          |   |   |           |           |           |
| 32                        | 6             | 0           | 6.735730                | -1.567496 | -0.696097 |                          |   |   |           |           |           |
| 33                        | 6             | 0           | 6.149259                | -0.973973 | 1.669887  |                          |   |   |           |           |           |
| 34                        | 8             | 0           | 3.908282                | -2.017272 | -0.071046 |                          |   |   |           |           |           |
| 35                        | 1             | 0           | -0.810636               | 4.825749  | 0.047495  |                          |   |   |           |           |           |
| 36                        | 1             | 0           | -3.277458               | 4.633924  | 0.060181  |                          |   |   |           |           |           |
| 37                        | 1             | 0           | 0.602334                | 2.804159  | 0.012757  |                          |   |   |           |           |           |
| 38                        | 1             | 0           | -2.562968               | -4.585331 | -0.069757 |                          |   |   |           |           |           |
| 39                        | 1             | 0           | -0.095420               | -4.393925 | -0.084474 |                          |   |   |           |           |           |
| 40                        | 1             | 0           | 0.991950                | -2.184192 | -0.060703 |                          |   |   |           |           |           |
| 41                        | 1             | 0           | -5.303281               | 3.234253  | 0.054743  |                          |   |   |           |           |           |
| 42                        | 1             | 0           | -4.780377               | -3.514759 | -0.039704 |                          |   |   |           |           |           |
| 43                        | 1             | 0           | -7.344569               | 1.833836  | 0.049482  |                          |   |   |           |           |           |
| 44                        | 1             | 0           | -8.401287               | -0.400691 | 0.026413  |                          |   |   |           |           |           |
| 45                        | 1             | 0           | -7.013151               | -2.445520 | -0.010200 |                          |   |   |           |           |           |
| 46                        | 1             | 0           | 6.824030                | 2.769296  | 0.501429  |                          |   |   |           |           |           |
| 47                        | 1             | 0           | 6.552928                | 1.646492  | 1.830953  |                          |   |   |           |           |           |
| 48                        | 1             | 0           | 7.910420                | 1.386867  | 0.718059  |                          |   |   |           |           |           |
| 49                        | 1             | 0           | 7.410456                | 0.930256  | -1.789877 |                          |   |   |           |           |           |
| 50                        | 1             | 0           | 5.736060                | 0.644001  | -2.307037 |                          |   |   |           |           |           |
| 51                        | 1             | 0           | 6.234689                | 2.257583  | -1.799462 |                          |   |   |           |           |           |
| 52                        | 1             | 0           | 6.504281                | -2.604019 | -0.444453 |                          |   |   |           |           |           |
| 53                        | 1             | 0           | 6.527264                | -1.425427 | -1.755959 |                          |   |   |           |           |           |
| 54                        | 1             | 0           | 7.801609                | -1.400211 | -0.523326 |                          |   |   |           |           |           |
| 55                        | 1             | 0           | 7.202094                | -0.848786 | 1.930033  |                          |   |   |           |           |           |
| 56                        | 1             | 0           | 5.550081                | -0.344840 | 2.330609  |                          |   |   |           |           |           |
| 57                        | 1             | 0           | 5.869253                | -2.014913 | 1.844026  |                          |   |   |           |           |           |
| <hr/> <b>R=Phen</b> <hr/> |               |             |                         |           |           |                          |   |   |           |           |           |
| Center Number             | Atomic Number | Atomic Type | Coordinates (Angstroms) |           |           |                          |   |   |           |           |           |
|                           |               |             | X                       | Y         | Z         |                          |   |   |           |           |           |
| 1                         | 6             | 0           | -1.614785               | -3.672174 | 0.311575  |                          |   |   |           |           |           |
| 2                         | 6             | 0           | -3.000814               | -3.675404 | 0.306942  |                          |   |   |           |           |           |
| 3                         | 6             | 0           | -3.724744               | -2.460694 | 0.203597  |                          |   |   |           |           |           |
| 4                         | 6             | 0           | -3.001211               | -1.227906 | 0.101212  |                          |   |   |           |           |           |
| 5                         | 6             | 0           | -1.572798               | -1.238079 | 0.103600  |                          |   |   |           |           |           |
| 6                         | 6             | 0           | -0.904325               | -2.479925 | 0.212959  |                          |   |   |           |           |           |
| 7                         | 6             | 0           | -3.715281               | 0.000000  | -0.000001 |                          |   |   |           |           |           |
| 8                         | 6             | 0           | -3.001209               | 1.227905  | -0.101218 |                          |   |   |           |           |           |
| 9                         | 6             | 0           | -1.572797               | 1.238075  | -0.103611 |                          |   |   |           |           |           |
| 10                        | 6             | 0           | -0.858926               | -0.000003 | -0.000004 |                          |   |   |           |           |           |
| 11                        | 6             | 0           | -3.724740               | 2.460694  | -0.203601 |                          |   |   |           |           |           |
| 12                        | 6             | 0           | -3.000808               | 3.675402  | -0.306951 |                          |   |   |           |           |           |
| 13                        | 6             | 0           | -1.614779               | 3.672170  | -0.311590 |                          |   |   |           |           |           |
| 14                        | 6             | 0           | -0.904321               | 2.479919  | -0.212975 |                          |   |   |           |           |           |
| 15                        | 6             | 0           | -5.131954               | -2.435837 | 0.200728  |                          |   |   |           |           |           |
| 16                        | 6             | 0           | -5.854395               | -1.235060 | 0.101460  |                          |   |   |           |           |           |
| 17                        | 6             | 0           | -5.136016               | 0.000001  | 0.000002  |                          |   |   |           |           |           |
| 18                        | 6             | 0           | -5.854393               | 1.235064  | -0.101453 |                          |   |   |           |           |           |
| 19                        | 6             | 0           | -5.131950               | 2.435839  | -0.200726 |                          |   |   |           |           |           |
| 20                        | 6             | 0           | -7.273684               | -1.204220 | 0.098883  |                          |   |   |           |           |           |
| 21                        | 6             | 0           | -7.959863               | 0.000004  | 0.000010  |                          |   |   |           |           |           |
| 22                        | 6             | 0           | -7.273682               | 1.204227  | -0.098867 |                          |   |   |           |           |           |
| 23                        | 6             | 0           | 0.553134                | -0.000003 | -0.000001 |                          |   |   |           |           |           |
| 24                        | 6             | 0           | 1.766889                | -0.000002 | 0.000001  |                          |   |   |           |           |           |
| 25                        | 6             | 0           | 3.191152                | -0.000001 | 0.000003  |                          |   |   |           |           |           |
| 26                        | 6             | 0           | 3.898709                | 1.172575  | 0.304344  |                          |   |   |           |           |           |
| 27                        | 6             | 0           | 5.309622                | 1.196304  | 0.310230  |                          |   |   |           |           |           |
| 28                        | 6             | 0           | 6.026352                | 0.000000  | 0.000002  |                          |   |   |           |           |           |
| 29                        | 6             | 0           | 5.309624                | -1.196304 | -0.310226 |                          |   |   |           |           |           |
| 30                        | 6             | 0           | 3.898710                | -1.172576 | -0.304340 |                          |   |   |           |           |           |
| 31                        | 6             | 0           | 7.454604                | 0.000001  | 0.000002  |                          |   |   |           |           |           |
| 32                        | 6             | 0           | 8.136371                | -1.201800 | -0.312286 |                          |   |   |           |           |           |
| 33                        | 6             | 0           | 7.431777                | -2.362315 | -0.613977 |                          |   |   |           |           |           |
| 34                        | 6             | 0           | 6.043014                | -2.371700 | -0.616140 |                          |   |   |           |           |           |
| 35                        | 6             | 0           | 6.043012                | 2.371701  | 0.616144  |                          |   |   |           |           |           |
| 36                        | 6             | 0           | 7.431775                | 2.362317  | 0.613981  |                          |   |   |           |           |           |
| 37                        | 6             | 0           | 8.136371                | 1.201802  | 0.312290  |                          |   |   |           |           |           |
| 38                        | 1             | 0           | -1.074646               | -4.608758 | 0.394208  |                          |   |   |           |           |           |
| 39                        | 1             | 0           | -3.549112               | -4.607780 | 0.384265  |                          |   |   |           |           |           |
| 40                        | 1             | 0           | 0.177747                | -2.490390 | 0.222634  |                          |   |   |           |           |           |
| 41                        | 1             | 0           | -3.549104               | 4.607780  | -0.384273 |                          |   |   |           |           |           |
| 42                        | 1             | 0           | -1.074639               | 4.608752  | -0.394229 |                          |   |   |           |           |           |
| 43                        | 1             | 0           | 0.177751                | 2.490382  | -0.222656 |                          |   |   |           |           |           |
| 44                        | 1             | 0           | -5.673669               | -3.372950 | 0.278360  |                          |   |   |           |           |           |
| 45                        | 1             | 0           | -5.673665               | 3.372954  | -0.278355 |                          |   |   |           |           |           |
| 46                        | 1             | 0           | -7.817661               | -2.139116 | 0.175712  |                          |   |   |           |           |           |
| 47                        | 1             | 0           | -9.044242               | 0.000005  | 0.000013  |                          |   |   |           |           |           |
| <hr/> <b>R=NN</b> <hr/>   |               |             |                         |           |           |                          |   |   |           |           |           |
| Center Number             | Atomic Number | Atomic Type | Coordinates (Angstroms) |           |           |                          |   |   |           |           |           |
|                           |               |             | X                       | Y         | Z         |                          |   |   |           |           |           |
| 1                         | 6             | 0           | 1.143463                | -3.683283 | -0.051280 |                          |   |   |           |           |           |
| 2                         | 6             | 0           | 2.530542                | -3.686965 | -0.050921 |                          |   |   |           |           |           |
| 3                         | 6             | 0           | 3.257872                | -2.469884 | -0.033975 |                          |   |   |           |           |           |
| 4                         | 6             | 0           | 2.535848                | -1.232801 | -0.016911 |                          |   |   |           |           |           |
| 5                         | 6             | 0           | 1.108184                | -1.244223 | -0.017039 |                          |   |   |           |           |           |
| 6                         | 6             | 0           | 0.431680                | -2.488270 | -0.034857 |                          |   |   |           |           |           |
| 7                         | 6             | 0           | 3.248403                | 0.000000  | -0.000002 |                          |   |   |           |           |           |
| 8                         | 6             | 0           | 2.535845                | 1.232799  | 0.016903  |                          |   |   |           |           |           |
| 9                         | 6             | 0           | 1.108180                | 1.244217  | 0.017022  |                          |   |   |           |           |           |
| 10                        | 6             | 0           | 0.403294                | -0.000004 | -0.000010 |                          |   |   |           |           |           |
| 11                        | 6             | 0           | 3.257865                | 2.469884  | 0.033971  |                          |   |   |           |           |           |

|    |   |   |           |           |           |
|----|---|---|-----------|-----------|-----------|
| 12 | 6 | 0 | 2.530532  | 3.686964  | 0.050912  |
| 13 | 6 | 0 | 1.143454  | 3.683278  | 0.051262  |
| 14 | 6 | 0 | 0.431673  | 2.488263  | 0.034836  |
| 15 | 6 | 0 | 4.669908  | 0.000002  | 0.000003  |
| 16 | 6 | 0 | 5.387557  | 1.239317  | 0.016985  |
| 17 | 6 | 0 | 4.664933  | 2.444883  | 0.033559  |
| 18 | 6 | 0 | 4.664939  | -2.444879 | -0.033554 |
| 19 | 6 | 0 | 5.387560  | -1.239311 | -0.016973 |
| 20 | 6 | 0 | 6.806738  | -1.208310 | -0.016537 |
| 21 | 6 | 0 | 7.492683  | 0.000006  | 0.000014  |
| 22 | 6 | 0 | 6.806735  | 1.208320  | 0.016559  |
| 23 | 6 | 0 | -1.005269 | -0.000005 | -0.000012 |
| 24 | 6 | 0 | -2.216615 | -0.000005 | -0.000011 |
| 25 | 6 | 0 | -3.611633 | -0.000003 | -0.000004 |
| 26 | 7 | 0 | -4.386180 | 1.114816  | 0.028979  |
| 27 | 6 | 0 | -5.840964 | 0.763824  | -0.180282 |
| 28 | 6 | 0 | -5.840966 | -0.763822 | 0.180294  |
| 29 | 7 | 0 | -4.386184 | -1.114818 | -0.028982 |
| 30 | 6 | 0 | -6.136135 | 1.063108  | -1.659888 |
| 31 | 6 | 0 | -6.704457 | 1.652809  | 0.712165  |
| 32 | 6 | 0 | -6.136122 | -1.063104 | 1.659904  |
| 33 | 6 | 0 | -6.704470 | -1.652804 | -0.712143 |
| 34 | 8 | 0 | -3.980631 | -2.314337 | -0.047509 |
| 35 | 8 | 0 | -3.980622 | 2.314333  | 0.047504  |
| 36 | 1 | 0 | 0.602219  | -4.622494 | -0.064669 |
| 37 | 1 | 0 | 3.077009  | -4.623577 | -0.063840 |
| 38 | 1 | 0 | -0.651551 | -2.501372 | -0.036000 |
| 39 | 1 | 0 | 3.076996  | 4.623577  | 0.063834  |
| 40 | 1 | 0 | 0.602206  | 4.622487  | 0.064647  |
| 41 | 1 | 0 | -0.651557 | 2.501362  | 0.035973  |
| 42 | 1 | 0 | 5.207071  | 3.384843  | 0.046482  |
| 43 | 1 | 0 | 5.207081  | -3.384838 | -0.046472 |
| 44 | 1 | 0 | 7.350906  | -2.146126 | -0.029380 |
| 45 | 1 | 0 | 8.577051  | 0.000007  | 0.000018  |
| 46 | 1 | 0 | 7.350900  | 2.146137  | 0.029406  |
| 47 | 1 | 0 | -7.187714 | 0.883954  | -1.891712 |
| 48 | 1 | 0 | -5.909915 | 2.113285  | -1.850016 |
| 49 | 1 | 0 | -5.521739 | 0.456083  | -2.327375 |
| 50 | 1 | 0 | -6.536432 | 2.694835  | 0.440240  |
| 51 | 1 | 0 | -7.761609 | 1.418955  | 0.565381  |
| 52 | 1 | 0 | -6.462241 | 1.539838  | 1.768079  |
| 53 | 1 | 0 | -7.187698 | -0.883946 | 1.891739  |
| 54 | 1 | 0 | -5.909905 | -2.113282 | 1.850029  |
| 55 | 1 | 0 | -5.521717 | -0.456083 | 2.327384  |
| 56 | 1 | 0 | -6.536445 | -2.694830 | -0.440220 |
| 57 | 1 | 0 | -7.761620 | -1.418947 | -0.565347 |
| 58 | 1 | 0 | -6.462266 | -1.539833 | -1.768060 |

---
